# Supplementary material
Source: Research Square preprint supplement (doi:10.21203/rs.3.rs-9320279/v1)
Supplement: Supplementary file 1 [file 08b0336475a8da2d948d601a.xlsx]

## Sheet: Sheet list
Supplementary Table 2 Primers and probes used in this study.
Sheet1. Sheet list
Sheet2. Primers used in this study for gene clone
Sheet3. Primers used in this study for RT-qPCR
Sheet4. Probes used in this study.

## Sheet: Primers for gene clone
Sheet2. Primers used in this study for gene clone.
No	Name	Forward primer sequence (5’-3’)	Reverse primer sequence (5’-3’)	Description
1	MHZ9dCAPs-DdeI	TGCCTATTCATTTTGTAGGCTCTT	AGAACCCTTGTGACGGTAGCTC	for MHZ9 mutation site confirmation
2	MHZ9-GFP	GGATCCCCGGGTGAGCTCATGTCGGAGAGGAAGATGGATCG	GGCCGCACTAGTAAGCTTATCATCAAGGCGATGAATCTCacc	for subcellular localization analysis
3	MHZ9-N-GFP	GGATCCCCGGGTGAGCTCATGTCGGAGAGGAAGATGGATCG	GGCCGCACTAGTAAGCTTAAGGTGTGGCATTACTTCAAA	for subcellular localization analysis
4	OsMAPK3-RFP	ggtgagctcggtaccaagcttATGGACGGGGCGCCGGTG	agcggccgcactagtaagcttgtaccggatgtttgggttcatct	for subcellular localization analysis
5	OsMAPK6-RFP	ggtgagctcggtaccaagcttATGGACGCCGGGGCGCAG	agcggccgcactagtaagcttCTGGTAATCAGGGTTGAACGCA	for subcellular localization analysis
6	MHZ9-nLUC	cgagctcggtacccgggatccATGTCGGAGAGGAAGATGGATCG	cgcgtacgagatctggtcgacATCATCAAGGCGATGAATCTCAC	for split-LUC assay
7	OsMAPK3-cLUC	cggggcggtacccggggatccATGGACGGGGCGCCGGTG	acgaaagctctgcaggtcgacCTAGTACCGGATGTTTGGGTTCA	for split-LUC assay
8	OsMAPK6-cLUC	cggggcggtacccggggatccATGGACGCCGGGGCGCAG	acgaaagctctgcaggtcgacCTACTGGTAATCAGGGTTGAACGC	for split-LUC assay
9	GST-MHZ9	gatctggttccgcgtggatccATGTCGGAGAGGAAGATGGATCG	gtcacgatgcggccgctcgagTTAATCATCAAGGCGATGAATCTC	for pull-down assay
10	GST-MHZ9 (1-233 aa)	gatctggttccgcgtggatccATGTCGGAGAGGAAGATGGATCG	gtcacgatgcggccgctcgagTTACGTTCCTGTTCCAGCTGAGT	for pull-down assay
11	GST-MHZ9 (234-865 aa)	gatctggttccgcgtggatccTACCGCGCTGCTCCGGGA	gtcacgatgcggccgctcgagTTACTGGACTCTCAAAAGATGCTCC	for pull-down assay
12	GST-MHZ9 (866-1530 aa)	gatctggttccgcgtggatccTTTGAGCTTGAGCAACAGCAACG	gtcacgatgcggccgctcgagTTAATCATCAAGGCGATGAATCTC	for pull-down assay
13	MBP-OsMAPK3	aggatttcagaattcggatccATGGACGGGGCGCCGGTG	caagcttgcctgcaggtcgacCTAGTACCGGATGTTTGGGTTCA	for pull-down assay
14	MBP-OsMAPK6	aggatttcagaattcggatccATGGACGCCGGGGCGCAG	caagcttgcctgcaggtcgacCTACTGGTAATCAGGGTTGAACGC	for pull-down assay
15	OsMAPK3-HA	GGGGGACGAGCTCGGTACCatggacggggcgccggtg	CATCGTATGGGTAGTCGACgtaccggatgtttgggttcatct	for Co-IP analysis
16	OsMAPK6-HA	GGGGGACGAGCTCGGTACCATGGACGCCGGGGCGCAG	CATCGTATGGGTAGTCGACCTGGTAATCAGGGTTGAACGCaag	for Co-IP analysis
17	RP1-mRNA-HA	CATCGTATGGGTAGTCGACGCCCCCCCTCTCTCTGTC	GGGGGACGAGCTCGGTACCAGATGCATCGACGTTAAAGG	for RIP-qPCR analysis
18	RP2-mRNA-HA	CATCGTATGGGTAGTCGACGCCGCCAAGGGAATAAGAAC	GGGGGACGAGCTCGGTACCGAAGAAGTTCGACGAGATCAT	for RIP-qPCR analysis
19	RP5-mRNA-HA	CATCGTATGGGTAGTCGACCTATGCTGGCAACGATGCA	GGGGGACGAGCTCGGTACCTTCAGTATAGTCCTGCATGG	for RIP-qPCR analysis
20	RP6-mRNA-HA	CATCGTATGGGTAGTCGACGTTCATAGTTCAGTAATTAATT	GGGGGACGAGCTCGGTACCTGCCAGCCAGCAAAATATCT	for RIP-qPCR analysis
21	BYDV-GFP-RP1	GACgagctgtacaagggtaccATGGAGATGGAGGTCCCGAC	ggtgttgtcttcactggtaccCTATTTGCACCATCCAAAGCAG	for in vitro translation analysis
22	BYDV-GFP-RP1-3'UTR	GACgagctgtacaagggtaccATGGAGATGGAGGTCCCGAC	ggtgttgtcttcactggtaccCGCTGACCACCATAGGGAGG	for in vitro translation analysis
23	BYDV-GFP-RP5	GACgagctgtacaagggtaccATGGCGGAAGCTGCACTACTT	ggtgttgtcttcactggtaccTTAGGACCACTCGTACACACGAA	for in vitro translation analysis
24	BYDV-GFP-RP5-3'UTR	GACgagctgtacaagggtaccATGGCGGAAGCTGCACTACTT	ggtgttgtcttcactggtaccTGGAGAGAATCCTTACACTACTTGCA	for in vitro translation analysis
25	RP1-LUC	TTTGGAGAGGACAGGGTACCATGGAGATGGAGGTCCCG	gtttttggcgtcttccatTTTGCACCATCCAAAGCA	for Dual-luciferase analysis
26	RP2-LUC	TTTGGAGAGGACAGGGTACCATGGATGCTCCGGTGAGT	gtttttggcgtcttccatAAATCGTCCACCTCTCTTG	for Dual-luciferase analysis
27	RP5-LUC	TTTGGAGAGGACAGGGTACCATGGCGGAAGCTGCACTAC	gtttttggcgtcttccatGGACCACTCGTACACACGA	for Dual-luciferase analysis
28	RP6-LUC	TTTGGAGAGGACAGGGTACCATGGCAGAGCTGATGGC	gtttttggcgtcttccatCTCCAAGCACAGCAGCCTA	for Dual-luciferase analysis
29	CRISPR-OsMAPK3	GGCAtcgttgaacgcctgagggat	AAACatccctcaggcgttcaacga	for gene knockout via CRISPR/Cas9
30	CRISPR-RP1	GGCAGGCGAGGCACTGGATGAACG	AAACCGTTCATCCAGTGCCTCGCC	for gene knockout via CRISPR/Cas9
31	CRISPR-RP2	GGCTGGTAGATTCCCCAAGCCAC	AAACGTGGCTTGGGGAATCTACCA	for gene knockout via CRISPR/Cas9
32	CRISPR-RP5	GGCACAGCTACTGTGCAACGGATA	AAACTATCCGTTGCACAGTAGCTG	for gene knockout via CRISPR/Cas9
1776-SAIR2-HA-F	CCAAATCGACTCTAGGGGTACCATGGCGGAGGAGACGATG	pE1776-35S::SAIR2-6×HA
1776-SAIR2-HA-R	GTATGGGTAAGCAGCTCTAGACGAGTTTAATAAACCGTTAAATAAC
1776-GST-HA-F	CAAATCGACTCTAGGGGTACCATGTCCCCTATACTAGGTTATTG	pE1776-35S::GST-6×HA
1776-GST-HA-R	GTATGGGTAAGCAGCTCTAGAGTCACGATGCGGCCGCTC
AD-SAIR1-F	attatgcctctcccgaattcATGGCGGAAGCGAAGGAG	pB42-AD-SAIR1
AD-SAIR1-R	gaagtccaaagcttctcgagTCAGGAGATTAAGGAAGGATTAC
BD-SAIR1-F	acggcgactggctggaattcATGGCGGAAGCGAAGGAG	pLexA-BD-SAIR1
BD-SAIR1-R	tggctgcaggtcgactcgagTCAGGAGATTAAGGAAGGATTAC
BD-SAIR2-F	acggcgactggctggaattcATGGCGGAGGAGACGATG	pLexA-BD-SAIR2
BD-SAIR2-R	tggctgcaggtcgactcgagTTACGAGTTTAATAAACCGTTAAATAAC

## Sheet: Primers for RT-qPCR
Sheet3. Primers used in this study for RT-qPCR.
No	Name	Forward primer sequence (5’-3’)	Reverse primer sequence (5’-3’)
1	MHZ9-qRT	AAGAAGCTGGTAGCAACTGG	CCTGATGGCGAGATGAAAGA
2	OsUBQ5-qRT	TCACCAGGCTCAGGAAGGAG	CAGATCAGAGCAAAGCGAGC
3	OsPR10-qRT	ATGAAGGAGAGGCTGGAGTTC	CCTTAGCCTTGGTGATCTCGT
4	OsWRKY45-qRT	ACGACATTATGGGTTTGAGCTT	GAGACGACACATCAACAAGGAA
5	OsActin-qRT	TCCATCTTGGCATCTCTCAG	GTACCCTCATCAGGCATCTG
6	OsRP1-qRT	GCACAGTGCAAGACCTTATTG	CAGCACTCTAGAGCTACATCC
7	OsRP2-qRT	GATATCTGATACCAGCACGGTG	ATAACTGCAGCATTCGAGAGC
8	OsRP5-qRT	GCACAGTGCAAGACCTTATTG	CAGCACTCTAGAGCTACATCC
9	OsRP6-qRT	CGAGTTCAAGTACGAGGCAC	GCTCTGGTCGGAACTTAAACC
10	MoPot2-qRT	ACGACCCGTCTTTACTTATTTGG	AAGTAGCGTTGGTTTTGTTGGAT
11	OsUbi-qRT	TTCTGGTCCTTCCACTTTCAG	ACGATTGATTTAACCAGTCCATGA
12	F-LUC-qRT	TTATGTCCGGTTATGTAAACAATCC	GACTTCAGGCGGTCAACGA
13	R-LUC-qRT	GCCTCGTGAAATCCCGTTAG	TCTTGGCACCTTCAACAATAGC

## Sheet: Probes
Sheet4. Probes used in this study.
Primer Name	Sequence	Modification
RP1-EMSA-P	GAAGAuuuuAuCAGGGAAACAGAAAGGGAAGAuGCCAAuGCAGuAGCAGAuAGCuAuuuuGAuGAGCuuG	3'Biotin
RP5-EMSA-P	CAACAuAAGGAGAAAuuuGACAuuAAuGuGuGGCuuACuGuGuCuCAAGCAuuuuCuGuGGAGGCuuuGCuGA	3'Biotin
