# Supplementary material
Source: Research Square preprint supplement (doi:10.21203/rs.3.rs-9320279/v1)
Supplement: Supplementary file 2 [file 256910a7232fac4484f6ddec.xlsx]

## Sheet: Sheet1
Sheet1. Sheet list
Sheet2. Enriched RNAs with gene annotation in MHZ9-N vs GFP by RNA immunoprecipitation sequencing. Rep1
Sheet3. Enriched RNAs with gene annotation in MHZ9-N vs GFP by RNA immunoprecipitation sequencing. Rep2

## Sheet: Sheet2
Sheet2. Enriched RNAs with gene annotation in MHZ9-N vs GFP by RNA immunoprecipitation sequencing. Rep1
Chrosome	Bed_start	Bed_end	Strand	Annotation	P-value	Gene_id
Chr1	73000	73050	+	CDS	0.00342474	LOC_Os01g01150	RNA recognition motif, putative, expressed
Chr1	73350	73400	+	CDS	0.0188481	LOC_Os01g01150	RNA recognition motif, putative, expressed
Chr1	1699400	1699450	+	CDS	0.00573083	LOC_Os01g03950	glycosyl hydrolase, family 31, putative, expressed
Chr1	1747600	1747650	+	CDS	0.0158981	LOC_Os01g04020	AP2 domain containing protein, expressed
Chr1	2036350	2036400	+	5'-UTR	0.029494	LOC_Os01g04550	expressed protein
Chr1	2297300	2297350	+	CDS	0.0188481	LOC_Os01g04950	peptide transporter PTR2, putative, expressed
Chr1	4095950	4096000	+	CDS	0.00961623	LOC_Os01g08350	ATP synthase subunit alpha, mitochondrial, putative, expressed
Chr1	4647100	4647150	+	CDS	0.0188481	LOC_Os01g09220	transposon protein, putative, CACTA, En/Spm sub-class, expressed
Chr1	4647200	4647250	+	CDS	0.000436938	LOC_Os01g09220	transposon protein, putative, CACTA, En/Spm sub-class, expressed
Chr1	4647800	4647850	+	CDS	0.029494	LOC_Os01g09220	transposon protein, putative, CACTA, En/Spm sub-class, expressed
Chr1	5478550	5478650	+	5'-UTR	0.00378043	LOC_Os01g10400	expressed protein
Chr1	5478800	5478900	+	5'-UTR	0.00587349	LOC_Os01g10400	expressed protein
Chr1	5479350	5479400	+	CDS	0.00556571	LOC_Os01g10400	expressed protein
Chr1	6248600	6248650	+	CDS	0.0188481	LOC_Os01g11580	bromodomain containing protein, expressed
Chr1	7030000	7030050	+	CDS	0.0331094	LOC_Os01g12710	oxidoreductase, short chain dehydrogenase/reductase family domain containing protein, expressed
Chr1	7061850	7061900	+	CDS	0.0188481	LOC_Os01g12760	cytochrome P450, putative, expressed
Chr1	7720450	7720500	+	3'-UTR	0.00573083	LOC_Os01g13760	dnaJ domain containing protein, expressed
Chr1	8130450	8130500	+	5'-UTR	0.000472845	LOC_Os01g14514	expressed protein
Chr1	9162300	9162350	+	CDS	0.0188481	LOC_Os01g16180	MT-A70 domain containing protein, expressed
Chr1	10134650	10134700	+	CDS	0.029494	LOC_Os01g18080	retrotransposon protein, putative, unclassified, expressed
Chr1	10626050	10626100	+	CDS	0.0188481	LOC_Os01g18800	CAMK_KIN1/SNF1/Nim1_like.9 - CAMK includes calcium/calmodulin depedent protein kinases, expressed
Chr1	10656050	10656100	+	CDS	0.0334401	LOC_Os01g18850	OsSPL1 - SBP-box gene family member, expressed
Chr1	14451900	14451950	+	CDS	0.0331094	LOC_Os01g25484	ferredoxin--nitrite reductase, putative, expressed
Chr1	14452250	14452300	+	CDS	0.00167292	LOC_Os01g25484	ferredoxin--nitrite reductase, putative, expressed
Chr1	14452400	14452450	+	CDS	0.0334401	LOC_Os01g25484	ferredoxin--nitrite reductase, putative, expressed
Chr1	17154250	17154300	+	5'-UTR	0.000130192	LOC_Os01g31360	expressed protein
Chr1	17157700	17157750	+	3'-UTR	0.0188481	LOC_Os01g31360	expressed protein
Chr1	17349950	17350000	+	CDS	2.44144e-09	LOC_Os01g31690	oxygen-evolving enhancer protein 1, chloroplast precursor, putative, expressed
Chr1	17350200	17350250	+	CDS	0.00179976	LOC_Os01g31690	oxygen-evolving enhancer protein 1, chloroplast precursor, putative, expressed
Chr1	17350350	17350400	+	CDS	0.0188481	LOC_Os01g31690	oxygen-evolving enhancer protein 1, chloroplast precursor, putative, expressed
Chr1	17350450	17350500	+	CDS	0.0303757	LOC_Os01g31690	oxygen-evolving enhancer protein 1, chloroplast precursor, putative, expressed
Chr1	20742250	20742300	+	3'-UTR	0.0334401	LOC_Os01g37130	protein phosphatase 2C, putative, expressed
Chr1	21426000	21426050	+	CDS	0.00488416	LOC_Os01g38229	peptidyl-prolyl isomerase, putative, expressed
Chr1	21430150	21430200	+	Intron	0.0188481	LOC_Os01g38229	peptidyl-prolyl isomerase, putative, expressed
Chr1	22605100	22605150	+	CDS	0.0454345	LOC_Os01g40070	expressed protein
Chr1	23607800	23607850	+	CDS	0.0105118	LOC_Os01g41710	chlorophyll A-B binding protein, putative, expressed
Chr1	23607900	23607950	+	CDS	4.19005e-05	LOC_Os01g41710	chlorophyll A-B binding protein, putative, expressed
Chr1	23608000	23608150	+	CDS	0.00630622	LOC_Os01g41710	chlorophyll A-B binding protein, putative, expressed
Chr1	25696700	25696750	+	5'-UTR	0.0179389	LOC_Os01g45274	carbonic anhydrase, chloroplast precursor, putative, expressed
Chr1	25696800	25696850	+	5'-UTR	0.0158981	LOC_Os01g45274	carbonic anhydrase, chloroplast precursor, putative, expressed
Chr1	25704600	25704700	+	CDS	0.00726087	LOC_Os01g45274	carbonic anhydrase, chloroplast precursor, putative, expressed
Chr1	26259900	26259950	+	Intron	0.0331094	LOC_Os01g46169	GDSL-like lipase/acylhydrolase, putative, expressed
Chr1	26260350	26260400	+	Intron	0.00911274	LOC_Os01g46169	GDSL-like lipase/acylhydrolase, putative, expressed
Chr1	26260850	26260900	+	Intron	0.029494	LOC_Os01g46169	GDSL-like lipase/acylhydrolase, putative, expressed
Chr1	26916300	26916350	+	CDS	0.00573083	LOC_Os01g47110	expressed protein
Chr1	27602000	27602050	+	5'-UTR	0.029494	LOC_Os01g48190	drought induced 19 protein, putative, expressed
Chr1	28080600	28080650	+	CDS	0.00573083	LOC_Os01g48930	splicing factor-related, putative, expressed
Chr1	28081600	28081650	+	CDS	0.0454345	LOC_Os01g48930	splicing factor-related, putative, expressed
Chr1	28574600	28574650	+	CDS	0.0121869	LOC_Os01g49740	expressed protein
Chr1	28740100	28740150	+	5'-UTR	0.0188481	LOC_Os01g50030	CPuORF25 - conserved peptide uORF-containing transcript, expressed
Chr1	28888200	28888250	+	CDS	0.0121869	LOC_Os01g50320	surp module family protein, putative, expressed
Chr1	28889300	28889350	+	CDS	0.00342474	LOC_Os01g50320	surp module family protein, putative, expressed
Chr1	29560350	29560400	+	5'-UTR	0.0184549	LOC_Os01g51410	glycine dehydrogenase, putative, expressed
Chr1	30031300	30031400	+	CDS	0.00922743	LOC_Os01g52240	chlorophyll A-B binding protein, putative, expressed
Chr1	30031550	30031650	+	CDS	4.83723e-05	LOC_Os01g52240	chlorophyll A-B binding protein, putative, expressed
Chr1	30169700	30169750	+	CDS	0.0188481	LOC_Os01g52500	NADP-dependent malic enzyme, putative, expressed
Chr1	32709000	32709050	+	3'-UTR	0.0200682	LOC_Os01g56670	glycosyl hydrolase family 47 domain contain protein, expressed
Chr1	32709100	32709150	+	3'-UTR	0.00335172	LOC_Os01g56670	glycosyl hydrolase family 47 domain contain protein, expressed
Chr1	33506150	33506250	+	5'-UTR	0.0148592	LOC_Os01g57960	retrotransposon protein, putative, unclassified, expressed
Chr1	33506400	33506450	+	5'-UTR	0.0295495	LOC_Os01g57960	retrotransposon protein, putative, unclassified, expressed
Chr1	33506550	33506600	+	5'-UTR	5.34359e-05	LOC_Os01g57960	retrotransposon protein, putative, unclassified, expressed
Chr1	33506650	33506700	+	5'-UTR	1.11022e-16	LOC_Os01g57960	retrotransposon protein, putative, unclassified, expressed
Chr1	33506800	33506950	+	5'-UTR	0.0114778	LOC_Os01g57960	retrotransposon protein, putative, unclassified, expressed
Chr1	33532050	33532150	+	5'-UTR	0.0264415	LOC_Os01g57968	expressed protein
Chr1	33532200	33532300	+	CDS	0.0256895	LOC_Os01g57968	expressed protein
Chr1	33532350	33532550	+	CDS	0.00276582	LOC_Os01g57968	expressed protein
Chr1	33532650	33532700	+	3'-UTR	6.93642e-07	LOC_Os01g57968	expressed protein
Chr1	33532750	33532800	+	3'-UTR	0.00076276	LOC_Os01g57968	expressed protein
Chr1	33532850	33532900	+	3'-UTR	0.00148061	LOC_Os01g57968	expressed protein
Chr1	33532950	33533100	+	3'-UTR	0.0085152	LOC_Os01g57968	expressed protein
Chr1	33533150	33533200	+	3'-UTR	0.0104079	LOC_Os01g57968	expressed protein
Chr1	33533350	33533450	+	3'-UTR	1.39511e-05	LOC_Os01g57968	expressed protein
Chr1	33533550	33533600	+	3'-UTR	0.0134405	LOC_Os01g57968	expressed protein
Chr1	33536600	33536650	+	CDS	0.0322474	LOC_Os01g57990	expressed protein
Chr1	33549700	33549750	+	CDS	0.00167292	LOC_Os01g58010	ATP synthase, A subunit family protein, putative, expressed
Chr1	33554500	33554600	+	CDS	0.0249137	LOC_Os01g58020	ribulose bisphosphate carboxylase large chain precursor, putative, expressed
Chr1	33578200	33578250	+	5'-UTR	0.00115445	LOC_Os01g58049	photosystem I assembly protein ycf4, putative, expressed
Chr1	35848150	35848200	+	CDS	0.00745309	LOC_Os01g61930	SAC3/GANP family protein, putative, expressed
Chr1	37697450	37697500	+	CDS	0.029494	LOC_Os01g64960	chlorophyll A-B binding protein, putative, expressed
Chr1	37792500	37792550	+	CDS	0.0188481	LOC_Os01g65100	peptide transporter, putative, expressed
Chr1	37807000	37807050	+	3'-UTR	0.029494	LOC_Os01g65130	peptide transporter, putative, expressed
Chr1	39546300	39546350	+	Intron	0.0422589	LOC_Os01g68020	BTBZ2 - Bric-a-Brac, Tramtrack, and Broad Complex BTB domain with TAZ zinc finger and Calmodulin-binding domains, expressed
Chr1	39547900	39547950	+	CDS	0.0407379	LOC_Os01g68020	BTBZ2 - Bric-a-Brac, Tramtrack, and Broad Complex BTB domain with TAZ zinc finger and Calmodulin-binding domains, expressed
Chr1	39548150	39548200	+	CDS	0.0260754	LOC_Os01g68020	BTBZ2 - Bric-a-Brac, Tramtrack, and Broad Complex BTB domain with TAZ zinc finger and Calmodulin-binding domains, expressed
Chr1	40131100	40131150	+	CDS	0.0121869	LOC_Os01g69050	lysine ketoglutarate reductase trans-splicing related 1, putative, expressed
Chr1	40700650	40700700	+	3'-UTR	0.010452	LOC_Os01g70270	auxin response factor, putative, expressed
Chr1	40812750	40812800	+	5'-UTR	0.0188481	LOC_Os01g70470	expressed protein
Chr1	41512800	41512850	+	5'-UTR	0.0219877	LOC_Os01g71630	#N/A
Chr1	41518750	41518800	+	CDS	0.00167292	LOC_Os01g71630	#N/A
Chr1	42441900	42441950	+	CDS	0.029494	LOC_Os01g73200	peroxidase precursor, putative, expressed
Chr1	43096500	43096550	+	5'-UTR	0.00224644	LOC_Os01g74410	MYB family transcription factor, putative, expressed
Chr1	43097200	43097250	+	CDS	0.0136319	LOC_Os01g74410	MYB family transcription factor, putative, expressed
Chr10	1534700	1534750	+	CDS	0.0454345	LOC_Os10g03550	expressed protein
Chr10	1534850	1534900	+	CDS	0.0429748	LOC_Os10g03550	expressed protein
Chr10	1858350	1858400	+	5'-UTR	0.00911274	LOC_Os10g04050	transposon protein, putative, CACTA, En/Spm sub-class, expressed
Chr10	1859550	1859600	+	5'-UTR	0.0328357	LOC_Os10g04050	transposon protein, putative, CACTA, En/Spm sub-class, expressed
Chr10	1862000	1862050	+	5'-UTR	0.0145973	LOC_Os10g04050	transposon protein, putative, CACTA, En/Spm sub-class, expressed
Chr10	7685350	7685400	+	5'-UTR	0.029494	LOC_Os10g14180	expressed protein
Chr10	7685800	7685850	+	Intron	0.0176264	LOC_Os10g14180	expressed protein
Chr10	10790050	10790150	+	CDS	0.00286542	LOC_Os10g21190	#N/A
Chr10	10790350	10790400	+	Intron	8.18394e-05	LOC_Os10g21190	#N/A
Chr10	10790500	10790550	+	Intron	3.06136e-06	LOC_Os10g21190	#N/A
Chr10	10790950	10791100	+	CDS	0.000854751	LOC_Os10g21190	#N/A
Chr10	10838200	10838250	+	CDS	0.0334401	LOC_Os10g21236	chloroplast ATP synthase a chain precursor, putative, expressed
Chr10	10839900	10839950	+	CDS	0.011806	LOC_Os10g21238	ATP synthase B chain, putative, expressed
Chr10	10840050	10840250	+	Intron	0.00940077	LOC_Os10g21238	ATP synthase B chain, putative, expressed
Chr10	10840300	10840400	+	Intron	0.0182748	LOC_Os10g21238	ATP synthase B chain, putative, expressed
Chr10	10840700	10840750	+	Intron	0.0077516	LOC_Os10g21238	ATP synthase B chain, putative, expressed
Chr10	10840950	10841000	+	CDS	0.0334401	LOC_Os10g21238	ATP synthase B chain, putative, expressed
Chr10	10841250	10841350	+	CDS	0.0171628	LOC_Os10g21238	ATP synthase B chain, putative, expressed
Chr10	10841400	10841450	+	CDS	0.0474717	LOC_Os10g21240	ATP synthase, putative, expressed
Chr10	10861150	10861200	+	5'-UTR	0.0408552	LOC_Os10g21268	ribulose bisphosphate carboxylase large chain precursor, putative, expressed
Chr10	10861300	10861350	+	CDS	5.04649e-07	LOC_Os10g21268	ribulose bisphosphate carboxylase large chain precursor, putative, expressed
Chr10	10861650	10861700	+	CDS	0.0179389	LOC_Os10g21268	ribulose bisphosphate carboxylase large chain precursor, putative, expressed
Chr10	10861850	10862000	+	CDS	0.011851	LOC_Os10g21268	ribulose bisphosphate carboxylase large chain precursor, putative, expressed
Chr10	10862050	10862150	+	CDS	0.00403849	LOC_Os10g21268	ribulose bisphosphate carboxylase large chain precursor, putative, expressed
Chr10	10862250	10862400	+	CDS	0.00315541	LOC_Os10g21268	ribulose bisphosphate carboxylase large chain precursor, putative, expressed
Chr10	10862550	10862600	+	CDS	3.50775e-05	LOC_Os10g21268	ribulose bisphosphate carboxylase large chain precursor, putative, expressed
Chr10	10908700	10908750	+	CDS	0.00573083	LOC_Os10g21394	NADPH-dependent oxidoreductase, putative, expressed
Chr10	10909000	10909050	+	CDS	0.0188481	LOC_Os10g21394	NADPH-dependent oxidoreductase, putative, expressed
Chr10	10910400	10910550	+	Intron	0.0141428	LOC_Os10g21396	NADPH-dependent oxidoreductase, putative, expressed
Chr10	10910800	10910850	+	Intron	0.0322474	LOC_Os10g21396	NADPH-dependent oxidoreductase, putative, expressed
Chr10	10919000	10919050	+	CDS	0.0165025	LOC_Os10g21418	NADPH-dependent oxidoreductase, putative, expressed
Chr10	10919100	10919150	+	CDS	0.00115055	LOC_Os10g21418	NADPH-dependent oxidoreductase, putative, expressed
Chr10	10919200	10919250	+	CDS	0.0282466	LOC_Os10g21418	NADPH-dependent oxidoreductase, putative, expressed
Chr10	10920650	10920750	+	CDS	0.0184736	LOC_Os10g21418	NADPH-dependent oxidoreductase, putative, expressed
Chr10	13013300	13013350	+	CDS	0.00573083	LOC_Os10g25200	expressed protein
Chr10	14534200	14534250	+	Intron	0.00573083	LOC_Os10g28020	OsPOP21 - Putative Prolyl Oligopeptidase homologue, expressed
Chr10	16793650	16793700	+	CDS	0.0188481	LOC_Os10g31970	SNF2 family N-terminal domain containing protein, expressed
Chr10	16793750	16793800	+	CDS	0.0188481	LOC_Os10g31970	SNF2 family N-terminal domain containing protein, expressed
Chr10	17262650	17262700	+	CDS	0.0188481	LOC_Os10g32980	CESA7 - cellulose synthase, expressed
Chr10	17262750	17262800	+	CDS	0.00573083	LOC_Os10g32980	CESA7 - cellulose synthase, expressed
Chr10	18903000	18903050	+	CDS	0.0165025	LOC_Os10g35370	oxidoreductase, short chain dehydrogenase/reductase family domain containing family, expressed
Chr10	19130150	19130200	+	CDS	0.0282466	LOC_Os10g35770	E2F-related protein, putative, expressed
Chr10	19380000	19380050	+	5'-UTR	0.0331094	LOC_Os10g36260	expressed protein
Chr10	19380150	19380200	+	5'-UTR	0.029494	LOC_Os10g36260	expressed protein
Chr10	19381100	19381150	+	CDS	0.00488416	LOC_Os10g36260	expressed protein
Chr10	19381300	19381350	+	CDS	0.00190915	LOC_Os10g36260	expressed protein
Chr10	19556400	19556450	+	CDS	0.00548247	LOC_Os10g36550	CRP3 - Cysteine-rich family protein precursor, expressed
Chr10	19895950	19896000	+	CDS	0.0331094	LOC_Os10g37180	glycine cleavage system H protein, putative, expressed
Chr10	20455550	20455600	+	CDS	0.0362458	LOC_Os10g38196	uncharacterized protein ycf68, putative
Chr10	20470100	20470200	+	Intron	0.000244011	LOC_Os10g38216	photosystem I assembly protein ycf3, putative, expressed
Chr10	20470300	20470450	+	Intron	6.85098e-05	LOC_Os10g38216	photosystem I assembly protein ycf3, putative, expressed
Chr10	20470600	20470650	+	Intron	0.00342949	LOC_Os10g38216	photosystem I assembly protein ycf3, putative, expressed
Chr10	20470900	20470950	+	CDS	0.0019363	LOC_Os10g38216	photosystem I assembly protein ycf3, putative, expressed
Chr10	20471000	20471100	+	CDS	0.00281907	LOC_Os10g38216	photosystem I assembly protein ycf3, putative, expressed
Chr10	20471350	20471400	+	Intron	0.029494	LOC_Os10g38216	photosystem I assembly protein ycf3, putative, expressed
Chr10	20471750	20471800	+	CDS	0.00637201	LOC_Os10g38216	photosystem I assembly protein ycf3, putative, expressed
Chr10	20475800	20475850	+	CDS	0.0336101	LOC_Os10g38234	photosystem I P700 chlorophyll a apoprotein A2, putative, expressed
Chr10	20477000	20477050	+	CDS	0.0176264	LOC_Os10g38234	photosystem I P700 chlorophyll a apoprotein A2, putative, expressed
Chr10	20863650	20863700	+	CDS	0.029494	LOC_Os10g39130	OsMADS56 - MADS-box family gene with MIKCc type-box, expressed
Chr10	20870400	20870450	+	CDS	0.0188481	LOC_Os10g39130	OsMADS56 - MADS-box family gene with MIKCc type-box, expressed
Chr10	21027650	21027700	+	Intron	0.029494	LOC_Os10g39420	CAMK_CAMK_like.8 - CAMK includes calcium/calmodulin depedent protein kinases, expressed
Chr10	21203550	21203600	+	CDS	0.0188481	LOC_Os10g39670	protein kinase family protein, putative, expressed
Chr10	21953700	21953750	+	5'-UTR	0.000267334	LOC_Os10g40824	expressed protein
Chr10	22254900	22254950	+	CDS	0.0334401	LOC_Os10g41400	peptide methionine sulfoxide reductase, putative, expressed
Chr10	22858650	22858700	+	CDS	0.0331094	LOC_Os10g42430	transcription factor MYC7E, putative, expressed
Chr11	85700	85750	+	CDS	0.0334401	LOC_Os11g01140	AGC_PVPK_like_kin82y.18 - ACG kinases include homologs to PKA, PKG and PKC, expressed
Chr11	88100	88150	+	CDS	0.0331094	LOC_Os11g01140	AGC_PVPK_like_kin82y.18 - ACG kinases include homologs to PKA, PKG and PKC, expressed
Chr11	88250	88300	+	CDS	0.0331094	LOC_Os11g01140	AGC_PVPK_like_kin82y.18 - ACG kinases include homologs to PKA, PKG and PKC, expressed
Chr11	89150	89200	+	CDS	0.00573083	LOC_Os11g01140	AGC_PVPK_like_kin82y.18 - ACG kinases include homologs to PKA, PKG and PKC, expressed
Chr11	5442050	5442100	+	5'-UTR	0.0331094	LOC_Os11g10090	transposon protein, putative, CACTA, En/Spm sub-class, expressed
Chr11	5444450	5444500	+	Intron	0.0334401	LOC_Os11g10090	transposon protein, putative, CACTA, En/Spm sub-class, expressed
Chr11	5462000	5462050	+	5'-UTR	0.0121869	LOC_Os11g10100	STE_MEKK_ste11_MAP3K.3 - STE kinases include homologs to sterile 7, sterile 11 and sterile 20 from yeast, expressed
Chr11	5464250	5464300	+	CDS	0.0188481	LOC_Os11g10100	STE_MEKK_ste11_MAP3K.3 - STE kinases include homologs to sterile 7, sterile 11 and sterile 20 from yeast, expressed
Chr11	6065700	6065750	+	3'-UTR	0.029494	LOC_Os11g10980	pyruvate kinase, putative, expressed
Chr11	6614286	6614336	+	CDS	0.0381759	LOC_Os11g11920	resistance protein, putative, expressed
Chr11	7661100	7661150	+	CDS	0.00741535	LOC_Os11g13890	chlorophyll A-B binding protein, putative, expressed
Chr11	7661700	7661900	+	3'-UTR	0.0158676	LOC_Os11g13890	chlorophyll A-B binding protein, putative, expressed
Chr11	8467450	8467500	+	5'-UTR	0.0422589	LOC_Os11g15040	S-adenosyl-L-methionine:benzoic acid/salicylic acid carboxyl methyltransferase, putative, expressed
Chr11	8467650	8467700	+	5'-UTR	0.000101884	LOC_Os11g15040	S-adenosyl-L-methionine:benzoic acid/salicylic acid carboxyl methyltransferase, putative, expressed
Chr11	8467800	8467900	+	5'-UTR	0.0288107	LOC_Os11g15040	S-adenosyl-L-methionine:benzoic acid/salicylic acid carboxyl methyltransferase, putative, expressed
Chr11	9178150	9178200	+	CDS	0.00573083	LOC_Os11g16550	uncharacterized protein ycf53, putative, expressed
Chr11	9627250	9627300	+	5'-UTR	0.0121869	LOC_Os11g17290	expressed protein
Chr11	9628550	9628600	+	5'-UTR	0.00916041	LOC_Os11g17290	expressed protein
Chr11	9630400	9630450	+	CDS	0.0304447	LOC_Os11g17290	expressed protein
Chr11	9630550	9630600	+	CDS	0.00681198	LOC_Os11g17290	expressed protein
Chr11	9631050	9631100	+	CDS	0.0182491	LOC_Os11g17290	expressed protein
Chr11	9633500	9633550	+	3'-UTR	0.00573083	LOC_Os11g17290	expressed protein
Chr11	10889200	10889250	+	CDS	0.0188481	LOC_Os11g19100	retrotransposon protein, putative, unclassified, expressed
Chr11	14713700	14713750	+	CDS	0.0176264	LOC_Os11g25780	PB1 domain containing protein, expressed
Chr11	19863750	19863850	+	Intron	0.0315305	LOC_Os11g33970	plant protein of unknown function domain containing protein, expressed
Chr11	20070000	20070050	+	Intron	0.0328357	LOC_Os11g34270	ubiquitin carboxyl-terminal hydrolase domain containing protein, expressed
Chr11	20436750	20436800	+	CDS	0.0121869	LOC_Os11g34870	expressed protein
Chr11	22863600	22863650	+	CDS	0.0121869	LOC_Os11g38580	NBS-LRR type disease resistance protein, putative, expressed
Chr11	23231350	23231400	+	CDS	0.0331094	LOC_Os11g39020	ABC transporter, ATP-binding protein, putative, expressed
Chr11	23336750	23336800	+	CDS	0.0176264	LOC_Os11g39190	NB-ARC domain containing protein, putative, expressed
Chr11	24562400	24562450	+	5'-UTR	0.0407379	LOC_Os11g41034	expressed protein
Chr11	27270050	27270100	+	CDS	6.21192e-07	LOC_Os11g45060	NB-ARC domain containing protein, expressed
Chr11	27724650	27724700	+	Intron	0.0188481	LOC_Os11g45820	expressed protein
Chr11	27998750	27998800	+	CDS	0.0188481	LOC_Os11g46240	retrotransposon protein, putative, unclassified, expressed
Chr11	28031500	28031550	+	CDS	0.00573083	LOC_Os11g46300	expressed protein
Chr11	28807550	28807600	+	CDS	0.00167292	LOC_Os11g47760	DnaK family protein, putative, expressed
Chr11	28807650	28807700	+	CDS	0.0322474	LOC_Os11g47760	DnaK family protein, putative, expressed
Chr11	28973550	28973600	+	CDS	0.029494	LOC_Os11g48060	laccase-22 precursor, putative, expressed
Chr12	646200	646250	+	CDS	0.0188481	LOC_Os12g02130	expressed protein
Chr12	3542900	3542950	+	CDS	0.00573083	LOC_Os12g07210	expressed protein
Chr12	5614250	5614300	+	CDS	0.0351681	LOC_Os12g10580	ribulose bisphosphate carboxylase large chain precursor, putative, expressed
Chr12	5614500	5614550	+	CDS	0.0407379	LOC_Os12g10580	ribulose bisphosphate carboxylase large chain precursor, putative, expressed
Chr12	5614700	5614850	+	CDS	0.00083703	LOC_Os12g10580	ribulose bisphosphate carboxylase large chain precursor, putative, expressed
Chr12	5615200	5615300	+	CDS	0.0404747	LOC_Os12g10580	ribulose bisphosphate carboxylase large chain precursor, putative, expressed
Chr12	5652350	5652400	+	CDS	0.0188481	LOC_Os12g10604	retrotransposon protein, putative, unclassified
Chr12	5653500	5653600	+	Intron	0.0201289	LOC_Os12g10604	retrotransposon protein, putative, unclassified
Chr12	9352650	9352700	+	CDS	0.0334401	LOC_Os12g16350	enoyl-CoA hydratase/isomerase family protein, putative, expressed
Chr12	10293950	10294000	+	CDS	0.0334401	LOC_Os12g17910	T-complex protein, putative, expressed
Chr12	10772500	10772550	+	5'-UTR	0.0188481	LOC_Os12g18650	Regulator of chromosome condensation domain containing protein, expressed
Chr12	10823450	10823500	+	5'-UTR	0.0331094	LOC_Os12g18729	expressed protein
Chr12	10832200	10832250	+	CDS	0.0331094	LOC_Os12g18729	expressed protein
Chr12	11320550	11320600	+	5'-UTR	0.0165401	LOC_Os12g19470	ribulose bisphosphate carboxylase small chain, chloroplast precursor, putative, expressed
Chr12	11320700	11320750	+	CDS	0.0477713	LOC_Os12g19470	ribulose bisphosphate carboxylase small chain, chloroplast precursor, putative, expressed
Chr12	11321050	11321100	+	CDS	0.0188481	LOC_Os12g19470	ribulose bisphosphate carboxylase small chain, chloroplast precursor, putative, expressed
Chr12	11414300	11414350	+	Intron	0.00573083	LOC_Os12g19580	photosynthetic reaction center protein, putative, expressed
Chr12	13116900	13116950	+	CDS	0.0429748	LOC_Os12g23200	photosystem I reaction center subunit XI, chloroplast precursor, putative, expressed
Chr12	13178200	13178250	+	CDS	0.0158981	LOC_Os12g23280	heavy metal-associated domain containing protein, expressed
Chr12	19158850	19158900	+	CDS	0.0188481	LOC_Os12g31840	ZOS12-05 - C2H2 zinc finger protein, expressed
Chr12	20499150	20499200	+	CDS	0.0331094	LOC_Os12g33956	#N/A
Chr12	20503600	20503700	+	Intron	0.0234197	LOC_Os12g33958	NADH-ubiquinone oxidoreductase 49 kDa subunit, putative, expressed
Chr12	20503750	20503850	+	Intron	0.00866828	LOC_Os12g33958	NADH-ubiquinone oxidoreductase 49 kDa subunit, putative, expressed
Chr12	20504200	20504500	+	CDS	0.00734645	LOC_Os12g33958	NADH-ubiquinone oxidoreductase 49 kDa subunit, putative, expressed
Chr12	20504550	20504650	+	Intron	0.00121105	LOC_Os12g33958	NADH-ubiquinone oxidoreductase 49 kDa subunit, putative, expressed
Chr12	20504700	20504750	+	Intron	9.49276e-06	LOC_Os12g33958	NADH-ubiquinone oxidoreductase 49 kDa subunit, putative, expressed
Chr12	20504800	20504850	+	Intron	0.00160304	LOC_Os12g33958	NADH-ubiquinone oxidoreductase 49 kDa subunit, putative, expressed
Chr12	20505150	20505200	+	Intron	0.0331094	LOC_Os12g33958	NADH-ubiquinone oxidoreductase 49 kDa subunit, putative, expressed
Chr12	20505450	20505500	+	Intron	0.000356152	LOC_Os12g33958	NADH-ubiquinone oxidoreductase 49 kDa subunit, putative, expressed
Chr12	20505900	20506000	+	CDS	0.0147779	LOC_Os12g33958	NADH-ubiquinone oxidoreductase 49 kDa subunit, putative, expressed
Chr12	20506300	20506400	+	Intron	0.0156673	LOC_Os12g33958	NADH-ubiquinone oxidoreductase 49 kDa subunit, putative, expressed
Chr12	20506900	20506950	+	Intron	0.0322474	LOC_Os12g33958	NADH-ubiquinone oxidoreductase 49 kDa subunit, putative, expressed
Chr12	20507650	20507950	+	Intron	0.00946855	LOC_Os12g33958	NADH-ubiquinone oxidoreductase 49 kDa subunit, putative, expressed
Chr12	20508800	20508850	+	Intron	0.0219877	LOC_Os12g33958	NADH-ubiquinone oxidoreductase 49 kDa subunit, putative, expressed
Chr12	20509050	20509250	+	CDS	0.0221007	LOC_Os12g33958	NADH-ubiquinone oxidoreductase 49 kDa subunit, putative, expressed
Chr12	20532050	20532100	+	5'-UTR	0.0019363	LOC_Os12g34010	expressed protein
Chr12	20532750	20532800	+	3'-UTR	0.000634636	LOC_Os12g34010	expressed protein
Chr12	20533250	20533300	+	CDS	0.00488416	LOC_Os12g34012	cytochrome c biosynthesis ccmC-like mitochondrial protein, putative, expressed
Chr12	20578300	20578350	+	5'-UTR	0.0334401	LOC_Os12g34054	mitochondrial ribosomal protein S3, putative, expressed
Chr12	20578550	20578600	+	Intron	0.011806	LOC_Os12g34054	mitochondrial ribosomal protein S3, putative, expressed
Chr12	20578850	20578950	+	Intron	0.0250065	LOC_Os12g34054	mitochondrial ribosomal protein S3, putative, expressed
Chr12	20579350	20579400	+	Intron	0.0188481	LOC_Os12g34054	mitochondrial ribosomal protein S3, putative, expressed
Chr12	20580450	20580500	+	CDS	0.0334401	LOC_Os12g34054	mitochondrial ribosomal protein S3, putative, expressed
Chr12	20581700	20581750	+	CDS	0.00463417	LOC_Os12g34054	mitochondrial ribosomal protein S3, putative, expressed
Chr12	20582150	20582200	+	CDS	0.0176264	LOC_Os12g34056	mitochondrial 60S ribosomal protein L16, putative, expressed
Chr12	20618350	20618700	+	CDS	0.00540327	LOC_Os12g34094	NADH-ubiquinone oxidoreductase chain 4, putative, expressed
Chr12	20618800	20618950	+	Intron	0.0211012	LOC_Os12g34094	NADH-ubiquinone oxidoreductase chain 4, putative, expressed
Chr12	20619200	20619250	+	Intron	0.0100418	LOC_Os12g34094	NADH-ubiquinone oxidoreductase chain 4, putative, expressed
Chr12	20619400	20619450	+	Intron	0.0165025	LOC_Os12g34094	NADH-ubiquinone oxidoreductase chain 4, putative, expressed
Chr12	20619500	20619550	+	Intron	0.00405808	LOC_Os12g34094	NADH-ubiquinone oxidoreductase chain 4, putative, expressed
Chr12	20620900	20620950	+	Intron	0.0176264	LOC_Os12g34094	NADH-ubiquinone oxidoreductase chain 4, putative, expressed
Chr12	20622000	20622150	+	Intron	0.000531271	LOC_Os12g34094	NADH-ubiquinone oxidoreductase chain 4, putative, expressed
Chr12	20623500	20623600	+	Intron	0.0215275	LOC_Os12g34094	NADH-ubiquinone oxidoreductase chain 4, putative, expressed
Chr12	20675850	20675900	+	CDS	0.0454345	LOC_Os12g34124	mitochondrial ribosomal protein S3, putative, expressed
Chr12	20679000	20679050	+	CDS	0.0331094	LOC_Os12g34124	mitochondrial ribosomal protein S3, putative, expressed
Chr12	20679200	20679250	+	CDS	0.00488416	LOC_Os12g34124	mitochondrial ribosomal protein S3, putative, expressed
Chr12	21107300	21107350	+	CDS	0.0188481	LOC_Os12g34770	retrotransposon protein, putative, Ty1-copia subclass, expressed
Chr12	21662750	21662800	+	CDS	0.0188481	LOC_Os12g35630	elongation factor TS family protein, expressed
Chr12	21664550	21664600	+	CDS	0.00573083	LOC_Os12g35630	elongation factor TS family protein, expressed
Chr12	22100850	22100900	+	5'-UTR	0.0188481	LOC_Os12g36060	expressed protein
Chr12	24871900	24871950	+	CDS	0.0158981	LOC_Os12g40180	expressed protein
Chr12	26650200	26650250	+	CDS	0.00573083	LOC_Os12g42876	5-methyltetrahydropteroyltriglutamate--homocysteine methyltransferase, putative, expressed
Chr12	27060300	27060350	+	5'-UTR	0.0358106	LOC_Os12g43600	RNA recognition motif containing protein, expressed
Chr12	27060400	27060450	+	CDS	1.11022e-16	LOC_Os12g43600	RNA recognition motif containing protein, expressed
Chr12	27060600	27060700	+	CDS	0.018494	LOC_Os12g43600	RNA recognition motif containing protein, expressed
Chr2	1388000	1388050	+	5'-UTR	0.0331094	LOC_Os02g03410	CAMK_CAMK_like.12 - CAMK includes calcium/calmodulin depedent protein kinases, expressed
Chr2	1388150	1388200	+	CDS	0.0188481	LOC_Os02g03410	CAMK_CAMK_like.12 - CAMK includes calcium/calmodulin depedent protein kinases, expressed
Chr2	1620100	1620150	+	CDS	0.0121869	LOC_Os02g03840	expressed protein
Chr2	1623050	1623100	+	CDS	0.0188481	LOC_Os02g03840	expressed protein
Chr2	1625250	1625300	+	CDS	0.00295731	LOC_Os02g03840	expressed protein
Chr2	1625600	1625650	+	CDS	0.0158981	LOC_Os02g03840	expressed protein
Chr2	2639150	2639200	+	CDS	0.029494	LOC_Os02g05470	CCT motif family protein, expressed
Chr2	3790600	3790650	+	3'-UTR	0.0188481	LOC_Os02g07340	HEAT repeat family protein, putative, expressed
Chr2	3791500	3791550	+	3'-UTR	0.0121869	LOC_Os02g07340	HEAT repeat family protein, putative, expressed
Chr2	4280700	4280750	+	CDS	0.029494	LOC_Os02g08100	AMP-binding domain containing protein, expressed
Chr2	6903350	6903400	+	3'-UTR	0.00573083	LOC_Os02g13020	expressed protein
Chr2	7145000	7145050	+	5'-UTR	0.00573083	LOC_Os02g13400	expressed protein
Chr2	8197950	8198000	+	CDS	0.0331094	LOC_Os02g14780	splicing factor 3 subunit 1, putative, expressed
Chr2	10007850	10007900	+	CDS	0.00167292	LOC_Os02g17390	3-hydroxyacyl-CoA dehydrogenase, putative, expressed
Chr2	13157550	13157650	+	CDS	0.0125397	LOC_Os02g22100	OsRhmbd6 - Putative Rhomboid homologue, expressed
Chr2	13966450	13966500	+	CDS	0.00167292	LOC_Os02g24100	expressed protein
Chr2	14116500	14116550	+	CDS	0.029494	LOC_Os02g24330	eukaryotic translation initiation factor 4B, putative, expressed
Chr2	14247750	14247900	+	CDS	0.0109204	LOC_Os02g24586	uncharacterized protein ycf68, putative, expressed
Chr2	15891800	15891850	+	CDS	0.0331094	LOC_Os02g27030	cysteine proteinase 1 precursor, putative, expressed
Chr2	15912500	15912550	+	CDS	0.029494	LOC_Os02g27060	high mobility group, putative, expressed
Chr2	18236050	18236100	+	5'-UTR	0.0322474	LOC_Os02g30630	thiamine pyrophosphate enzyme, C-terminal TPP binding domain containing protein, expressed
Chr2	18254000	18254050	+	CDS	0.0188481	LOC_Os02g30650	heavy metal-associated domain containing protein, expressed
Chr2	21977150	21977200	+	CDS	0.0188481	LOC_Os02g36380	FAD binding domain of DNA photolyase domain containing protein, expressed
Chr2	23562900	23562950	+	CDS	0.0334401	LOC_Os02g39010	cyclin-dependent kinase G-1, putative, expressed
Chr2	23759600	23759650	+	CDS	0.0266428	LOC_Os02g39360	B-box zinc finger family protein, putative, expressed
Chr2	24350750	24350800	+	5'-UTR	0.0158981	LOC_Os02g40240	receptor kinase, putative, expressed
Chr2	24351000	24351050	+	5'-UTR	0.00241975	LOC_Os02g40240	receptor kinase, putative, expressed
Chr2	25432150	25432200	+	CDS	0.029494	LOC_Os02g42290	OsClp3 - Putative Clp protease homologue, expressed
Chr2	26263450	26263500	+	3'-UTR	0.00280224	LOC_Os02g43519	expressed protein
Chr2	26264750	26264800	+	3'-UTR	0.0407379	LOC_Os02g43519	expressed protein
Chr2	27183800	27183850	+	CDS	0.0188481	LOC_Os02g44880	expressed protein
Chr2	28763150	28763200	+	CDS	0.0188481	LOC_Os02g47120	region found in RelA/SpoT proteins containing protein, expressed
Chr2	28996800	28996850	+	CDS	0.0188481	LOC_Os02g47470	cytochrome P450, putative, expressed
Chr2	29757150	29757250	+	Intron	0.00239935	LOC_Os02g48610	mitochondrial import inner membrane translocase subunit Tim17, putative, expressed
Chr2	31082200	31082250	+	CDS	0.00573083	LOC_Os02g50850	BAH domain containing protein, putative, expressed
Chr2	31202300	31202350	+	5'-UTR	0.00573083	LOC_Os02g51020	expressed protein
Chr2	31202500	31202550	+	CDS	0.0322474	LOC_Os02g51020	expressed protein
Chr2	31203200	31203250	+	CDS	0.0188481	LOC_Os02g51020	expressed protein
Chr2	31648900	31648950	+	5'-UTR	0.00167292	LOC_Os02g51670	ethylene-responsive transcription factor, putative, expressed
Chr2	31649150	31649200	+	CDS	0.0381759	LOC_Os02g51670	ethylene-responsive transcription factor, putative, expressed
Chr2	31649700	31649750	+	CDS	0.000273447	LOC_Os02g51670	ethylene-responsive transcription factor, putative, expressed
Chr2	32560950	32561000	+	CDS	0.000472845	LOC_Os02g53180	1-aminocyclopropane-1-carboxylate oxidase protein, putative, expressed
Chr2	33569550	33569600	+	5'-UTR	0.0188481	LOC_Os02g54820	trehalose-6-phosphate synthase, putative, expressed
Chr2	33570100	33570150	+	CDS	0.029494	LOC_Os02g54820	trehalose-6-phosphate synthase, putative, expressed
Chr2	34412100	34412150	+	CDS	0.00573083	LOC_Os02g56250	GATA zinc finger domain containing protein, expressed
Chr2	35093050	35093100	+	3'-UTR	0.0245837	LOC_Os02g57280	CBS domain containing membrane protein, putative, expressed
Chr2	35093200	35093250	+	3'-UTR	0.0197638	LOC_Os02g57280	CBS domain containing membrane protein, putative, expressed
Chr2	35558350	35558400	+	CDS	0.00745309	LOC_Os02g58090	PSP domain containing protein, expressed
Chr3	263000	263050	+	5'-UTR	0.010452	LOC_Os03g01350	expressed protein
Chr3	572450	572500	+	CDS	0.0322474	LOC_Os03g01930	retrotransposon protein, putative, unclassified, expressed
Chr3	720250	720300	+	3'-UTR	0.0188481	LOC_Os03g02160	zinc finger C-x8-C-x5-C-x3-H type family protein, expressed
Chr3	1664900	1664950	+	CDS	0.0365497	LOC_Os03g03720	glyceraldehyde-3-phosphate dehydrogenase, putative, expressed
Chr3	1665200	1665250	+	3'-UTR	0.0322474	LOC_Os03g03720	glyceraldehyde-3-phosphate dehydrogenase, putative, expressed
Chr3	2144100	2144150	+	Intron	0.0356664	LOC_Os03g04590	ribosomal protein, putative, expressed
Chr3	3716700	3716750	+	CDS	0.0188481	LOC_Os03g07300	ribulose-phosphate 3-epimerase, chloroplast precursor, putative, expressed
Chr3	4329150	4329200	+	CDS	0.0260754	LOC_Os03g08430	SAC domain containing protein, putative, expressed
Chr3	4660850	4660900	+	5'-UTR	0.029494	LOC_Os03g08970	expressed protein
Chr3	5422750	5422800	+	CDS	0.0109668	LOC_Os03g10620	hydrolase, alpha/beta fold family domain containing protein, expressed
Chr3	5422900	5422950	+	CDS	0.000437514	LOC_Os03g10620	hydrolase, alpha/beta fold family domain containing protein, expressed
Chr3	5423350	5423450	+	CDS	0.0217195	LOC_Os03g10620	hydrolase, alpha/beta fold family domain containing protein, expressed
Chr3	5424950	5425000	+	Intron	0.00167292	LOC_Os03g10620	hydrolase, alpha/beta fold family domain containing protein, expressed
Chr3	5972650	5972700	+	3'-UTR	0.00190915	LOC_Os03g11520	expressed protein
Chr3	6081500	6081550	+	CDS	0.0188481	LOC_Os03g11650	ATMAP70 protein, putative, expressed
Chr3	6228600	6228650	+	CDS	0.010452	LOC_Os03g11890	potyvirus VPg interacting protein, putative, expressed
Chr3	6229000	6229050	+	CDS	0.00167292	LOC_Os03g11890	potyvirus VPg interacting protein, putative, expressed
Chr3	6754300	6754350	+	5'-UTR	0.0158981	LOC_Os03g12670	expressed protein
Chr3	6754450	6754550	+	5'-UTR	0.025272	LOC_Os03g12670	expressed protein
Chr3	6754650	6754700	+	5'-UTR	0.00597674	LOC_Os03g12670	expressed protein
Chr3	6754950	6755000	+	5'-UTR	0.0219877	LOC_Os03g12670	expressed protein
Chr3	6755150	6755200	+	CDS	0.00342474	LOC_Os03g12670	expressed protein
Chr3	6949950	6950000	+	CDS	0.0188481	LOC_Os03g12890	aminotransferase domain containing protein, putative, expressed
Chr3	7231050	7231100	+	CDS	0.0188481	LOC_Os03g13390	oxidoreductase, aldo/keto reductase family protein, putative, expressed
Chr3	7482150	7482200	+	CDS	0.00167292	LOC_Os03g13810	expressed protein
Chr3	7669800	7669850	+	CDS	0.0188481	LOC_Os03g14110	expressed protein
Chr3	9248500	9248550	+	5'-UTR	0.0121869	LOC_Os03g16700	initiator-binding protein, putative, expressed
Chr3	9403400	9403450	+	CDS	0.0188481	LOC_Os03g16910	SLT1 protein, putative, expressed
Chr3	9404200	9404250	+	CDS	0.029494	LOC_Os03g16910	SLT1 protein, putative, expressed
Chr3	9872400	9872450	+	5'-UTR	0.0331094	LOC_Os03g17740	transporter, putative, expressed
Chr3	9872500	9872550	+	CDS	0.0181398	LOC_Os03g17740	transporter, putative, expressed
Chr3	10120650	10120750	+	3'-UTR	0.00746298	LOC_Os03g18120	proteins of unknown function domain containing protein, expressed
Chr3	10502300	10502350	+	CDS	0.0188481	LOC_Os03g18740	oxidoreductase, short chain dehydrogenase/reductase family, putative, expressed
Chr3	10651700	10651750	+	5'-UTR	0.0158981	LOC_Os03g19020	PHD-finger family protein, expressed
Chr3	10651950	10652000	+	CDS	0.0181398	LOC_Os03g19020	PHD-finger family protein, expressed
Chr3	10652150	10652250	+	CDS	0.0155175	LOC_Os03g19020	PHD-finger family protein, expressed
Chr3	10910800	10910850	+	CDS	0.0173308	LOC_Os03g19380	calvin cycle protein CP12, putative, expressed
Chr3	11113600	11113650	+	Intron	0.0407379	LOC_Os03g19760	HAD-superfamily hydrolase, subfamily IA, variant 3 containing protein, expressed
Chr3	11374750	11374800	+	CDS	0.029494	LOC_Os03g20140	transposon protein, putative, CACTA, En/Spm sub-class, expressed
Chr3	11523750	11523800	+	CDS	0.0188481	LOC_Os03g20370	OsCam1-1 - Calmodulin, expressed
Chr3	11713200	11713300	+	CDS	0.0437276	LOC_Os03g20700	magnesium-chelatase, putative, expressed
Chr3	11713550	11713650	+	CDS	0.00974303	LOC_Os03g20700	magnesium-chelatase, putative, expressed
Chr3	11715350	11715400	+	CDS	0.0179259	LOC_Os03g20700	magnesium-chelatase, putative, expressed
Chr3	11715900	11716000	+	CDS	0.0212764	LOC_Os03g20700	magnesium-chelatase, putative, expressed
Chr3	11716250	11716300	+	CDS	0.0287089	LOC_Os03g20700	magnesium-chelatase, putative, expressed
Chr3	11718450	11718500	+	CDS	0.00745309	LOC_Os03g20700	magnesium-chelatase, putative, expressed
Chr3	11771300	11771350	+	CDS	0.0105112	LOC_Os03g20780	ethylene-insensitive 3, putative, expressed
Chr3	12357100	12357150	+	CDS	0.0188481	LOC_Os03g21640	expressed protein
Chr3	12402450	12402500	+	CDS	0.0188481	LOC_Os03g21720	vacuolar-sorting receptor precursor, putative, expressed
Chr3	12403900	12403950	+	CDS	0.0188481	LOC_Os03g21720	vacuolar-sorting receptor precursor, putative, expressed
Chr3	13283650	13283750	+	CDS	0.00738598	LOC_Os03g23010	expressed protein
Chr3	14034650	14034700	+	Intron	0.000130192	LOC_Os03g24640	terpene synthase, putative, expressed
Chr3	14208200	14208250	+	CDS	0.0181398	LOC_Os03g24930	tyrosine protein kinase domain containing protein, putative, expressed
Chr3	14208450	14208500	+	CDS	0.00167292	LOC_Os03g24930	tyrosine protein kinase domain containing protein, putative, expressed
Chr3	15988450	15988500	+	CDS	0.00573083	LOC_Os03g27840	splicing factor, arginine/serine-rich 16, putative, expressed
Chr3	15990100	15990150	+	CDS	0.000472845	LOC_Os03g27840	splicing factor, arginine/serine-rich 16, putative, expressed
Chr3	15990200	15990250	+	CDS	0.0334401	LOC_Os03g27840	splicing factor, arginine/serine-rich 16, putative, expressed
Chr3	16283200	16283250	+	5'-UTR	0.0266428	LOC_Os03g28300	protein kinase domain containing protein, expressed
Chr3	16283950	16284000	+	CDS	0.0331094	LOC_Os03g28300	protein kinase domain containing protein, expressed
Chr3	16287650	16287700	+	3'-UTR	0.00573083	LOC_Os03g28300	protein kinase domain containing protein, expressed
Chr3	17738800	17738850	+	CDS	0.0188481	LOC_Os03g31150	expressed protein
Chr3	17939650	17939700	+	5'-UTR	0.0188481	LOC_Os03g31490	expressed protein
Chr3	20379900	20379950	+	CDS	0.000472845	LOC_Os03g36750	cbbY, putative, expressed
Chr3	20381100	20381150	+	CDS	9.28e-06	LOC_Os03g36750	cbbY, putative, expressed
Chr3	22000550	22000600	+	CDS	0.0328357	LOC_Os03g39610	chlorophyll A-B binding protein, putative, expressed
Chr3	22000650	22000950	+	CDS	0.00782717	LOC_Os03g39610	chlorophyll A-B binding protein, putative, expressed
Chr3	22001000	22001050	+	3'-UTR	0.029494	LOC_Os03g39610	chlorophyll A-B binding protein, putative, expressed
Chr3	23659450	23659500	+	Intron	0.0165025	LOC_Os03g42530	retrotransposon, putative, centromere-specific, expressed
Chr3	25129700	25129750	+	CDS	0.00573083	LOC_Os03g44620	chaperone protein dnaJ, putative, expressed
Chr3	26460700	26460750	+	CDS	0.0282466	LOC_Os03g46770	RNA recognition motif containing protein, expressed
Chr3	27851700	27851750	+	CDS	0.00488416	LOC_Os03g48904	expressed protein
Chr3	28687200	28687250	+	CDS	0.0188481	LOC_Os03g50310	CCT/B-box zinc finger protein, putative, expressed
Chr3	28687900	28687950	+	CDS	0.0188481	LOC_Os03g50310	CCT/B-box zinc finger protein, putative, expressed
Chr3	28906700	28906750	+	3'-UTR	0.0121869	LOC_Os03g50620	ATP binding protein, putative, expressed
Chr3	29057700	29057750	+	CDS	0.0188481	LOC_Os03g50860	histidine kinase, putative, expressed
Chr3	30003350	30003400	+	5'-UTR	0.00745309	LOC_Os03g52239	homeobox domain containing protein, expressed
Chr3	30003600	30003650	+	5'-UTR	0.00463417	LOC_Os03g52239	homeobox domain containing protein, expressed
Chr3	30006500	30006550	+	CDS	0.0121869	LOC_Os03g52239	homeobox domain containing protein, expressed
Chr3	30856450	30856500	+	CDS	0.0295495	LOC_Os03g53800	periplasmic beta-glucosidase precursor, putative, expressed
Chr3	31725200	31725250	+	5'-UTR	0.010452	LOC_Os03g55720	cytochrome b6f complex subunit, putative, expressed
Chr3	32630850	32630900	+	CDS	0.0331094	LOC_Os03g57220	hydroxyacid oxidase 1, putative, expressed
Chr3	32630950	32631000	+	CDS	0.029494	LOC_Os03g57220	hydroxyacid oxidase 1, putative, expressed
Chr3	32632000	32632050	+	CDS	0.0271255	LOC_Os03g57220	hydroxyacid oxidase 1, putative, expressed
Chr3	34032650	34032700	+	CDS	0.0188481	LOC_Os03g59760	RING finger protein 126, putative, expressed
Chr3	34166700	34166750	+	Intron	0.00167292	LOC_Os03g60080	NAC domain-containing protein 67, putative, expressed
Chr3	34175850	34175900	+	CDS	0.0188481	LOC_Os03g60100	50S ribosomal protein L17, putative, expressed
Chr3	35648200	35648250	+	5'-UTR	0.0158981	LOC_Os03g63040	expressed protein
Chr3	35650750	35650800	+	CDS	0.0303757	LOC_Os03g63040	expressed protein
Chr3	36134150	36134200	+	3'-UTR	3.50775e-05	LOC_Os03g63950	plastid-specific 30S ribosomal protein 1, chloroplast precursor, putative, expressed
Chr4	4971800	4971850	+	3'-UTR	0.029494	LOC_Os04g09350	expressed protein
Chr4	9094050	9094150	+	5'-UTR	0.0124368	LOC_Os04g16722	uncharacterized protein ycf68, putative, expressed
Chr4	9094200	9094600	+	5'-UTR	0.00564223	LOC_Os04g16722	uncharacterized protein ycf68, putative, expressed
Chr4	9094700	9094800	+	5'-UTR	0.000261544	LOC_Os04g16722	uncharacterized protein ycf68, putative, expressed
Chr4	9094900	9095000	+	5'-UTR	4.64316e-05	LOC_Os04g16722	uncharacterized protein ycf68, putative, expressed
Chr4	9095100	9095150	+	5'-UTR	1.277e-06	LOC_Os04g16722	uncharacterized protein ycf68, putative, expressed
Chr4	9095250	9095400	+	5'-UTR	0.00211963	LOC_Os04g16722	uncharacterized protein ycf68, putative, expressed
Chr4	9095450	9095500	+	5'-UTR	1.45916e-10	LOC_Os04g16722	uncharacterized protein ycf68, putative, expressed
Chr4	9095950	9096100	+	5'-UTR	0.000183485	LOC_Os04g16722	uncharacterized protein ycf68, putative, expressed
Chr4	9096150	9096300	+	CDS	0.00140104	LOC_Os04g16722	uncharacterized protein ycf68, putative, expressed
Chr4	9096650	9096750	+	3'-UTR	0.0195551	LOC_Os04g16722	uncharacterized protein ycf68, putative, expressed
Chr4	9096800	9096900	+	3'-UTR	0.00827983	LOC_Os04g16722	uncharacterized protein ycf68, putative, expressed
Chr4	9096950	9097000	+	3'-UTR	0.00173259	LOC_Os04g16722	uncharacterized protein ycf68, putative, expressed
Chr4	9097100	9097200	+	3'-UTR	0.0170889	LOC_Os04g16722	uncharacterized protein ycf68, putative, expressed
Chr4	9097250	9097450	+	3'-UTR	1.36873e-06	LOC_Os04g16722	uncharacterized protein ycf68, putative, expressed
Chr4	9097550	9097600	+	3'-UTR	2.73337e-13	LOC_Os04g16722	uncharacterized protein ycf68, putative, expressed
Chr4	9097950	9098050	+	3'-UTR	0.0145413	LOC_Os04g16722	uncharacterized protein ycf68, putative, expressed
Chr4	9098100	9098200	+	3'-UTR	0.00564591	LOC_Os04g16722	uncharacterized protein ycf68, putative, expressed
Chr4	9098250	9098450	+	3'-UTR	0.000348966	LOC_Os04g16722	uncharacterized protein ycf68, putative, expressed
Chr4	9107100	9107150	+	CDS	0.0201469	LOC_Os04g16734	maturase K, putative, expressed
Chr4	9107450	9107500	+	CDS	0.0188481	LOC_Os04g16734	maturase K, putative, expressed
Chr4	9107550	9107600	+	CDS	0.00573083	LOC_Os04g16734	maturase K, putative, expressed
Chr4	9122100	9122150	+	CDS	0.01034	LOC_Os04g16748	ATP synthase B chain, putative, expressed
Chr4	9122250	9122450	+	CDS	6.2182e-05	LOC_Os04g16748	ATP synthase B chain, putative, expressed
Chr4	9122550	9122650	+	Intron	0.000444925	LOC_Os04g16748	ATP synthase B chain, putative, expressed
Chr4	9122850	9122900	+	Intron	0.00129785	LOC_Os04g16748	ATP synthase B chain, putative, expressed
Chr4	9122950	9123000	+	Intron	0.0449987	LOC_Os04g16748	ATP synthase B chain, putative, expressed
Chr4	9123450	9123550	+	CDS	0.0013447	LOC_Os04g16748	ATP synthase B chain, putative, expressed
Chr4	9123600	9123700	+	CDS	8.75349e-05	LOC_Os04g16740	ATP synthase subunit alpha, putative, expressed
Chr4	9124250	9124300	+	CDS	0.0155007	LOC_Os04g16740	ATP synthase subunit alpha, putative, expressed
Chr4	9124350	9124400	+	CDS	0.00631034	LOC_Os04g16740	ATP synthase subunit alpha, putative, expressed
Chr4	9136100	9136200	+	5'-UTR	0.00182105	LOC_Os04g16770	photosynthetic reaction center protein, putative, expressed
Chr4	9136400	9136450	+	CDS	0.029494	LOC_Os04g16770	photosynthetic reaction center protein, putative, expressed
Chr4	9136800	9136850	+	CDS	1.11332e-06	LOC_Os04g16770	photosynthetic reaction center protein, putative, expressed
Chr4	9137000	9137150	+	CDS	0.0161442	LOC_Os04g16770	photosynthetic reaction center protein, putative, expressed
Chr4	9146750	9146800	+	CDS	0.00911274	LOC_Os04g16798	chloroplast 30S ribosomal protein S7, putative, expressed
Chr4	9146850	9146900	+	CDS	0.0331094	LOC_Os04g16798	chloroplast 30S ribosomal protein S7, putative, expressed
Chr4	9159350	9159400	+	CDS	0.029494	LOC_Os04g16838	chloroplast 30S ribosomal protein S11, putative, expressed
Chr4	9177950	9178000	+	CDS	0.01034	LOC_Os04g16874	photosystem II 44 kDa reaction center protein, putative, expressed
Chr4	9187100	9187150	+	CDS	0.00573083	LOC_Os04g16820	DNA-directed RNA polymerase subunit beta, putative, expressed
Chr4	9993700	9993800	+	Intron	0.0241711	LOC_Os04g18090	histone H1, putative, expressed
Chr4	9993950	9994000	+	CDS	0.00061949	LOC_Os04g18090	histone H1, putative, expressed
Chr4	12426650	12426700	+	CDS	0.00488416	LOC_Os04g21950	WRKY51, expressed
Chr4	18935000	18935050	+	CDS	0.029494	LOC_Os04g31620	#N/A
Chr4	19189100	19189200	+	5'-UTR	0.0204639	LOC_Os04g32030	heavy metal-associated domain containing protein, expressed
Chr4	19189300	19189350	+	CDS	3.09082e-05	LOC_Os04g32030	heavy metal-associated domain containing protein, expressed
Chr4	19271000	19271050	+	3'-UTR	0.0181398	LOC_Os04g32110	ACT domain containing protein, expressed
Chr4	22481750	22481800	+	CDS	0.0121869	LOC_Os04g37820	cytokinin-O-glucosyltransferase 2, putative, expressed
Chr4	22550350	22550400	+	5'-UTR	0.00154716	LOC_Os04g37920	FAD binding domain of DNA photolyase domain containing protein, expressed
Chr4	24117600	24117650	+	CDS	0.0158981	LOC_Os04g40630	BTBZ4 - Bric-a-Brac, Tramtrack, Broad Complex BTB domain with TAZ zinc finger and Calmodulin-binding domains, expressed
Chr4	24890700	24890750	+	CDS	0.00911274	LOC_Os04g42020	CCT/B-box zinc finger protein, putative, expressed
Chr4	26731500	26731550	+	Intron	0.029494	LOC_Os04g45240	expressed protein
Chr4	27200600	27200650	+	CDS	0.0331094	LOC_Os04g45930	RNA recognition motif containing protein, expressed
Chr4	27201250	27201350	+	CDS	0.0142959	LOC_Os04g45930	RNA recognition motif containing protein, expressed
Chr4	27201400	27201450	+	CDS	0.0121869	LOC_Os04g45930	RNA recognition motif containing protein, expressed
Chr4	27506650	27506700	+	CDS	0.0282466	LOC_Os04g46390	chaperone protein dnaJ, putative, expressed
Chr4	27509550	27509600	+	3'-UTR	0.00488416	LOC_Os04g46390	chaperone protein dnaJ, putative, expressed
Chr4	29110250	29110300	+	5'-UTR	0.0331094	LOC_Os04g48800	GDSL-like lipase/acylhydrolase, putative, expressed
Chr4	30546150	30546200	+	CDS	0.0188481	LOC_Os04g51560	WRKY68, expressed
Chr4	30845150	30845250	+	CDS	0.00841055	LOC_Os04g51960	expressed protein
Chr4	31996400	31996450	+	Intron	0.029494	LOC_Os04g53680	cyclin, putative, expressed
Chr4	33457900	33457950	+	5'-UTR	0.0331094	LOC_Os04g56160	plasma membrane ATPase, putative, expressed
Chr4	33460100	33460150	+	CDS	0.0188481	LOC_Os04g56160	plasma membrane ATPase, putative, expressed
Chr4	33461400	33461450	+	CDS	0.0188481	LOC_Os04g56160	plasma membrane ATPase, putative, expressed
Chr4	33763050	33763100	+	Intron	0.00701991	LOC_Os04g56620	molybdopterin biosynthesis protein CNX1, putative, expressed
Chr4	34081350	34081400	+	CDS	0.029494	LOC_Os04g57200	heavy metal transport/detoxification protein, putative, expressed
Chr4	34663900	34663950	+	CDS	0.0429748	LOC_Os04g58200	protochlorophyllide reductase A, chloroplast precursor, putative, expressed
Chr4	35427150	35427200	+	CDS	0.00573083	LOC_Os04g59570	expressed protein
Chr5	189750	189800	+	5'-UTR	0.01034	LOC_Os05g01280	expressed protein
Chr5	312850	312900	+	CDS	0.0181398	LOC_Os05g01530	expressed protein
Chr5	312950	313000	+	Intron	0.0188481	LOC_Os05g01530	expressed protein
Chr5	313150	313200	+	CDS	0.0158981	LOC_Os05g01530	expressed protein
Chr5	318800	318850	+	CDS	0.029494	LOC_Os05g01540	serine/arginine repetitive matrix protein 1, putative, expressed
Chr5	537950	538000	+	5'-UTR	0.00745309	LOC_Os05g01940	zinc finger, RING-type, putative, expressed
Chr5	801350	801450	+	5'-UTR	0.0254521	LOC_Os05g02420	expressed protein
Chr5	1662250	1662300	+	CDS	0.0334664	LOC_Os05g03760	zinc finger family protein, putative, expressed
Chr5	1662350	1662400	+	CDS	0.0137492	LOC_Os05g03760	zinc finger family protein, putative, expressed
Chr5	1718200	1718300	+	5'-UTR	0.000447618	LOC_Os05g03860	CPuORF3 - conserved peptide uORF-containing transcript, expressed
Chr5	2173050	2173100	+	CDS	0.0365497	LOC_Os05g04620	expressed protein
Chr5	3768050	3768100	+	CDS	0.000274948	LOC_Os05g07130	6PF-2-K/Fru-2,6-P2ASE liver isozyme, putative, expressed
Chr5	3771300	3771350	+	3'-UTR	0.00167292	LOC_Os05g07130	6PF-2-K/Fru-2,6-P2ASE liver isozyme, putative, expressed
Chr5	4303050	4303100	+	3'-UTR	0.00573083	LOC_Os05g07940	glyoxalase family protein, putative, expressed
Chr5	4786800	4786850	+	5'-UTR	0.0188481	LOC_Os05g08730	early fruit mRNA, putative, expressed
Chr5	4962550	4962600	+	Intron	0.0322474	LOC_Os05g08960	ubiquitin-conjugating enzyme, putative, expressed
Chr5	5119900	5119950	+	Intron	0.029494	LOC_Os05g09160	expressed protein
Chr5	5120350	5120400	+	Intron	0.029494	LOC_Os05g09160	expressed protein
Chr5	11891900	11891950	+	CDS	0.0188481	LOC_Os05g20304	expressed protein
Chr5	13737950	13738000	+	CDS	0.029494	LOC_Os05g23880	lipoxygenase, putative, expressed
Chr5	16151050	16151100	+	CDS	0.00125931	LOC_Os05g27730	WRKY53, expressed
Chr5	16151200	16151300	+	CDS	0.0199633	LOC_Os05g27730	WRKY53, expressed
Chr5	16152350	16152400	+	3'-UTR	0.0100418	LOC_Os05g27730	WRKY53, expressed
Chr5	16859750	16859850	+	5'-UTR	0.0151409	LOC_Os05g28740	universal stress protein domain containing protein, putative, expressed
Chr5	16860000	16860050	+	CDS	0.0260754	LOC_Os05g28740	universal stress protein domain containing protein, putative, expressed
Chr5	18434700	18434750	+	CDS	0.0181398	LOC_Os05g31680	expressed protein
Chr5	18790450	18790500	+	CDS	0.00573083	LOC_Os05g32220	L1P family of ribosomal proteins domain containing protein, expressed
Chr5	18793400	18793450	+	3'-UTR	0.029494	LOC_Os05g32220	L1P family of ribosomal proteins domain containing protein, expressed
Chr5	20130150	20130200	+	CDS	0.0188481	LOC_Os05g34070	DIP1, putative, expressed
Chr5	21526450	21526500	+	CDS	0.029494	LOC_Os05g36360	U-box domain containing protein, expressed
Chr5	21882950	21883000	+	CDS	0.0188481	LOC_Os05g37400	expressed protein
Chr5	24279150	24279200	+	CDS	0.0188481	LOC_Os05g41450	histone-like transcription factor and archaeal histone, putative, expressed
Chr5	24279300	24279350	+	CDS	0.029494	LOC_Os05g41450	histone-like transcription factor and archaeal histone, putative, expressed
Chr5	24309200	24309250	+	CDS	0.0188481	LOC_Os05g41510	SH2 motif, putative, expressed
Chr5	25011200	25011250	+	CDS	0.0188481	LOC_Os05g43060	retrotransposon, putative, centromere-specific, expressed
Chr5	25011950	25012050	+	CDS	0.00942526	LOC_Os05g43060	retrotransposon, putative, centromere-specific, expressed
Chr5	25182100	25182150	+	CDS	0.0188481	LOC_Os05g43280	MATH domain containing protein, expressed
Chr5	25642450	25642500	+	CDS	0.0188481	LOC_Os05g44100	trehalose synthase, putative, expressed
Chr5	26809600	26809650	+	3'-UTR	0.0158981	LOC_Os05g46220	mitochondrial carrier protein, putative, expressed
Chr5	27878750	27878800	+	5'-UTR	0.0241899	LOC_Os05g48630	expressed protein
Chr5	27878950	27879000	+	CDS	0.0067922	LOC_Os05g48630	expressed protein
Chr5	27879350	27879400	+	3'-UTR	0.0407379	LOC_Os05g48630	expressed protein
Chr5	28655700	28655750	+	CDS	0.00573083	LOC_Os05g49970	translation initiation factor IF-2, chloroplast precursor, putative, expressed
Chr6	525150	525200	+	Intron	0.00463417	LOC_Os06g01934	homeobox domain containing protein, expressed
Chr6	528300	528350	+	Intron	0.029494	LOC_Os06g01934	homeobox domain containing protein, expressed
Chr6	1784400	1784450	+	CDS	0.0188481	LOC_Os06g04230	expressed protein
Chr6	3761750	3761800	+	CDS	0.0188481	LOC_Os06g07760	sulfiredoxin-1, putative, expressed
Chr6	4269350	4269400	+	CDS	0.0158981	LOC_Os06g08580	transferase family protein, putative, expressed
Chr6	7230650	7230700	+	3'-UTR	0.0334401	LOC_Os06g13190	expressed protein
Chr6	10480500	10480550	+	CDS	0.0158981	LOC_Os06g18010	UDP-glucoronosyl and UDP-glucosyl transferase domain containing protein, expressed
Chr6	12453100	12453150	+	CDS	0.0249693	LOC_Os06g21590	chlorophyll A-B binding protein, putative, expressed
Chr6	12453250	12453300	+	CDS	0.0149624	LOC_Os06g21590	chlorophyll A-B binding protein, putative, expressed
Chr6	12453400	12453500	+	CDS	0.0363752	LOC_Os06g21590	chlorophyll A-B binding protein, putative, expressed
Chr6	12453650	12453700	+	3'-UTR	0.00140848	LOC_Os06g21590	chlorophyll A-B binding protein, putative, expressed
Chr6	13382300	13382350	+	Intron	0.00167292	LOC_Os06g22919	DEFL9 - Defensin and Defensin-like DEFL family, expressed
Chr6	13441250	13441300	+	CDS	0.0331094	LOC_Os06g23040	expressed protein
Chr6	13947050	13947100	+	5'-UTR	0.00488416	LOC_Os06g23870	acyl-CoA dehydrogenase domain protein, putative, expressed
Chr6	14078700	14078750	+	CDS	0.0334401	LOC_Os06g24070	myb-like DNA-binding domain containing protein, expressed
Chr6	14078800	14078850	+	CDS	0.0331094	LOC_Os06g24070	myb-like DNA-binding domain containing protein, expressed
Chr6	16702650	16702700	+	Intron	0.029494	LOC_Os06g29260	retrotransposon protein, putative, unclassified, expressed
Chr6	20170750	20170800	+	CDS	0.029494	LOC_Os06g34710	expressed protein
Chr6	23310400	23310450	+	CDS	0.0188481	LOC_Os06g39270	UDP-glucoronosyl and UDP-glucosyl transferase domain containing protein, expressed
Chr6	23575150	23575200	+	3'-UTR	0.00190915	LOC_Os06g39712	OsClp10 - Putative Clp protease homologue, expressed
Chr6	23737050	23737100	+	CDS	0.0188481	LOC_Os06g39912	expressed protein
Chr6	25158900	25158950	+	5'-UTR	0.00961623	LOC_Os06g41930	zinc-binding protein, putative, expressed
Chr6	26273050	26273100	+	CDS	0.00342474	LOC_Os06g43660	inorganic H+ pyrophosphatase, putative, expressed
Chr6	27230100	27230150	+	CDS	0.029494	LOC_Os06g45020	STRUBBELIG-RECEPTOR FAMILY 3 precursor, putative, expressed
Chr6	28180600	28180650	+	CDS	0.029494	LOC_Os06g46434	cytochrome c biogenesis protein ccsA, putative, expressed
Chr6	28695300	28695350	+	CDS	0.0158981	LOC_Os06g47340	glycosyltransferase family 43 protein, putative, expressed
Chr6	29342550	29342600	+	5'-UTR	0.0179389	LOC_Os06g48500	expressed protein
Chr6	29342700	29342750	+	CDS	0.0485651	LOC_Os06g48500	expressed protein
Chr6	29343050	29343100	+	CDS	0.029494	LOC_Os06g48500	expressed protein
Chr6	29968000	29968050	+	5'-UTR	0.0188481	LOC_Os06g49460	Rer1 protein, putative, expressed
Chr6	30417950	30418000	+	CDS	0.0173308	LOC_Os06g50230	expressed protein
Chr6	30993350	30993400	+	5'-UTR	0.0331094	LOC_Os06g51220	HMG1/2, putative, expressed
Chr6	30993500	30993550	+	5'-UTR	0.0100225	LOC_Os06g51220	HMG1/2, putative, expressed
Chr6	30994100	30994150	+	CDS	0.0188481	LOC_Os06g51220	HMG1/2, putative, expressed
Chr7	195100	195150	+	CDS	0.0188481	LOC_Os07g01310	glutamate receptor, putative, expressed
Chr7	2207400	2207450	+	CDS	0.0322474	LOC_Os07g05010	helix-loop-helix DNA-binding domain containing protein, expressed
Chr7	2454800	2454850	+	CDS	0.0407379	LOC_Os07g05360	photosystem II 10 kDa polypeptide, chloroplast precursor, putative, expressed
Chr7	2455200	2455250	+	CDS	0.0303757	LOC_Os07g05360	photosystem II 10 kDa polypeptide, chloroplast precursor, putative, expressed
Chr7	2546700	2546800	+	5'-UTR	0.0133422	LOC_Os07g05480	photosystem I reaction center subunit, chloroplast precursor, putative, expressed
Chr7	2799550	2799600	+	CDS	0.0188481	LOC_Os07g05820	hydroxyacid oxidase 1, putative, expressed
Chr7	2800300	2800350	+	CDS	0.0322474	LOC_Os07g05820	hydroxyacid oxidase 1, putative, expressed
Chr7	2987150	2987200	+	CDS	0.0188481	LOC_Os07g06130	ethylene-insensitive protein, putative, expressed
Chr7	3324250	3324300	+	5'-UTR	0.0188481	LOC_Os07g06820	serine/threonine-protein kinase RIO-like, putative, expressed
Chr7	3724600	3724650	+	CDS	0.029494	LOC_Os07g07480	HNH endonuclease domain-containing protein, putative, expressed
Chr7	3725900	3725950	+	Intron	0.0188481	LOC_Os07g07480	HNH endonuclease domain-containing protein, putative, expressed
Chr7	3760800	3760850	+	CDS	0.029494	LOC_Os07g07540	SHOOT1 protein, putative, expressed
Chr7	3761000	3761050	+	CDS	0.0334401	LOC_Os07g07540	SHOOT1 protein, putative, expressed
Chr7	4483600	4483650	+	CDS	0.0331094	LOC_Os07g08710	AT hook-containing DNA-binding protein, putative, expressed
Chr7	7717900	7717950	+	CDS	0.00167292	LOC_Os07g13460	expressed protein
Chr7	8139900	8139950	+	CDS	0.029494	LOC_Os07g14270	calreticulin precursor protein, putative, expressed
Chr7	12660600	12660650	+	CDS	0.0331094	LOC_Os07g22498	photosystem I iron-sulfur center, putative, expressed
Chr7	12661450	12661500	+	CDS	0.00488416	LOC_Os07g22504	NADPH-dependent oxidoreductase, putative, expressed
Chr7	12766400	12766450	+	3'-UTR	0.0188481	LOC_Os07g22650	expressed protein
Chr7	13122450	13122500	+	CDS	0.00745309	LOC_Os07g23280	transposon protein, putative, unclassified, expressed
Chr7	13443650	13443700	+	CDS	0.00573083	LOC_Os07g23810	expressed protein
Chr7	13591650	13591700	+	CDS	0.0121869	LOC_Os07g23990	tetratricopeptide repeat domain containing protein, putative, expressed
Chr7	14237200	14237350	+	CDS	0.0165001	LOC_Os07g25002	chloroplast 30S ribosomal protein S7, putative, expressed
Chr7	14533450	14533500	+	CDS	0.00147047	LOC_Os07g25430	photosystem I reaction center subunit IV A, chloroplast precursor, putative, expressed
Chr7	14916150	14916250	+	5'-UTR	0.0173731	LOC_Os07g26000	OsFBX235 - F-box domain containing protein, expressed
Chr7	20724650	20724700	+	CDS	0.0188481	LOC_Os07g34570	FAD dependent oxidoreductase domain containing protein, expressed
Chr7	20725350	20725400	+	CDS	0.0188481	LOC_Os07g34570	FAD dependent oxidoreductase domain containing protein, expressed
Chr7	20725650	20725700	+	3'-UTR	0.029494	LOC_Os07g34570	FAD dependent oxidoreductase domain containing protein, expressed
Chr7	21574950	21575000	+	CDS	0.010434	LOC_Os07g36080	oxygen evolving enhancer protein 3 domain containing protein, expressed
Chr7	21755200	21755250	+	CDS	0.029494	LOC_Os07g36390	PPR repeat containing protein, expressed
Chr7	22186100	22186150	+	CDS	0.0334401	LOC_Os07g37030	cytochrome b6-f complex iron-sulfur subunit, chloroplast precursor, putative, expressed
Chr7	22487450	22487500	+	5'-UTR	0.0485651	LOC_Os07g37550	chlorophyll A-B binding protein, putative, expressed
Chr7	22487750	22487950	+	CDS	0.0288421	LOC_Os07g37550	chlorophyll A-B binding protein, putative, expressed
Chr7	22488250	22488350	+	CDS	0.00647565	LOC_Os07g37550	chlorophyll A-B binding protein, putative, expressed
Chr7	23353700	23353750	+	CDS	0.00295731	LOC_Os07g38950	expressed protein
Chr7	23358400	23358450	+	CDS	0.00703623	LOC_Os07g38960	chlorophyll A-B binding protein, putative, expressed
Chr7	23358500	23358550	+	CDS	0.00246513	LOC_Os07g38960	chlorophyll A-B binding protein, putative, expressed
Chr7	23358650	23358700	+	CDS	0.00114383	LOC_Os07g38960	chlorophyll A-B binding protein, putative, expressed
Chr7	23359100	23359150	+	3'-UTR	0.0181398	LOC_Os07g38960	chlorophyll A-B binding protein, putative, expressed
Chr7	24985150	24985200	+	CDS	0.0176264	LOC_Os07g41694	acidic leucine-rich nuclear phosphoprotein 32-related protein 1, putative, expressed
Chr7	24985250	24985300	+	CDS	0.0100225	LOC_Os07g41694	acidic leucine-rich nuclear phosphoprotein 32-related protein 1, putative, expressed
Chr7	24985400	24985500	+	CDS	0.0249845	LOC_Os07g41694	acidic leucine-rich nuclear phosphoprotein 32-related protein 1, putative, expressed
Chr7	24985600	24985650	+	CDS	0.00961623	LOC_Os07g41694	acidic leucine-rich nuclear phosphoprotein 32-related protein 1, putative, expressed
Chr7	26211750	26211800	+	5'-UTR	0.029494	LOC_Os07g43810	RNA recognition motif containing protein, putative, expressed
Chr7	27082550	27082600	+	CDS	0.0188481	LOC_Os07g45400	expressed protein
Chr7	29215000	29215050	+	CDS	0.0188481	LOC_Os07g48820	transcription factor, putative, expressed
Chr7	29216100	29216150	+	CDS	0.00573083	LOC_Os07g48820	transcription factor, putative, expressed
Chr7	29616750	29616800	+	5'-UTR	0.0331094	LOC_Os07g49460	response regulator receiver domain containing protein, expressed
Chr8	577250	577300	+	CDS	0.0188481	LOC_Os08g01930	KH domain-containing protein, putative, expressed
Chr8	3372750	3372800	+	CDS	0.00573083	LOC_Os08g06110	MYB family transcription factor, putative, expressed
Chr8	4357700	4357750	+	CDS	0.0188481	LOC_Os08g07774	disease resistance protein RPM1, putative, expressed
Chr8	4588000	4588050	+	CDS	0.0188481	LOC_Os08g08080	BUD13, putative, expressed
Chr8	4686100	4686150	+	5'-UTR	0.00463417	LOC_Os08g08205	expressed protein
Chr8	5950300	5950350	+	3'-UTR	0.0188481	LOC_Os08g10244	retrotransposon protein, putative, unclassified, expressed
Chr8	5950450	5950500	+	3'-UTR	0.000472845	LOC_Os08g10244	retrotransposon protein, putative, unclassified, expressed
Chr8	6016050	6016100	+	CDS	0.0173308	LOC_Os08g10310	SHR5-receptor-like kinase, putative, expressed
Chr8	6022900	6022950	+	3'-UTR	0.0331094	LOC_Os08g10310	SHR5-receptor-like kinase, putative, expressed
Chr8	6032550	6032600	+	5'-UTR	0.029494	LOC_Os08g10320	SHR5-receptor-like kinase, putative, expressed
Chr8	6035500	6035550	+	CDS	0.00488416	LOC_Os08g10320	SHR5-receptor-like kinase, putative, expressed
Chr8	6736750	6736800	+	CDS	0.0188481	LOC_Os08g11480	expressed protein
Chr8	6737200	6737250	+	CDS	0.0188481	LOC_Os08g11480	expressed protein
Chr8	8969900	8969950	+	3'-UTR	0.0188481	LOC_Os08g14880	transposon protein, putative, unclassified, expressed
Chr8	8970000	8970050	+	3'-UTR	0.00573083	LOC_Os08g14880	transposon protein, putative, unclassified, expressed
Chr8	9256500	9256550	+	CDS	0.0062908	LOC_Os08g15248	NADPH-dependent oxidoreductase, putative, expressed
Chr8	9256700	9256750	+	Intron	0.0365497	LOC_Os08g15248	NADPH-dependent oxidoreductase, putative, expressed
Chr8	9257100	9257150	+	Intron	0.0266428	LOC_Os08g15248	NADPH-dependent oxidoreductase, putative, expressed
Chr8	9257250	9257300	+	CDS	0.0258228	LOC_Os08g15248	NADPH-dependent oxidoreductase, putative, expressed
Chr8	9276750	9276800	+	CDS	0.0188481	LOC_Os08g15306	chloroplast 50S ribosomal protein L20, putative, expressed
Chr8	17766250	17766300	+	CDS	0.00631034	LOC_Os08g29020	wall-associated kinase-like 2, putative, expressed
Chr8	17767750	17767800	+	3'-UTR	0.0331094	LOC_Os08g29020	wall-associated kinase-like 2, putative, expressed
Chr8	17768700	17768750	+	3'-UTR	0.0181398	LOC_Os08g29020	wall-associated kinase-like 2, putative, expressed
Chr8	17857000	17857050	+	3'-UTR	0.0322474	LOC_Os08g29160	5-AMP-activated protein kinase beta-1 subunit-related, putative, expressed
Chr8	18220450	18220500	+	CDS	0.0176264	LOC_Os08g29660	WRKY69, expressed
Chr8	18220550	18220600	+	CDS	3.50775e-05	LOC_Os08g29660	WRKY69, expressed
Chr8	20528750	20528800	+	CDS	0.0188481	LOC_Os08g33050	MYB family transcription factor, putative, expressed
Chr8	22190100	22190200	+	5'-UTR	0.0108145	LOC_Os08g35190	auxin-repressed protein, putative, expressed
Chr8	22324550	22324600	+	CDS	0.00321186	LOC_Os08g35420	photosynthetic reaction center protein, putative, expressed
Chr8	22325150	22325250	+	CDS	0.000125804	LOC_Os08g35420	photosynthetic reaction center protein, putative, expressed
Chr8	22325300	22325350	+	CDS	0.0485651	LOC_Os08g35420	photosynthetic reaction center protein, putative, expressed
Chr8	22325450	22325500	+	CDS	0.0407379	LOC_Os08g35420	photosynthetic reaction center protein, putative, expressed
Chr8	24884100	24884200	+	CDS	0.0141395	LOC_Os08g39370	citrate transporter, putative, expressed
Chr8	24954350	24954400	+	CDS	0.00167292	LOC_Os08g39450	AN1-like zinc finger domain containing protein, expressed
Chr8	25127200	25127300	+	Intron	0.0331412	LOC_Os08g39694	cytochrome P450, putative, expressed
Chr8	25127450	25127500	+	Intron	0.00819751	LOC_Os08g39694	cytochrome P450, putative, expressed
Chr8	25128750	25128800	+	Intron	0.0188481	LOC_Os08g39694	cytochrome P450, putative, expressed
Chr8	25464450	25464500	+	CDS	0.0188481	LOC_Os08g40250	expressed protein
Chr8	25982950	25983000	+	CDS	0.0188481	LOC_Os08g41110	chaperone protein dnaJ 10, putative, expressed
Chr8	26176450	26176500	+	5'-UTR	0.0188481	LOC_Os08g41460	expressed protein
Chr8	26178800	26178850	+	5'-UTR	0.00167292	LOC_Os08g41460	expressed protein
Chr8	26786000	26786050	+	5'-UTR	0.0334401	LOC_Os08g42420	expressed protein
Chr8	26994500	26994550	+	Intron	0.00573083	LOC_Os08g42700	resistance protein, putative, expressed
Chr8	27973050	27973100	+	5'-UTR	0.00488416	LOC_Os08g44480	40S ribosomal protein S25, putative, expressed
Chr8	27973150	27973200	+	CDS	0.0331094	LOC_Os08g44480	40S ribosomal protein S25, putative, expressed
Chr9	3050	3150	+	5'-UTR	0.0119374	LOC_Os09g00999	#N/A
Chr9	3400	3450	+	CDS	0.040439	LOC_Os09g00999	#N/A
Chr9	3650	3700	+	3'-UTR	0.000101884	LOC_Os09g00999	#N/A
Chr9	3850	3900	+	3'-UTR	7.75218e-05	LOC_Os09g00999	#N/A
Chr9	3950	4000	+	3'-UTR	0.0050322	LOC_Os09g00999	#N/A
Chr9	4050	4100	+	3'-UTR	0.000176149	LOC_Os09g00999	#N/A
Chr9	4200	4350	+	3'-UTR	2.82509e-05	LOC_Os09g00999	#N/A
Chr9	4550	4650	+	3'-UTR	0.00171474	LOC_Os09g00999	#N/A
Chr9	4750	4850	+	3'-UTR	0.00743564	LOC_Os09g00999	#N/A
Chr9	4950	5000	+	3'-UTR	5.06484e-13	LOC_Os09g00999	#N/A
Chr9	5050	5100	+	3'-UTR	0.00068227	LOC_Os09g00999	#N/A
Chr9	5300	5450	+	3'-UTR	0.00992507	LOC_Os09g00999	#N/A
Chr9	6300	6400	+	5'-UTR	2.04405e-05	LOC_Os09g01000	#N/A
Chr9	6650	6750	+	5'-UTR	5.40693e-05	LOC_Os09g01000	#N/A
Chr9	6900	6950	+	5'-UTR	0.00107337	LOC_Os09g01000	#N/A
Chr9	7000	7100	+	5'-UTR	1.88738e-15	LOC_Os09g01000	#N/A
Chr9	7150	7350	+	5'-UTR	0.0126605	LOC_Os09g01000	#N/A
Chr9	7450	7550	+	5'-UTR	8.10127e-06	LOC_Os09g01000	#N/A
Chr9	7700	7950	+	5'-UTR	0.00287955	LOC_Os09g01000	#N/A
Chr9	8000	8050	+	CDS	0.00189015	LOC_Os09g01000	#N/A
Chr9	8250	8300	+	3'-UTR	0	LOC_Os09g01000	#N/A
Chr9	8350	8500	+	3'-UTR	0.00137844	LOC_Os09g01000	#N/A
Chr9	8550	8850	+	3'-UTR	0.00527684	LOC_Os09g01000	#N/A
Chr9	8900	9050	+	3'-UTR	0.000780641	LOC_Os09g01000	#N/A
Chr9	9100	9150	+	3'-UTR	1.45407e-07	LOC_Os09g01000	#N/A
Chr9	9250	9350	+	3'-UTR	0.000478673	LOC_Os09g01000	#N/A
Chr9	3796150	3796200	+	3'-UTR	0.0121869	LOC_Os09g07570	ferredoxin-thioredoxin reductase catalytic chain, chloroplast precursor, putative, expressed
Chr9	4729650	4729700	+	CDS	0.0322474	LOC_Os09g08910	ATP synthase, putative, expressed
Chr9	4729900	4729950	+	3'-UTR	0.00342474	LOC_Os09g08910	ATP synthase, putative, expressed
Chr9	9097700	9097750	+	Intron	0.0188481	LOC_Os09g15050	ent-kaurene synthase A, chloroplast precursor, putative, expressed
Chr9	10845800	10845900	+	5'-UTR	0.00887954	LOC_Os09g17740	chlorophyll A-B binding protein, putative, expressed
Chr9	10845950	10846000	+	CDS	1.078e-07	LOC_Os09g17740	chlorophyll A-B binding protein, putative, expressed
Chr9	10846050	10846100	+	CDS	0.0149202	LOC_Os09g17740	chlorophyll A-B binding protein, putative, expressed
Chr9	10846300	10846400	+	CDS	0.000451335	LOC_Os09g17740	chlorophyll A-B binding protein, putative, expressed
Chr9	10846450	10846550	+	CDS	0.00240884	LOC_Os09g17740	chlorophyll A-B binding protein, putative, expressed
Chr9	10846650	10846700	+	3'-UTR	0.0407379	LOC_Os09g17740	chlorophyll A-B binding protein, putative, expressed
Chr9	12216400	12216450	+	5'-UTR	0.0218351	LOC_Os09g20350	ethylene-responsive transcription factor, putative, expressed
Chr9	12217400	12217450	+	CDS	0.029494	LOC_Os09g20350	ethylene-responsive transcription factor, putative, expressed
Chr9	12217550	12217600	+	CDS	0.0322474	LOC_Os09g20350	ethylene-responsive transcription factor, putative, expressed
Chr9	14534000	14534050	+	CDS	0.0188481	LOC_Os09g24440	expressed protein
Chr9	14534150	14534200	+	CDS	0.0188481	LOC_Os09g24440	expressed protein
Chr9	14918300	14918350	+	CDS	0.0188481	LOC_Os09g24970	expressed protein
Chr9	15444450	15444500	+	CDS	0.0121869	LOC_Os09g25760	tetraspanin family protein, putative, expressed
Chr9	15961950	15962050	+	CDS	0.016771	LOC_Os09g26420	AP2 domain containing protein, expressed
Chr9	15962150	15962200	+	CDS	0.00573083	LOC_Os09g26420	AP2 domain containing protein, expressed
Chr9	18470000	18470050	+	CDS	0.00631034	LOC_Os09g30340	photosystem I reaction center subunit, chloroplast precursor, putative, expressed
Chr9	22934450	22934500	+	5'-UTR	0.0331094	LOC_Os09g40000	AGAP005770-PA, putative, expressed
Chr1	168800	168850	-	3'-UTR	0.0188481	LOC_Os01g01340	light-induced protein 1-like, putative, expressed
Chr1	169150	169200	-	3'-UTR	0.00375418	LOC_Os01g01340	light-induced protein 1-like, putative, expressed
Chr1	169250	169300	-	3'-UTR	0.000302802	LOC_Os01g01340	light-induced protein 1-like, putative, expressed
Chr1	169550	169700	-	3'-UTR	0.00145442	LOC_Os01g01340	light-induced protein 1-like, putative, expressed
Chr1	169750	169800	-	CDS	0.0258228	LOC_Os01g01340	light-induced protein 1-like, putative, expressed
Chr1	169850	169900	-	CDS	0.00463417	LOC_Os01g01340	light-induced protein 1-like, putative, expressed
Chr1	2987500	2987550	-	CDS	0.0188481	LOC_Os01g06290	splicing factor, arginine/serine-rich, putative, expressed
Chr1	4330100	4330150	-	3'-UTR	0.00463417	LOC_Os01g08700	GIGANTEA, putative, expressed
Chr1	4331900	4331950	-	CDS	0.000730906	LOC_Os01g08700	GIGANTEA, putative, expressed
Chr1	4333200	4333250	-	CDS	0.034035	LOC_Os01g08700	GIGANTEA, putative, expressed
Chr1	4333750	4333800	-	CDS	0.0477713	LOC_Os01g08700	GIGANTEA, putative, expressed
Chr1	4336150	4336200	-	CDS	0.0454345	LOC_Os01g08700	GIGANTEA, putative, expressed
Chr1	4336250	4336300	-	CDS	0.029494	LOC_Os01g08700	GIGANTEA, putative, expressed
Chr1	4336350	4336400	-	CDS	0.00438702	LOC_Os01g08700	GIGANTEA, putative, expressed
Chr1	4336500	4336550	-	5'-UTR	0.014221	LOC_Os01g08700	GIGANTEA, putative, expressed
Chr1	4949550	4949600	-	3'-UTR	0.029494	LOC_Os01g09620	zinc finger/CCCH transcription factor, putative, expressed
Chr1	12924300	12924400	-	3'-UTR	0.0135373	LOC_Os01g22990	acidic leucine-rich nuclear phosphoprotein 32-related protein 1, putative, expressed
Chr1	13261950	13262000	-	5'-UTR	0.00167292	LOC_Os01g23590	suppressor of Mek, putative, expressed
Chr1	14573850	14573900	-	CDS	0.00573083	LOC_Os01g25710	transposon protein, putative, CACTA, En/Spm sub-class, expressed
Chr1	14574750	14574800	-	CDS	0.000274948	LOC_Os01g25710	transposon protein, putative, CACTA, En/Spm sub-class, expressed
Chr1	17274100	17274150	-	CDS	0.0188481	LOC_Os01g31580	BZIP protein, putative, expressed
Chr1	17427450	17427500	-	Intron	0.029494	LOC_Os01g31810	RNA recognition motif containing protein, putative, expressed
Chr1	18685000	18685100	-	Intron	0.00760537	LOC_Os01g33960	transposon protein, putative, CACTA, En/Spm sub-class, expressed
Chr1	20601500	20601550	-	CDS	0.0121869	LOC_Os01g36950	N-rich protein, putative, expressed
Chr1	20601600	20601900	-	CDS	0.0105813	LOC_Os01g36950	N-rich protein, putative, expressed
Chr1	20602000	20602050	-	CDS	0.0158981	LOC_Os01g36950	N-rich protein, putative, expressed
Chr1	22958350	22958400	-	5'-UTR	0.0188481	LOC_Os01g40630	uncharacterized protein PA4923, putative, expressed
Chr1	23741600	23741650	-	CDS	0.00573083	LOC_Os01g41880	hyaluronan/mRNA binding family domain containing protein, expressed
Chr1	23743350	23743400	-	CDS	0.0331094	LOC_Os01g41880	hyaluronan/mRNA binding family domain containing protein, expressed
Chr1	27681200	27681250	-	CDS	0.0188481	LOC_Os01g48300	ATP synthase protein I related, putative, expressed
Chr1	28086250	28086300	-	CDS	0.029494	LOC_Os01g48940	expressed protein
Chr1	28381750	28381800	-	5'-UTR	0.0477713	LOC_Os01g49370	expressed protein
Chr1	29202650	29202700	-	CDS	0.0407379	LOC_Os01g50840	expressed protein
Chr1	29485350	29485400	-	CDS	0.0331094	LOC_Os01g51290	protein kinase family protein, putative, expressed
Chr1	29969100	29969150	-	5'-UTR	0.0188481	LOC_Os01g52110	RING finger and CHY zinc finger domain-containing protein 1, putative, expressed
Chr1	30031350	30031450	-	3'-UTR	0.020175	LOC_Os01g52250	starch synthase, putative, expressed
Chr1	30031550	30031650	-	3'-UTR	0.0203689	LOC_Os01g52250	starch synthase, putative, expressed
Chr1	30517350	30517400	-	Intron	0.0188481	LOC_Os01g53090	pathogen-related protein, putative, expressed
Chr1	30885950	30886000	-	CDS	0.0322474	LOC_Os01g53730	expressed protein
Chr1	31560700	31560750	-	5'-UTR	0.029494	LOC_Os01g54870	60S ribosomal protein L18a, putative, expressed
Chr1	31739450	31739500	-	CDS	0.00573083	LOC_Os01g55170	la domain containing protein, expressed
Chr1	32180000	32180050	-	CDS	0.00167292	LOC_Os01g55880	hemimethylated DNA binding domain containing protein, expressed
Chr1	32709100	32709150	-	5'-UTR	0.00868157	LOC_Os01g56680	photosystem II reaction center W protein, chloroplast precursor, putative, expressed
Chr1	33523550	33523650	-	CDS	0.0139377	LOC_Os01g57962	photosystem I P700 chlorophyll a apoprotein A2, putative, expressed
Chr1	33523750	33523850	-	CDS	0.00525732	LOC_Os01g57962	photosystem I P700 chlorophyll a apoprotein A2, putative, expressed
Chr1	33525750	33525800	-	CDS	0.029494	LOC_Os01g57964	photosystem I P700 chlorophyll a apoprotein A1, putative, expressed
Chr1	33526000	33526050	-	CDS	0.0188481	LOC_Os01g57964	photosystem I P700 chlorophyll a apoprotein A1, putative, expressed
Chr1	33526550	33526600	-	CDS	0.0454345	LOC_Os01g57964	photosystem I P700 chlorophyll a apoprotein A1, putative, expressed
Chr1	33526650	33526700	-	CDS	0.00819751	LOC_Os01g57964	photosystem I P700 chlorophyll a apoprotein A1, putative, expressed
Chr1	33527650	33527700	-	CDS	0.0381759	LOC_Os01g57966	photosystem I assembly protein ycf3, putative, expressed
Chr1	33528200	33528250	-	Intron	0.00167292	LOC_Os01g57966	photosystem I assembly protein ycf3, putative, expressed
Chr1	33528300	33528400	-	Intron	0.00063194	LOC_Os01g57966	photosystem I assembly protein ycf3, putative, expressed
Chr1	33529000	33529150	-	Intron	8.87359e-06	LOC_Os01g57966	photosystem I assembly protein ycf3, putative, expressed
Chr1	33529250	33529350	-	Intron	0.00041455	LOC_Os01g57966	photosystem I assembly protein ycf3, putative, expressed
Chr1	33540050	33540100	-	CDS	0.00167292	LOC_Os01g58000	ATP synthase epsilon chain, putative, expressed
Chr1	34139250	34139300	-	CDS	0.0188481	LOC_Os01g59080	expressed protein
Chr1	34139450	34139500	-	CDS	0.0188481	LOC_Os01g59080	expressed protein
Chr1	36387950	36388000	-	CDS	0.029494	LOC_Os01g62820	Transcription initiation factor TFIID subunit A containing protein, expressed
Chr1	36943550	36943600	-	CDS	0.00167292	LOC_Os01g63690	hs1, putative, expressed
Chr1	37070900	37070950	-	CDS	0.0188481	LOC_Os01g63890	G10 protein, putative, expressed
Chr1	38399500	38399650	-	3'-UTR	0.011174	LOC_Os01g66120	No apical meristem protein, putative, expressed
Chr1	38400800	38400850	-	CDS	0.0358106	LOC_Os01g66120	No apical meristem protein, putative, expressed
Chr1	39692400	39692450	-	CDS	0.00631034	LOC_Os01g68320	DEAD-box ATP-dependent RNA helicase 30, putative, expressed
Chr1	39920000	39920050	-	CDS	0.0158981	LOC_Os01g68720	keratin, type I cytoskeletal 9, putative, expressed
Chr1	40487600	40487650	-	CDS	0.00573083	LOC_Os01g69990	GYF domain containing protein, putative, expressed
Chr1	40487800	40487850	-	CDS	0.0121869	LOC_Os01g69990	GYF domain containing protein, putative, expressed
Chr1	40488100	40488150	-	CDS	0.000130192	LOC_Os01g69990	GYF domain containing protein, putative, expressed
Chr1	40488650	40488750	-	CDS	0.00942769	LOC_Os01g69990	GYF domain containing protein, putative, expressed
Chr1	40489000	40489050	-	CDS	0.00167292	LOC_Os01g69990	GYF domain containing protein, putative, expressed
Chr1	40489350	40489450	-	CDS	0.0259788	LOC_Os01g69990	GYF domain containing protein, putative, expressed
Chr1	40489600	40489650	-	CDS	0.0158981	LOC_Os01g69990	GYF domain containing protein, putative, expressed
Chr1	41493750	41493800	-	5'-UTR	0.0188481	LOC_Os01g71620	expressed protein
Chr1	41977550	41977600	-	CDS	0.0260754	LOC_Os01g72370	helix-loop-helix DNA-binding domain containing protein, expressed
Chr1	42826750	42826800	-	3'-UTR	0.0188481	LOC_Os01g73910	peptidase, putative, expressed
Chr1	42839000	42839050	-	Intron	0.0188481	LOC_Os01g73950	PPR repeat containing protein, expressed
Chr1	43074600	43074650	-	CDS	0.0188481	LOC_Os01g74350	soluble inorganic pyrophosphatase, putative, expressed
Chr1	43237650	43237700	-	CDS	0.0331094	LOC_Os01g74650	cysteine synthase, mitochondrial precursor, putative, expressed
Chr10	56150	56200	-	Intron	0.0105112	LOC_Os10g01044	isoflavone reductase, putative, expressed
Chr10	116100	116150	-	5'-UTR	0.029494	LOC_Os10g01134	OsSCP46 - Putative Serine Carboxypeptidase homologue, expressed
Chr10	656400	656450	-	CDS	0.000730906	LOC_Os10g02040	peroxidase precursor, putative, expressed
Chr10	1008450	1008500	-	CDS	0.00167292	LOC_Os10g02630	transposon protein, putative, CACTA, En/Spm sub-class, expressed
Chr10	1008700	1008800	-	CDS	0.029494	LOC_Os10g02630	transposon protein, putative, CACTA, En/Spm sub-class, expressed
Chr10	1009150	1009200	-	CDS	0.029494	LOC_Os10g02630	transposon protein, putative, CACTA, En/Spm sub-class, expressed
Chr10	1011450	1011500	-	CDS	0.0179389	LOC_Os10g02630	transposon protein, putative, CACTA, En/Spm sub-class, expressed
Chr10	1012250	1012300	-	CDS	0.0365497	LOC_Os10g02630	transposon protein, putative, CACTA, En/Spm sub-class, expressed
Chr10	3118300	3118350	-	CDS	0.029494	LOC_Os10g06130	RNA recognition motif containing protein, expressed
Chr10	5584550	5584600	-	CDS	0.0188481	LOC_Os10g10170	PPR repeat domain containing protein, putative, expressed
Chr10	6927050	6927100	-	CDS	0.0188481	LOC_Os10g12450	expressed protein
Chr10	7685400	7685450	-	CDS	0.00573083	LOC_Os10g14170	expressed protein
Chr10	10322300	10322400	-	5'-UTR	0.0143137	LOC_Os10g20480	#N/A
Chr10	10322450	10322550	-	5'-UTR	0.0302605	LOC_Os10g20480	#N/A
Chr10	10807600	10807650	-	CDS	1.69532e-05	LOC_Os10g21192	photosystem Q, putative, expressed
Chr10	10808200	10808350	-	CDS	0.00396595	LOC_Os10g21192	photosystem Q, putative, expressed
Chr10	10810400	10810450	-	CDS	0.0188481	LOC_Os10g21194	maturase K, putative, expressed
Chr10	10812150	10812350	-	Intron	0.00813817	LOC_Os10g21196	chloroplast 30S ribosomal protein S16, putative, expressed
Chr10	10812400	10812450	-	Intron	0.0056119	LOC_Os10g21196	chloroplast 30S ribosomal protein S16, putative, expressed
Chr10	10812700	10812750	-	CDS	0.0101775	LOC_Os10g21196	chloroplast 30S ribosomal protein S16, putative, expressed
Chr10	10843900	10843950	-	CDS	0.0158981	LOC_Os10g21248	photosystem I P700 chlorophyll a apoprotein A2, putative, expressed
Chr10	10844050	10844100	-	CDS	1.57782e-07	LOC_Os10g21248	photosystem I P700 chlorophyll a apoprotein A2, putative, expressed
Chr10	10844950	10845000	-	CDS	0.0499115	LOC_Os10g21248	photosystem I P700 chlorophyll a apoprotein A2, putative, expressed
Chr10	10847950	10848050	-	CDS	0.0199244	LOC_Os10g21250	photosystem I P700 chlorophyll a apoprotein A1, putative, expressed
Chr10	10848300	10848350	-	CDS	0.0375361	LOC_Os10g21250	photosystem I P700 chlorophyll a apoprotein A1, putative, expressed
Chr10	10849000	10849050	-	CDS	0.00342474	LOC_Os10g21254	photosystem I assembly protein ycf3, putative, expressed
Chr10	10849550	10849600	-	Intron	0.00167292	LOC_Os10g21254	photosystem I assembly protein ycf3, putative, expressed
Chr10	10849650	10849850	-	Intron	0.021816	LOC_Os10g21254	photosystem I assembly protein ycf3, putative, expressed
Chr10	10849950	10850000	-	CDS	0.00573083	LOC_Os10g21254	photosystem I assembly protein ycf3, putative, expressed
Chr10	10850050	10850100	-	CDS	0.0121869	LOC_Os10g21254	photosystem I assembly protein ycf3, putative, expressed
Chr10	10850350	10850550	-	Intron	0.00686029	LOC_Os10g21254	photosystem I assembly protein ycf3, putative, expressed
Chr10	10850600	10850700	-	Intron	9.79862e-05	LOC_Os10g21254	photosystem I assembly protein ycf3, putative, expressed
Chr10	10855150	10855200	-	CDS	0.0188481	LOC_Os10g21258	NADPH-dependent oxidoreductase, putative, expressed
Chr10	10855550	10855600	-	CDS	0.00573083	LOC_Os10g21258	NADPH-dependent oxidoreductase, putative, expressed
Chr10	10859750	10859800	-	CDS	0.0145973	LOC_Os10g21266	ATP synthase subunit beta, putative, expressed
Chr10	10882500	10882550	-	CDS	0.0331094	LOC_Os10g21332	chloroplast 30S ribosomal protein S11, putative, expressed
Chr10	11203000	11203050	-	CDS	0.0158981	LOC_Os10g21810	histidine kinase, putative, expressed
Chr10	13258900	13258950	-	Intron	0.00573083	LOC_Os10g25570	expressed protein
Chr10	14171750	14171800	-	CDS	0.0477713	LOC_Os10g26940	BURP domain containing protein, expressed
Chr10	14172100	14172150	-	CDS	0.0179259	LOC_Os10g26940	BURP domain containing protein, expressed
Chr10	14172600	14172750	-	CDS	0.0295166	LOC_Os10g26940	BURP domain containing protein, expressed
Chr10	14910050	14910100	-	CDS	0.00573083	LOC_Os10g28610	KIP1, putative, expressed
Chr10	18692050	18692100	-	CDS	0.029494	LOC_Os10g35030	IAP100, putative, expressed
Chr10	19161900	19161950	-	CDS	0.0331094	LOC_Os10g35840	shikimate/quinate 5-dehydrogenase, putative, expressed
Chr10	20480100	20480200	-	Intron	0.0165027	LOC_Os10g38272	ATP synthase B chain, putative, expressed
Chr10	20480600	20480850	-	Intron	0.00669091	LOC_Os10g38272	ATP synthase B chain, putative, expressed
Chr10	20480900	20480950	-	CDS	0.0060183	LOC_Os10g38272	ATP synthase B chain, putative, expressed
Chr10	20483250	20483300	-	CDS	0.029494	LOC_Os10g38276	chloroplast ATP synthase a chain precursor, putative, expressed
Chr10	20805550	20805600	-	CDS	0.00573083	LOC_Os10g39030	homeobox domain containing protein, expressed
Chr10	21866750	21866800	-	CDS	0.0121869	LOC_Os10g40740	helix-loop-helix DNA-binding domain containing protein, expressed
Chr10	22030500	22030550	-	CDS	0.0188481	LOC_Os10g41030	agenet domain containing protein, putative, expressed
Chr10	23037050	23037100	-	3'-UTR	0.0188481	LOC_Os10g42710	RCD1, putative, expressed
Chr10	23037350	23037400	-	3'-UTR	0.0303757	LOC_Os10g42710	RCD1, putative, expressed
Chr10	23037550	23037600	-	CDS	0.0331094	LOC_Os10g42710	RCD1, putative, expressed
Chr10	23037900	23037950	-	CDS	0.0121869	LOC_Os10g42710	RCD1, putative, expressed
Chr11	260400	260450	-	CDS	0.0188481	LOC_Os11g01439	chloroplast unusual positioning protein, putative, expressed
Chr11	261700	261750	-	5'-UTR	0.0407379	LOC_Os11g01439	chloroplast unusual positioning protein, putative, expressed
Chr11	823850	823900	-	CDS	0.0334401	LOC_Os11g02610	BTBN20 - Bric-a-Brac, Tramtrack, Broad Complex BTB domain with non-phototropic hypocotyl 3 NPH3 and coiled-coil domains, expressed
Chr11	827700	827750	-	CDS	0.0188481	LOC_Os11g02620	BTBN21 - Bric-a-Brac, Tramtrack, Broad Complex BTB domain with non-phototropic hypocotyl 3 NPH3 and coiled-coil domains, expressed
Chr11	1391150	1391200	-	CDS	0.0331094	LOC_Os11g03580	expressed protein
Chr11	2839350	2839400	-	CDS	0.0121869	LOC_Os11g06020	homeobox domain containing protein, expressed
Chr11	3489200	3489250	-	3'-UTR	0.0100418	LOC_Os11g07020	fructose-bisphospate aldolase isozyme, putative, expressed
Chr11	3489600	3489700	-	3'-UTR	0.0260715	LOC_Os11g07020	fructose-bisphospate aldolase isozyme, putative, expressed
Chr11	3489950	3490000	-	5'-UTR	0.0261259	LOC_Os11g07020	fructose-bisphospate aldolase isozyme, putative, expressed
Chr11	3490050	3490100	-	5'-UTR	0.0064213	LOC_Os11g07020	fructose-bisphospate aldolase isozyme, putative, expressed
Chr11	4129350	4129400	-	CDS	0.0188481	LOC_Os11g07960	transferase family protein, putative, expressed
Chr11	4737400	4737450	-	CDS	0.0188481	LOC_Os11g08950	protein kinase family protein, putative, expressed
Chr11	5259250	5259300	-	CDS	0.0181398	LOC_Os11g09830	expressed protein
Chr11	5662200	5662250	-	CDS	0.0158981	LOC_Os11g10420	phosphatidylinositol kinase, putative, expressed
Chr11	7257300	7257350	-	CDS	0.00167292	LOC_Os11g12810	sucrose-phosphate synthase, putative, expressed
Chr11	7878250	7878300	-	3'-UTR	0.0100225	LOC_Os11g14140	OsFBK25 - F-box domain and kelch repeat containing protein, expressed
Chr11	8169700	8169750	-	5'-UTR	0.0381759	LOC_Os11g14544	expressed protein
Chr11	11755550	11755600	-	Intron	0.0121869	LOC_Os11g20330	expressed protein
Chr11	21994000	21994050	-	5'-UTR	0.0188481	LOC_Os11g37230	zinc finger, C3HC4 type domain containing protein, expressed
Chr11	27116850	27116900	-	3'-UTR	0.00493032	LOC_Os11g44810	auxin-repressed protein, putative, expressed
Chr11	27117100	27117250	-	3'-UTR	0.0081671	LOC_Os11g44810	auxin-repressed protein, putative, expressed
Chr11	28934350	28934500	-	CDS	0.00403183	LOC_Os11g47970	AAA-type ATPase family protein, putative, expressed
Chr11	28934700	28934950	-	CDS	0.00278274	LOC_Os11g47970	AAA-type ATPase family protein, putative, expressed
Chr11	28935350	28935400	-	CDS	0.0462632	LOC_Os11g47970	AAA-type ATPase family protein, putative, expressed
Chr11	28935500	28935800	-	CDS	0.0187023	LOC_Os11g47970	AAA-type ATPase family protein, putative, expressed
Chr11	28935900	28935950	-	Intron	0.00393275	LOC_Os11g47970	AAA-type ATPase family protein, putative, expressed
Chr12	281050	281100	-	CDS	0.0303757	LOC_Os12g01449	chloroplast unusual positioning protein, putative, expressed
Chr12	281500	281550	-	CDS	0.0158981	LOC_Os12g01449	chloroplast unusual positioning protein, putative, expressed
Chr12	281600	281650	-	CDS	0.0176264	LOC_Os12g01449	chloroplast unusual positioning protein, putative, expressed
Chr12	281750	281800	-	CDS	0.00548247	LOC_Os12g01449	chloroplast unusual positioning protein, putative, expressed
Chr12	861500	861550	-	CDS	0.0452922	LOC_Os12g02530	BTBN22 - Bric-a-Brac, Tramtrack, Broad Complex BTB domain with non-phototropic hypocotyl 3 NPH3 and coiled-coil domains, expressed
Chr12	864800	864900	-	3'-UTR	0.00824997	LOC_Os12g02540	BTBN23 - Bric-a-Brac, Tramtrack, Broad Complex BTB domain with non-phototropic hypocotyl 3 NPH3 and coiled-coil domains, expressed
Chr12	1774400	1774450	-	5'-UTR	0.0121869	LOC_Os12g04204	expressed protein
Chr12	4462100	4462150	-	CDS	0.0435569	LOC_Os12g08730	thioredoxin, putative, expressed
Chr12	4462350	4462400	-	CDS	0.000755308	LOC_Os12g08730	thioredoxin, putative, expressed
Chr12	4462550	4462600	-	CDS	0.0303757	LOC_Os12g08730	thioredoxin, putative, expressed
Chr12	6799650	6799700	-	3'-UTR	0.0121869	LOC_Os12g12360	transposon protein, putative, Mutator sub-class, expressed
Chr12	6800150	6800200	-	CDS	0.0454345	LOC_Os12g12360	transposon protein, putative, Mutator sub-class, expressed
Chr12	7097150	7097200	-	CDS	0.0188481	LOC_Os12g12850	ATP-dependent Clp protease ATP-binding subunit clpA homolog,chloroplast precursor, putative, expressed
Chr12	7097600	7097650	-	CDS	0.029494	LOC_Os12g12850	ATP-dependent Clp protease ATP-binding subunit clpA homolog,chloroplast precursor, putative, expressed
Chr12	7441500	7441550	-	3'-UTR	0.0331094	LOC_Os12g13340	expressed protein
Chr12	7442800	7442850	-	CDS	0.00488416	LOC_Os12g13340	expressed protein
Chr12	8540600	8540700	-	3'-UTR	0.0331094	LOC_Os12g14930	ATP synthase protein MI25, putative, expressed
Chr12	8541250	8541400	-	5'-UTR	0.000545555	LOC_Os12g14930	ATP synthase protein MI25, putative, expressed
Chr12	8679200	8679250	-	5'-UTR	0.0158981	LOC_Os12g15222	expressed protein
Chr12	10080600	10080650	-	3'-UTR	0.0322474	LOC_Os12g17600	ribulose bisphosphate carboxylase small chain, chloroplast precursor, putative, expressed
Chr12	10081050	10081100	-	CDS	0.0145973	LOC_Os12g17600	ribulose bisphosphate carboxylase small chain, chloroplast precursor, putative, expressed
Chr12	10081200	10081300	-	CDS	0.0282529	LOC_Os12g17600	ribulose bisphosphate carboxylase small chain, chloroplast precursor, putative, expressed
Chr12	11288950	11289000	-	CDS	0.0188481	LOC_Os12g19430	ATP synthase epsilon chain, putative, expressed
Chr12	13371550	13371600	-	Intron	0.011806	LOC_Os12g23590	#N/A
Chr12	13404300	13404350	-	CDS	0.0121869	LOC_Os12g23610	ATP synthase, A subunit family protein, putative, expressed
Chr12	13405800	13405850	-	Intron	0.0144117	LOC_Os12g23610	ATP synthase, A subunit family protein, putative, expressed
Chr12	17694300	17694350	-	CDS	0.0334401	LOC_Os12g29660	DEAD-box ATP-dependent RNA helicase, putative, expressed
Chr12	20460700	20460750	-	CDS	0.0181398	LOC_Os12g33928	expressed protein
Chr12	20660500	20660550	-	5'-UTR	2.28475e-07	LOC_Os12g34108	ATP synthase protein 9, mitochondrial, putative, expressed
Chr12	22176700	22176750	-	CDS	0.0188481	LOC_Os12g36180	auxilin, putative, expressed
Chr12	22176900	22176950	-	CDS	0.0331094	LOC_Os12g36180	auxilin, putative, expressed
Chr12	23736350	23736400	-	CDS	0.0181398	LOC_Os12g38640	expressed protein
Chr12	23736450	23736500	-	CDS	0.029494	LOC_Os12g38640	expressed protein
Chr12	25282750	25282800	-	3'-UTR	0.0331094	LOC_Os12g40840	expressed protein
Chr12	26364550	26364600	-	CDS	0.0331094	LOC_Os12g42420	DNA binding protein, putative, expressed
Chr12	27482850	27482900	-	CDS	0.0188481	LOC_Os12g44330	serine/threonine-protein kinase PRP4, putative, expressed
Chr12	27484750	27484850	-	CDS	0.0257686	LOC_Os12g44330	serine/threonine-protein kinase PRP4, putative, expressed
Chr12	27484900	27484950	-	CDS	0.00461708	LOC_Os12g44330	serine/threonine-protein kinase PRP4, putative, expressed
Chr12	27485100	27485150	-	CDS	0.0407379	LOC_Os12g44330	serine/threonine-protein kinase PRP4, putative, expressed
Chr12	27485250	27485300	-	CDS	0.00573083	LOC_Os12g44330	serine/threonine-protein kinase PRP4, putative, expressed
Chr12	27485450	27485500	-	CDS	0.0331094	LOC_Os12g44330	serine/threonine-protein kinase PRP4, putative, expressed
Chr12	27485700	27485750	-	CDS	0.0176264	LOC_Os12g44330	serine/threonine-protein kinase PRP4, putative, expressed
Chr2	79850	79900	-	3'-UTR	0.00548247	LOC_Os02g01150	erythronate-4-phosphate dehydrogenase domain containing protein, expressed
Chr2	80500	80550	-	CDS	0.0188481	LOC_Os02g01150	erythronate-4-phosphate dehydrogenase domain containing protein, expressed
Chr2	825200	825250	-	3'-UTR	0.0188481	LOC_Os02g02400	catalase isozyme A, putative, expressed
Chr2	825350	825400	-	3'-UTR	0.0239714	LOC_Os02g02400	catalase isozyme A, putative, expressed
Chr2	825750	826000	-	3'-UTR	0.018563	LOC_Os02g02400	catalase isozyme A, putative, expressed
Chr2	826200	826250	-	3'-UTR	0.015065	LOC_Os02g02400	catalase isozyme A, putative, expressed
Chr2	826450	826500	-	CDS	0.0173475	LOC_Os02g02400	catalase isozyme A, putative, expressed
Chr2	826650	826700	-	CDS	0.0322474	LOC_Os02g02400	catalase isozyme A, putative, expressed
Chr2	1696000	1696050	-	CDS	0.0334401	LOC_Os02g03960	CPuORF1 - conserved peptide uORF-containing transcript, expressed
Chr2	1761200	1761250	-	CDS	0.00573083	LOC_Os02g04050	chromosome segregation protein, putative, expressed
Chr2	1973250	1973300	-	CDS	0.0121869	LOC_Os02g04460	ribosomal protein L3, putative, expressed
Chr2	2321800	2321850	-	CDS	0.0188481	LOC_Os02g04950	splicing factor 3B subunit 1, putative, expressed
Chr2	3233800	3233850	-	5'-UTR	0.00297686	LOC_Os02g06480	SCO1 protein homolog, mitochondrial precursor, putative, expressed
Chr2	4699300	4699350	-	CDS	0.0188481	LOC_Os02g09150	inorganic H+ pyrophosphatase, putative, expressed
Chr2	5468950	5469000	-	CDS	0.0179389	LOC_Os02g10390	chlorophyll A-B binding protein, putative, expressed
Chr2	5469050	5469100	-	CDS	5.34359e-05	LOC_Os02g10390	chlorophyll A-B binding protein, putative, expressed
Chr2	5630150	5630200	-	CDS	0.0331094	LOC_Os02g10700	OsFBL7 - F-box domain and LRR containing protein, expressed
Chr2	6509200	6509250	-	3'-UTR	0.000472845	LOC_Os02g12480	expressed protein
Chr2	6509850	6509900	-	3'-UTR	0.000730906	LOC_Os02g12480	expressed protein
Chr2	6511550	6511600	-	3'-UTR	0.00167292	LOC_Os02g12480	expressed protein
Chr2	6513650	6513700	-	5'-UTR	0.00389383	LOC_Os02g12480	expressed protein
Chr2	14285600	14285650	-	CDS	0.0188481	LOC_Os02g24632	photosystem II 44 kDa reaction center protein, putative, expressed
Chr2	14285900	14286000	-	CDS	0.000502176	LOC_Os02g24632	photosystem II 44 kDa reaction center protein, putative, expressed
Chr2	14286500	14286550	-	CDS	0.0435569	LOC_Os02g24632	photosystem II 44 kDa reaction center protein, putative, expressed
Chr2	14289350	14289400	-	CDS	0.0188481	LOC_Os02g24642	photosystem II reaction center protein K precursor, putative, expressed
Chr2	15963950	15964000	-	CDS	0.0331094	LOC_Os02g27130	expressed protein
Chr2	17521300	17521350	-	5'-UTR	0.0188481	LOC_Os02g29500	expressed protein
Chr2	17521450	17521500	-	5'-UTR	0.00342474	LOC_Os02g29500	expressed protein
Chr2	19048500	19048550	-	5'-UTR	0.0181398	LOC_Os02g32250	retrotransposon protein, putative, unclassified, expressed
Chr2	19203250	19203350	-	3'-UTR	0.0227134	LOC_Os02g32469	expressed protein
Chr2	19203600	19203700	-	5'-UTR	0.00282763	LOC_Os02g32469	expressed protein
Chr2	19204100	19204150	-	5'-UTR	0.000131141	LOC_Os02g32469	expressed protein
Chr2	19325950	19326000	-	3'-UTR	0.00190915	LOC_Os02g32610	protein kinase domain containing protein, expressed
Chr2	19331700	19331750	-	CDS	0.00573083	LOC_Os02g32610	protein kinase domain containing protein, expressed
Chr2	19414500	19414600	-	Intron	3.33067e-16	LOC_Os02g32690	pleiotropic drug resistance protein 15, putative, expressed
Chr2	23653450	23653500	-	3'-UTR	0.0295495	LOC_Os02g39160	hydroxymethylbutenyl 4-diphosphate synthase, putative, expressed
Chr2	24140300	24140350	-	CDS	0.0188481	LOC_Os02g39920	AT hook motif family protein, expressed
Chr2	24973700	24973750	-	3'-UTR	0.00180183	LOC_Os02g41630	phenylalanine ammonia-lyase, putative, expressed
Chr2	24974100	24974150	-	CDS	0.0023234	LOC_Os02g41630	phenylalanine ammonia-lyase, putative, expressed
Chr2	24974550	24974600	-	CDS	0.0158981	LOC_Os02g41630	phenylalanine ammonia-lyase, putative, expressed
Chr2	24974700	24974750	-	CDS	0.0182265	LOC_Os02g41630	phenylalanine ammonia-lyase, putative, expressed
Chr2	24974950	24975000	-	CDS	0.0365497	LOC_Os02g41630	phenylalanine ammonia-lyase, putative, expressed
Chr2	24976850	24976900	-	CDS	1.57782e-07	LOC_Os02g41630	phenylalanine ammonia-lyase, putative, expressed
Chr2	25950050	25950100	-	CDS	0.0188481	LOC_Os02g43090	myristoyl-acyl carrier protein thioesterase, chloroplast precursor, putative, expressed
Chr2	26993450	26993500	-	5'-UTR	0.029494	LOC_Os02g44550	NADP-dependent malic enzyme, putative, expressed
Chr2	27079700	27079750	-	CDS	0.0188481	LOC_Os02g44690	HSPC171 protein, putative, expressed
Chr2	28279650	28279700	-	5'-UTR	0.0188481	LOC_Os02g46420	transposon protein, putative, unclassified, expressed
Chr2	28435750	28435800	-	CDS	0.0188481	LOC_Os02g46610	zinc-binding protein, putative, expressed
Chr2	28435900	28435950	-	CDS	0.0188481	LOC_Os02g46610	zinc-binding protein, putative, expressed
Chr2	28627600	28627650	-	3'-UTR	0.0188481	LOC_Os02g46920	expressed protein
Chr2	29725800	29725850	-	3'-UTR	0.00573083	LOC_Os02g48560	fatty acid desaturase, putative, expressed
Chr2	29726400	29726450	-	CDS	0.0188481	LOC_Os02g48560	fatty acid desaturase, putative, expressed
Chr2	31023700	31023750	-	3'-UTR	0.029494	LOC_Os02g50799	nuclear-pore anchor, putative, expressed
Chr2	32915850	32915900	-	CDS	0.029494	LOC_Os02g53750	tyrosine protein kinase domain containing protein, putative, expressed
Chr2	35093050	35093100	-	3'-UTR	0.034035	LOC_Os02g57290	cytochrome P450, putative, expressed
Chr2	35093200	35093250	-	3'-UTR	0.00945163	LOC_Os02g57290	cytochrome P450, putative, expressed
Chr2	35838000	35838050	-	CDS	0.0188481	LOC_Os02g58640	tumor susceptibility gene 101, putative, expressed
Chr3	958800	958850	-	CDS	0.0331094	LOC_Os03g02590	peroxisomal biogenesis factor 11, putative, expressed
Chr3	959450	959500	-	Intron	0.0188481	LOC_Os03g02590	peroxisomal biogenesis factor 11, putative, expressed
Chr3	1204050	1204100	-	CDS	0.0188481	LOC_Os03g02970	Dicer, putative, expressed
Chr3	1244400	1244450	-	CDS	0.029494	LOC_Os03g03034	flavonol synthase/flavanone 3-hydroxylase, putative, expressed
Chr3	1271100	1271150	-	CDS	0.0121869	LOC_Os03g03070	transcription factor, putative, expressed
Chr3	1271250	1271300	-	CDS	0.029494	LOC_Os03g03070	transcription factor, putative, expressed
Chr3	1787900	1787950	-	3'-UTR	0.000130192	LOC_Os03g03910	catalase domain containing protein, expressed
Chr3	1788100	1788150	-	CDS	0.0019363	LOC_Os03g03910	catalase domain containing protein, expressed
Chr3	1788750	1788800	-	CDS	0.0365497	LOC_Os03g03910	catalase domain containing protein, expressed
Chr3	1789400	1789450	-	CDS	0.0155681	LOC_Os03g03910	catalase domain containing protein, expressed
Chr3	2653900	2653950	-	CDS	0.0188481	LOC_Os03g05390	Citrate transporter protein, putative, expressed
Chr3	2923750	2923800	-	Intron	0.0188481	LOC_Os03g05830	transposon protein, putative, CACTA, En/Spm sub-class, expressed
Chr3	3126300	3126350	-	3'-UTR	0.0334401	LOC_Os03g06240	YT521-B-like family domain containing protein, expressed
Chr3	4372800	4372850	-	CDS	0.0375361	LOC_Os03g08500	AP2 domain containing protein, expressed
Chr3	4683050	4683100	-	CDS	0.0334401	LOC_Os03g09020	dehydrogenase, putative, expressed
Chr3	5775250	5775300	-	CDS	0.0331094	LOC_Os03g11220	keratin, type I cytoskeletal 9, putative, expressed
Chr3	6521250	6521300	-	CDS	0.0331094	LOC_Os03g12360	trehalose-6-phosphate synthase, putative, expressed
Chr3	7030750	7030800	-	CDS	0.0121869	LOC_Os03g13010	U-box domain containing protein, expressed
Chr3	7103450	7103500	-	Intron	4.21885e-15	LOC_Os03g13170	ubiquitin fusion protein, putative, expressed
Chr3	7103550	7103650	-	Intron	0.0184864	LOC_Os03g13170	ubiquitin fusion protein, putative, expressed
Chr3	7965850	7965950	-	CDS	0.0306663	LOC_Os03g14654	LTPL108 - Protease inhibitor/seed storage/LTP family protein precursor, expressed
Chr3	8011450	8011500	-	3'-UTR	0.00745309	LOC_Os03g14730	gibberellin receptor GID1L2, putative, expressed
Chr3	8172800	8172850	-	CDS	0.029494	LOC_Os03g14980	lissencephaly type-1-like homology motif, putative, expressed
Chr3	8173550	8173600	-	CDS	0.029494	LOC_Os03g14980	lissencephaly type-1-like homology motif, putative, expressed
Chr3	8219400	8219450	-	CDS	0.00154716	LOC_Os03g15050	phosphoenolpyruvate carboxykinase, putative, expressed
Chr3	8219500	8219550	-	CDS	0.0334401	LOC_Os03g15050	phosphoenolpyruvate carboxykinase, putative, expressed
Chr3	8219650	8219700	-	CDS	0.0023234	LOC_Os03g15050	phosphoenolpyruvate carboxykinase, putative, expressed
Chr3	8220150	8220200	-	Intron	0.00573083	LOC_Os03g15050	phosphoenolpyruvate carboxykinase, putative, expressed
Chr3	8221850	8221900	-	5'-UTR	0.0188481	LOC_Os03g15050	phosphoenolpyruvate carboxykinase, putative, expressed
Chr3	8222000	8222050	-	CDS	0.00488416	LOC_Os03g15050	phosphoenolpyruvate carboxykinase, putative, expressed
Chr3	8253150	8253200	-	5'-UTR	0.0188481	LOC_Os03g15110	expressed protein
Chr3	9314550	9314600	-	CDS	0.00573083	LOC_Os03g16800	clathrin assembly protein, putative, expressed
Chr3	9316500	9316550	-	5'-UTR	0.0188481	LOC_Os03g16800	clathrin assembly protein, putative, expressed
Chr3	9452850	9452900	-	5'-UTR	0.0334401	LOC_Os03g17010	RNA recognition motif containing protein, putative, expressed
Chr3	9760800	9760850	-	3'-UTR	0.0121869	LOC_Os03g17570	response regulator receiver domain containing protein, expressed
Chr3	9761750	9761800	-	CDS	0.00268311	LOC_Os03g17570	response regulator receiver domain containing protein, expressed
Chr3	9762050	9762200	-	CDS	0.0154744	LOC_Os03g17570	response regulator receiver domain containing protein, expressed
Chr3	9763600	9763650	-	CDS	0.00232752	LOC_Os03g17570	response regulator receiver domain containing protein, expressed
Chr3	9767500	9767650	-	CDS	0.0198443	LOC_Os03g17570	response regulator receiver domain containing protein, expressed
Chr3	9768100	9768150	-	5'-UTR	0.029494	LOC_Os03g17570	response regulator receiver domain containing protein, expressed
Chr3	9815050	9815100	-	Intron	0.0188481	LOC_Os03g17634	PPR repeat domain containing protein, putative, expressed
Chr3	10120650	10120800	-	CDS	0.0164742	LOC_Os03g18130	asparagine synthetase, putative, expressed
Chr3	10824500	10824550	-	CDS	0.029494	LOC_Os03g19250	AMP-binding enzyme, putative, expressed
Chr3	12768650	12768700	-	CDS	0.0422589	LOC_Os03g22270	auxin-repressed protein, putative, expressed
Chr3	12906350	12906400	-	CDS	0.0282466	LOC_Os03g22490	heavy metal-associated domain containing protein, expressed
Chr3	12906700	12906750	-	CDS	0.0182491	LOC_Os03g22490	heavy metal-associated domain containing protein, expressed
Chr3	12906900	12907150	-	CDS	0.0169536	LOC_Os03g22490	heavy metal-associated domain containing protein, expressed
Chr3	12907500	12907550	-	5'-UTR	0.0188481	LOC_Os03g22490	heavy metal-associated domain containing protein, expressed
Chr3	13860400	13860450	-	CDS	0.0334401	LOC_Os03g24339	PWWP domain containing protein, expressed
Chr3	21098700	21098750	-	Intron	0.0165949	LOC_Os03g38000	40S ribosomal protein S3-1, putative, expressed
Chr3	22169800	22169850	-	5'-UTR	3.77874e-05	LOC_Os03g39860	acyl carrier protein, putative, expressed
Chr3	22225550	22225600	-	CDS	0.00061949	LOC_Os03g40010	DEK C terminal domain containing protein, expressed
Chr3	22225800	22225950	-	CDS	0.00853097	LOC_Os03g40010	DEK C terminal domain containing protein, expressed
Chr3	22226000	22226050	-	CDS	0.00745309	LOC_Os03g40010	DEK C terminal domain containing protein, expressed
Chr3	22238700	22238750	-	5'-UTR	0.0188481	LOC_Os03g40020	PPR repeat containing protein, expressed
Chr3	24220250	24220300	-	3'-UTR	0.00573083	LOC_Os03g43430	mttA/Hcf106 family protein, putative, expressed
Chr3	25043200	25043250	-	CDS	0.029494	LOC_Os03g44500	serine/threonine protein phosphatase, putative, expressed
Chr3	25859900	25859950	-	CDS	0.0188481	LOC_Os03g45779	expressed protein
Chr3	25860700	25860750	-	5'-UTR	0.029494	LOC_Os03g45779	expressed protein
Chr3	26895050	26895100	-	Intron	0.0300743	LOC_Os03g47560	retrotransposon protein, putative, unclassified, expressed
Chr3	27060450	27060500	-	CDS	0.000130192	LOC_Os03g47740	homeodomain protein, putative, expressed
Chr3	28266300	28266350	-	5'-UTR	0.0121869	LOC_Os03g49630	expressed protein
Chr3	29950750	29950800	-	3'-UTR	0.0158981	LOC_Os03g52170	4-hydroxy-3-methylbut-2-enyl diphosphate reductase, putative, expressed
Chr3	30208200	30208250	-	5'-UTR	0.0188481	LOC_Os03g52690	CBS domain containing membrane protein, putative, expressed
Chr3	30581750	30581800	-	CDS	0.0188481	LOC_Os03g53280	WD domain containing protein, putative, expressed
Chr3	31180800	31180850	-	Intron	0.00401793	LOC_Os03g54860	60S ribosomal protein L13a-2, putative, expressed
Chr3	31182900	31182950	-	Intron	0.012403	LOC_Os03g54860	60S ribosomal protein L13a-2, putative, expressed
Chr3	31185050	31185100	-	Intron	0.00819751	LOC_Os03g54860	60S ribosomal protein L13a-2, putative, expressed
Chr3	31187100	31187150	-	Intron	3.48227e-09	LOC_Os03g54860	60S ribosomal protein L13a-2, putative, expressed
Chr3	31605900	31605950	-	CDS	0.0485651	LOC_Os03g55540	ZOS3-18 - C2H2 zinc finger protein, expressed
Chr3	31819850	31819900	-	CDS	0.0334401	LOC_Os03g55874	ATP synthase subunit beta, putative, expressed
Chr3	31820100	31820150	-	Intron	0.0188481	LOC_Os03g55874	ATP synthase subunit beta, putative, expressed
Chr3	31820400	31820450	-	CDS	0.0176264	LOC_Os03g55874	ATP synthase subunit beta, putative, expressed
Chr3	31820950	31821000	-	CDS	0.000319122	LOC_Os03g55874	ATP synthase subunit beta, putative, expressed
Chr3	32086400	32086450	-	CDS	0.0158981	LOC_Os03g56280	lactate/malate dehydrogenase, putative, expressed
Chr3	32255100	32255150	-	5'-UTR	0.0188481	LOC_Os03g56630	transposon protein, putative, unclassified, expressed
Chr3	32273250	32273300	-	Intron	0.0188481	LOC_Os03g56670	#N/A
Chr3	32935350	32935400	-	5'-UTR	3.50775e-05	LOC_Os03g57790	ubiquitin-conjugating enzyme, putative, expressed
Chr3	33292800	33292850	-	CDS	0.0188481	LOC_Os03g58430	40S ribosomal protein S15, putative, expressed
Chr3	33292900	33292950	-	CDS	0.0188481	LOC_Os03g58430	40S ribosomal protein S15, putative, expressed
Chr3	33745200	33745250	-	CDS	0.0188481	LOC_Os03g59264	calreticulin family protein, expressed
Chr3	33792450	33792500	-	CDS	0.00573083	LOC_Os03g59360	remorin, putative, expressed
Chr3	34560700	34560750	-	5'-UTR	7.25087e-13	LOC_Os03g60820	transporter, major facilitator superfamily domain containing protein, expressed
Chr4	552400	552450	-	CDS	0.0188481	LOC_Os04g01874	protein kinase, putative, expressed
Chr4	5663600	5663650	-	Intron	0.00157835	LOC_Os04g10420	CW7, putative, expressed
Chr4	9110750	9110850	-	CDS	0.0107656	LOC_Os04g16736	photosystem I assembly protein ycf3, putative, expressed
Chr4	9111500	9111550	-	Intron	0.0320698	LOC_Os04g16736	photosystem I assembly protein ycf3, putative, expressed
Chr4	9111800	9111900	-	CDS	0.00895888	LOC_Os04g16736	photosystem I assembly protein ycf3, putative, expressed
Chr4	9111950	9112000	-	Intron	0.00573083	LOC_Os04g16736	photosystem I assembly protein ycf3, putative, expressed
Chr4	9112100	9112150	-	Intron	0.000289772	LOC_Os04g16736	photosystem I assembly protein ycf3, putative, expressed
Chr4	9112200	9112300	-	Intron	0.00286692	LOC_Os04g16736	photosystem I assembly protein ycf3, putative, expressed
Chr4	9112350	9112450	-	Intron	0.000210381	LOC_Os04g16736	photosystem I assembly protein ycf3, putative, expressed
Chr4	9117050	9117200	-	CDS	0.013717	LOC_Os04g16742	NADPH-dependent oxidoreductase, putative, expressed
Chr4	9117500	9117600	-	Intron	0.01762	LOC_Os04g16742	NADPH-dependent oxidoreductase, putative, expressed
Chr4	9117800	9117850	-	CDS	0.00349147	LOC_Os04g16742	NADPH-dependent oxidoreductase, putative, expressed
Chr4	9130200	9130250	-	CDS	0.0421629	LOC_Os04g16760	photosystem I P700 chlorophyll a apoprotein A1, putative, expressed
Chr4	9130550	9130600	-	CDS	0.0429748	LOC_Os04g16760	photosystem I P700 chlorophyll a apoprotein A1, putative, expressed
Chr4	9131600	9131650	-	Intron	0.0158981	LOC_Os04g16762	photosystem I assembly protein ycf3, putative
Chr4	9131900	9132100	-	Intron	0.000697862	LOC_Os04g16762	photosystem I assembly protein ycf3, putative
Chr4	9132200	9132250	-	CDS	0.0181398	LOC_Os04g16762	photosystem I assembly protein ycf3, putative
Chr4	9132550	9132700	-	Intron	0.00628408	LOC_Os04g16762	photosystem I assembly protein ycf3, putative
Chr4	9161150	9161200	-	5'-UTR	0.0023234	LOC_Os04g16844	cytochrome b6-f complex subunit 4, putative, expressed
Chr4	9165350	9165450	-	CDS	0.0148855	LOC_Os04g16854	NADPH-dependent oxidoreductase, putative, expressed
Chr4	9165850	9165950	-	Intron	0.0195128	LOC_Os04g16854	NADPH-dependent oxidoreductase, putative, expressed
Chr4	9166150	9166200	-	CDS	0.00272201	LOC_Os04g16854	NADPH-dependent oxidoreductase, putative, expressed
Chr4	9167200	9167250	-	CDS	0.0331094	LOC_Os04g16856	chloroplast 30S ribosomal protein S7, putative, expressed
Chr4	9167300	9167350	-	CDS	0.00640183	LOC_Os04g16856	chloroplast 30S ribosomal protein S7, putative, expressed
Chr4	9199150	9199250	-	CDS	0.00256177	LOC_Os04g16886	chloroplast 30S ribosomal protein S7, putative, expressed
Chr4	9199400	9199450	-	CDS	0.00190915	LOC_Os04g16886	chloroplast 30S ribosomal protein S7, putative, expressed
Chr4	9563350	9563400	-	CDS	0.029494	LOC_Os04g17479	expressed protein
Chr4	13652350	13652400	-	CDS	0.0282466	LOC_Os04g23890	AGC_PVPK_like_kin82y.10 - ACG kinases include homologs to PKA, PKG and PKC, expressed
Chr4	13652650	13652700	-	CDS	0.021789	LOC_Os04g23890	AGC_PVPK_like_kin82y.10 - ACG kinases include homologs to PKA, PKG and PKC, expressed
Chr4	13652850	13652900	-	CDS	0.00916041	LOC_Os04g23890	AGC_PVPK_like_kin82y.10 - ACG kinases include homologs to PKA, PKG and PKC, expressed
Chr4	13653000	13653050	-	CDS	0.00573083	LOC_Os04g23890	AGC_PVPK_like_kin82y.10 - ACG kinases include homologs to PKA, PKG and PKC, expressed
Chr4	16867300	16867350	-	CDS	0.0188481	LOC_Os04g28480	retrotransposon protein, putative, unclassified, expressed
Chr4	18607500	18607550	-	Intron	0.0188481	LOC_Os04g31120	OsFBK14 - F-box domain and kelch repeat containing protein, expressed
Chr4	18608950	18609000	-	5'-UTR	0.0188481	LOC_Os04g31120	OsFBK14 - F-box domain and kelch repeat containing protein, expressed
Chr4	19615100	19615150	-	CDS	0.0477713	LOC_Os04g32590	transcription factor, putative, expressed
Chr4	19913650	19913700	-	3'-UTR	0.0365497	LOC_Os04g32950	calreticulin precursor protein, putative, expressed
Chr4	20025000	20025050	-	5'-UTR	0.0188481	LOC_Os04g33080	protein phosphatase 2C, putative, expressed
Chr4	22271750	22271800	-	5'-UTR	0.029494	LOC_Os04g36910	expressed protein
Chr4	22836000	22836050	-	3'-UTR	0.029494	LOC_Os04g38410	chlorophyll A-B binding protein, putative, expressed
Chr4	22836800	22836900	-	CDS	0.0118349	LOC_Os04g38410	chlorophyll A-B binding protein, putative, expressed
Chr4	23750850	23750900	-	CDS	0.0188481	LOC_Os04g39880	Os4bglu12 - beta-glucosidase, exo-beta-glucanase, expressed
Chr4	24326200	24326250	-	CDS	0.0381759	LOC_Os04g40990	malate synthase, glyoxysomal, putative, expressed
Chr4	24327550	24327600	-	CDS	0.00573083	LOC_Os04g40990	malate synthase, glyoxysomal, putative, expressed
Chr4	27371900	27371950	-	CDS	0.0239714	LOC_Os04g46220	ethylene-responsive transcription factor, putative, expressed
Chr4	27372300	27372350	-	CDS	0.0322474	LOC_Os04g46220	ethylene-responsive transcription factor, putative, expressed
Chr4	29896450	29896500	-	CDS	0.0188481	LOC_Os04g50120	zinc-binding protein, putative, expressed
Chr4	30765750	30765800	-	5'-UTR	0.0188481	LOC_Os04g51880	GHMP kinases ATP-binding protein, putative, expressed
Chr4	31302350	31302400	-	CDS	0.029494	LOC_Os04g52614	SHR5-receptor-like kinase, putative, expressed
Chr4	33031000	33031050	-	3'-UTR	0.0179389	LOC_Os04g55520	AP2 domain containing protein, expressed
Chr4	33624500	33624550	-	3'-UTR	0.0064213	LOC_Os04g56400	glutamine synthetase, catalytic domain containing protein, expressed
Chr4	33625250	33625300	-	CDS	0.000834492	LOC_Os04g56400	glutamine synthetase, catalytic domain containing protein, expressed
Chr4	33625400	33625450	-	CDS	0.000602659	LOC_Os04g56400	glutamine synthetase, catalytic domain containing protein, expressed
Chr4	33628800	33628850	-	CDS	0.0322474	LOC_Os04g56400	glutamine synthetase, catalytic domain containing protein, expressed
Chr4	33629100	33629150	-	CDS	0.00573083	LOC_Os04g56400	glutamine synthetase, catalytic domain containing protein, expressed
Chr4	33629250	33629300	-	CDS	0.00548247	LOC_Os04g56400	glutamine synthetase, catalytic domain containing protein, expressed
Chr4	33629700	33629750	-	CDS	0.0248148	LOC_Os04g56400	glutamine synthetase, catalytic domain containing protein, expressed
Chr4	33629850	33629950	-	CDS	0.0155512	LOC_Os04g56400	glutamine synthetase, catalytic domain containing protein, expressed
Chr4	33630100	33630150	-	CDS	0.00391815	LOC_Os04g56400	glutamine synthetase, catalytic domain containing protein, expressed
Chr4	33630600	33630650	-	CDS	0.00611731	LOC_Os04g56400	glutamine synthetase, catalytic domain containing protein, expressed
Chr4	33767200	33767250	-	CDS	0.00167292	LOC_Os04g56630	transposon protein, putative, unclassified, expressed
Chr4	34088400	34088450	-	3'-UTR	0.0331094	LOC_Os04g57220	ubiquitin-conjugating enzyme, putative, expressed
Chr4	34090350	34090400	-	5'-UTR	0.0181398	LOC_Os04g57220	ubiquitin-conjugating enzyme, putative, expressed
Chr4	34559200	34559250	-	CDS	0.029494	LOC_Os04g58020	MYB_Al protein, putative, expressed
Chr4	34694600	34694650	-	3'-UTR	0.0334401	LOC_Os04g58280	stem-specific protein TSJT1, putative, expressed
Chr4	34695250	34695300	-	CDS	0.0100418	LOC_Os04g58280	stem-specific protein TSJT1, putative, expressed
Chr4	34695500	34695550	-	Intron	0.000472845	LOC_Os04g58280	stem-specific protein TSJT1, putative, expressed
Chr4	34909100	34909300	-	CDS	0.0164867	LOC_Os04g58710	AMP-binding domain containing protein, expressed
Chr4	34909350	34909400	-	CDS	0.0145973	LOC_Os04g58710	AMP-binding domain containing protein, expressed
Chr4	34909800	34909850	-	CDS	0.00357205	LOC_Os04g58710	AMP-binding domain containing protein, expressed
Chr4	35215700	35215750	-	CDS	0.0188481	LOC_Os04g59200	peroxidase precursor, putative, expressed
Chr4	35216600	35216650	-	5'-UTR	0.0334401	LOC_Os04g59200	peroxidase precursor, putative, expressed
Chr5	408050	408100	-	CDS	0.0101775	LOC_Os05g01675	photosystem I P700 chlorophyll a apoprotein A1, putative, expressed
Chr5	408350	408400	-	CDS	0.0474717	LOC_Os05g01675	photosystem I P700 chlorophyll a apoprotein A1, putative, expressed
Chr5	1159000	1159050	-	CDS	0.0407379	LOC_Os05g03040	AP2 domain containing protein, expressed
Chr5	1506750	1506800	-	CDS	0.034035	LOC_Os05g03550	MYB family transcription factor, putative, expressed
Chr5	1507700	1507750	-	Intron	0.0188481	LOC_Os05g03550	MYB family transcription factor, putative, expressed
Chr5	2840600	2840650	-	5'-UTR	0.029494	LOC_Os05g05700	cullin, putative, expressed
Chr5	2972550	2972600	-	CDS	0.029494	LOC_Os05g05940	stress-related protein, putative, expressed
Chr5	2975850	2975900	-	CDS	0.000730906	LOC_Os05g05950	TOC159, putative, expressed
Chr5	2976100	2976150	-	CDS	0.0331094	LOC_Os05g05950	TOC159, putative, expressed
Chr5	2976650	2976700	-	CDS	0.029494	LOC_Os05g05950	TOC159, putative, expressed
Chr5	5928450	5928500	-	3'-UTR	0.0188481	LOC_Os05g10754	expressed protein
Chr5	6360750	6360800	-	CDS	0.0331094	LOC_Os05g11260	expressed protein
Chr5	6361200	6361250	-	CDS	0.0381759	LOC_Os05g11260	expressed protein
Chr5	6361600	6361650	-	CDS	0.0334401	LOC_Os05g11260	expressed protein
Chr5	6361700	6361750	-	CDS	0.0158981	LOC_Os05g11260	expressed protein
Chr5	6361900	6361950	-	CDS	0.0188481	LOC_Os05g11260	expressed protein
Chr5	6362200	6362250	-	CDS	0.0188481	LOC_Os05g11260	expressed protein
Chr5	7746950	7747050	-	CDS	0.0012512	LOC_Os05g13940	retrotransposon protein, putative, unclassified, expressed
Chr5	7747350	7747400	-	CDS	0.0328357	LOC_Os05g13940	retrotransposon protein, putative, unclassified, expressed
Chr5	7747500	7747550	-	CDS	0	LOC_Os05g13940	retrotransposon protein, putative, unclassified, expressed
Chr5	7747650	7747750	-	CDS	0.0228097	LOC_Os05g13940	retrotransposon protein, putative, unclassified, expressed
Chr5	7747800	7747900	-	CDS	0.000749993	LOC_Os05g13940	retrotransposon protein, putative, unclassified, expressed
Chr5	7850100	7850200	-	CDS	0.0173731	LOC_Os05g14040	G-patch domain containing protein, expressed
Chr5	12959250	12959300	-	CDS	7.77156e-16	LOC_Os05g22840	expressed protein
Chr5	12959700	12959750	-	Intron	0.000101884	LOC_Os05g22840	expressed protein
Chr5	12960000	12960200	-	Intron	0.00392827	LOC_Os05g22840	expressed protein
Chr5	12960300	12960450	-	CDS	1.08124e-06	LOC_Os05g22840	expressed protein
Chr5	13065900	13065950	-	CDS	0.0188481	LOC_Os05g22940	acetyl-CoA carboxylase, putative, expressed
Chr5	18107350	18107400	-	CDS	0.0188481	LOC_Os05g31140	glycosyl hydrolases family 17, putative, expressed
Chr5	18167600	18167650	-	5'-UTR	0.0188481	LOC_Os05g31230	N-acetyltransferase ESCO1, putative, expressed
Chr5	19780750	19780800	-	3'-UTR	0.00573083	LOC_Os05g33630	inosine-uridine preferring nucleoside hydrolase family protein, putative, expressed
Chr5	19957500	19957550	-	CDS	0.0188481	LOC_Os05g33840	transketolase, putative, expressed
Chr5	19957700	19957750	-	CDS	0.0188481	LOC_Os05g33840	transketolase, putative, expressed
Chr5	20279500	20279550	-	5'-UTR	0.00573083	LOC_Os05g34260	transposon protein, putative, Ac/Ds sub-class, expressed
Chr5	20971900	20971950	-	CDS	0.0407379	LOC_Os05g35320	ATP synthase like protein, putative, expressed
Chr5	22626100	22626150	-	CDS	0.0331094	LOC_Os05g38570	riboflavin biosynthesis protein ribAB, chloroplast precursor, putative, expressed
Chr5	24327250	24327300	-	5'-UTR	0.0331094	LOC_Os05g41550	expressed protein
Chr5	26809600	26809650	-	CDS	0.0121869	LOC_Os05g46230	NAP domain containing protein, putative, expressed
Chr5	27461700	27461750	-	CDS	0.0188481	LOC_Os05g47890	WD domain, G-beta repeat domain containing protein, expressed
Chr5	28707500	28707550	-	Intron	0.0188481	LOC_Os05g50090	oxidoreductase, 2OG-FeII oxygenase domain containing protein, putative, expressed
Chr5	29144350	29144400	-	CDS	0.000302802	LOC_Os05g50810	CAMK_CAMK_like.5 - CAMK includes calcium/calmodulin depedent protein kinases, expressed
Chr5	29487450	29487500	-	CDS	0.029494	LOC_Os05g51420	hypersensitive-induced response protein, putative, expressed
Chr5	29487550	29487600	-	CDS	0.0334401	LOC_Os05g51420	hypersensitive-induced response protein, putative, expressed
Chr5	29585550	29585600	-	CDS	0.0188481	LOC_Os05g51590	N-rich protein, putative, expressed
Chr5	29597600	29597650	-	CDS	0.0188481	LOC_Os05g51620	expressed protein
Chr6	149650	149700	-	3'-UTR	0.0358106	LOC_Os06g01210	plastocyanin, chloroplast precursor, putative, expressed
Chr6	149750	149800	-	CDS	0.0454345	LOC_Os06g01210	plastocyanin, chloroplast precursor, putative, expressed
Chr6	150000	150100	-	CDS	0.00327854	LOC_Os06g01210	plastocyanin, chloroplast precursor, putative, expressed
Chr6	479550	479600	-	CDS	0.0181398	LOC_Os06g01850	ferredoxin--NADP reductase, chloroplast precursor, putative, expressed
Chr6	481300	481350	-	CDS	0.0322474	LOC_Os06g01850	ferredoxin--NADP reductase, chloroplast precursor, putative, expressed
Chr6	811950	812000	-	CDS	0.0188481	LOC_Os06g02380	T-complex protein, putative, expressed
Chr6	812650	812700	-	CDS	0.029494	LOC_Os06g02380	T-complex protein, putative, expressed
Chr6	1643450	1643500	-	CDS	0.0381759	LOC_Os06g04020	histone H1, putative, expressed
Chr6	1936000	1936050	-	5'-UTR	0.0188481	LOC_Os06g04510	enolase, putative, expressed
Chr6	1936200	1936250	-	5'-UTR	0.00573083	LOC_Os06g04510	enolase, putative, expressed
Chr6	2008950	2009000	-	CDS	0.029494	LOC_Os06g04600	Brix domain containing protein, putative, expressed
Chr6	2239000	2239050	-	CDS	0.0158981	LOC_Os06g05060	ELF3 protein, putative, expressed
Chr6	3802750	3802800	-	CDS	0.029494	LOC_Os06g07830	ANTH/ENTH domain containing protein, putative, expressed
Chr6	3992900	3992950	-	Intron	0	LOC_Os06g08240	expressed protein
Chr6	4267050	4267100	-	CDS	0.00395601	LOC_Os06g08570	PPR repeat domain containing protein, putative, expressed
Chr6	4269350	4269400	-	5'-UTR	0.0334401	LOC_Os06g08570	PPR repeat domain containing protein, putative, expressed
Chr6	4376100	4376150	-	5'-UTR	0.00167292	LOC_Os06g08740	expressed protein
Chr6	4800150	4800200	-	CDS	0.0188481	LOC_Os06g09450	sucrose synthase, putative, expressed
Chr6	5034050	5034100	-	CDS	0.0188481	LOC_Os06g09880	EMB1270, putative, expressed
Chr6	6818700	6818750	-	CDS	0.029494	LOC_Os06g12580	pro-resilin precursor, putative, expressed
Chr6	7987350	7987400	-	5'-UTR	0.00167292	LOC_Os06g14324	caleosin related protein, putative, expressed
Chr6	8069400	8069450	-	CDS	0.0331094	LOC_Os06g14420	hydrolase, NUDIX family, domain containing protein, expressed
Chr6	14423800	14423850	-	3'-UTR	0.00488416	LOC_Os06g24594	exonuclease, putative, expressed
Chr6	20824700	20824750	-	CDS	0.00167292	LOC_Os06g35670	expressed protein
Chr6	23573000	23573050	-	CDS	0.000130192	LOC_Os06g39708	photosystem II P680 chlorophyll A apoprotein, putative, expressed
Chr6	23573600	23573650	-	CDS	0.0100225	LOC_Os06g39708	photosystem II P680 chlorophyll A apoprotein, putative, expressed
Chr6	23854150	23854200	-	CDS	0.029494	LOC_Os06g40080	heme oxygenase 1, putative, expressed
Chr6	23857550	23857600	-	CDS	0.0331094	LOC_Os06g40080	heme oxygenase 1, putative, expressed
Chr6	24404750	24404800	-	CDS	0.0334401	LOC_Os06g40940	glycine dehydrogenase, putative, expressed
Chr6	25210300	25210350	-	CDS	0.0334401	LOC_Os06g41990	M16 domain containing zinc peptidase, putative, expressed
Chr6	25210450	25210500	-	CDS	0.0158981	LOC_Os06g41990	M16 domain containing zinc peptidase, putative, expressed
Chr6	26412350	26412400	-	CDS	0.029494	LOC_Os06g43860	homeobox protein knotted-1, putative, expressed
Chr6	26843600	26843650	-	CDS	0.029494	LOC_Os06g44450	CCT/B-box zinc finger protein, putative, expressed
Chr6	26877900	26878050	-	CDS	0.0130533	LOC_Os06g44500	OsFBK17 - F-box domain and kelch repeat containing protein, expressed
Chr6	28184150	28184200	-	CDS	0.0188481	LOC_Os06g46438	NADPH-dependent oxidoreductase, putative
Chr6	28459300	28459350	-	CDS	0.0188481	LOC_Os06g46890	zinc finger C-x8-C-x5-C-x3-H type family protein, expressed
Chr6	30454250	30454300	-	Intron	0.00573083	LOC_Os06g50310	E2F-related protein, putative, expressed
Chr6	31211100	31211150	-	CDS	0.00190915	LOC_Os06g51510	expressed protein
Chr7	451050	451100	-	CDS	0.0485651	LOC_Os07g01760	aminotransferase, classes I and II, domain containing protein, expressed
Chr7	2137300	2137350	-	CDS	0.00408938	LOC_Os07g04840	PsbP, putative, expressed
Chr7	2137600	2137650	-	CDS	0.00982691	LOC_Os07g04840	PsbP, putative, expressed
Chr7	2137800	2137850	-	CDS	0.0322474	LOC_Os07g04840	PsbP, putative, expressed
Chr7	2138050	2138200	-	CDS	0.0295029	LOC_Os07g04840	PsbP, putative, expressed
Chr7	4776200	4776250	-	CDS	0.0188481	LOC_Os07g09150	expressed protein
Chr7	5891550	5891600	-	CDS	0.029494	LOC_Os07g10840	uncharacterized glycosyltransferase, putative, expressed
Chr7	5893300	5893350	-	CDS	0.000472845	LOC_Os07g10840	uncharacterized glycosyltransferase, putative, expressed
Chr7	7583350	7583400	-	5'-UTR	0.0331094	LOC_Os07g13234	expressed protein
Chr7	13119400	13119450	-	Intron	0.0188481	LOC_Os07g23270	transposon protein, putative, CACTA, En/Spm sub-class, expressed
Chr7	14231750	14231850	-	CDS	0.00100296	LOC_Os07g24992	uncharacterized protein ycf68, putative
Chr7	14231900	14231950	-	CDS	0.0367458	LOC_Os07g24992	uncharacterized protein ycf68, putative
Chr7	14575100	14575150	-	CDS	0.0188481	LOC_Os07g25460	ankyrin repeat domain containing protein, expressed
Chr7	19656900	19656950	-	CDS	0.0322474	LOC_Os07g32880	ATP synthase gamma chain, putative, expressed
Chr7	19657000	19657050	-	CDS	0.00489046	LOC_Os07g32880	ATP synthase gamma chain, putative, expressed
Chr7	19769300	19769350	-	3'-UTR	0.0188481	LOC_Os07g33110	CAMK_CAMK_like.33 - CAMK includes calcium/calmodulin depedent protein kinases, expressed
Chr7	19769400	19769450	-	3'-UTR	0.0188481	LOC_Os07g33110	CAMK_CAMK_like.33 - CAMK includes calcium/calmodulin depedent protein kinases, expressed
Chr7	21575050	21575100	-	3'-UTR	0.0331094	LOC_Os07g36090	ribosomal protein L28 protein, putative, expressed
Chr7	22317750	22317850	-	CDS	0.0211316	LOC_Os07g37240	chlorophyll A-B binding protein, putative, expressed
Chr7	22321150	22321200	-	CDS	0.029494	LOC_Os07g37250	THYLAKOID FORMATION1, chloroplast precursor, putative, expressed
Chr7	22321600	22321650	-	CDS	0.029494	LOC_Os07g37250	THYLAKOID FORMATION1, chloroplast precursor, putative, expressed
Chr7	22889850	22889900	-	CDS	0.0158981	LOC_Os07g38170	remorin, putative, expressed
Chr7	22890000	22890050	-	CDS	0.0179389	LOC_Os07g38170	remorin, putative, expressed
Chr7	22890300	22890350	-	CDS	0.0188481	LOC_Os07g38170	remorin, putative, expressed
Chr7	23051300	23051350	-	CDS	0.00548247	LOC_Os07g38360	expressed protein
Chr7	24356000	24356050	-	Intron	0.0188481	LOC_Os07g40640	expressed protein
Chr7	24356100	24356150	-	CDS	0.029494	LOC_Os07g40640	expressed protein
Chr7	25778150	25778200	-	CDS	0.0188481	LOC_Os07g43030	calmodulin-binding transcription activator, putative, expressed
Chr7	26895450	26895500	-	CDS	0.00573083	LOC_Os07g45070	FAT domain-containing protein, putative, expressed
Chr7	27724400	27724450	-	CDS	0.0328357	LOC_Os07g46460	ferredoxin-dependent glutamate synthase, chloroplast precursor, putative, expressed
Chr7	27735700	27735750	-	CDS	0.00911274	LOC_Os07g46460	ferredoxin-dependent glutamate synthase, chloroplast precursor, putative, expressed
Chr7	27735850	27735900	-	CDS	0.00264304	LOC_Os07g46460	ferredoxin-dependent glutamate synthase, chloroplast precursor, putative, expressed
Chr7	27736000	27736050	-	CDS	0.00167292	LOC_Os07g46460	ferredoxin-dependent glutamate synthase, chloroplast precursor, putative, expressed
Chr7	27901250	27901300	-	5'-UTR	0.00573738	LOC_Os07g46680	expressed protein
Chr7	28849850	28849900	-	CDS	0.0188481	LOC_Os07g48280	expressed protein
Chr7	28929650	28929700	-	3'-UTR	0.0121869	LOC_Os07g48410	RNA-binding zinc finger protein, putative, expressed
Chr7	28929850	28929900	-	CDS	0.0334401	LOC_Os07g48410	RNA-binding zinc finger protein, putative, expressed
Chr7	29547750	29547800	-	CDS	0.00916041	LOC_Os07g49330	phospholipase C, putative, expressed
Chr8	242100	242200	-	3'-UTR	0.0179282	LOC_Os08g01380	2Fe-2S iron-sulfur cluster binding domain containing protein, expressed
Chr8	242400	242450	-	CDS	0.0435569	LOC_Os08g01380	2Fe-2S iron-sulfur cluster binding domain containing protein, expressed
Chr8	2178950	2179000	-	CDS	0.0188481	LOC_Os08g04450	DAG protein, chloroplast precursor, putative, expressed
Chr8	3225200	3225250	-	CDS	0.010452	LOC_Os08g05940	retrotransposon protein, putative, unclassified, expressed
Chr8	3226200	3226250	-	CDS	0.010452	LOC_Os08g05940	retrotransposon protein, putative, unclassified, expressed
Chr8	3226400	3226450	-	CDS	0.0181398	LOC_Os08g05940	retrotransposon protein, putative, unclassified, expressed
Chr8	3518050	3518150	-	CDS	0.0404063	LOC_Os08g06344	transposon protein, putative, CACTA, En/Spm sub-class, expressed
Chr8	3518400	3518450	-	CDS	0.000563606	LOC_Os08g06344	transposon protein, putative, CACTA, En/Spm sub-class, expressed
Chr8	3545000	3545050	-	CDS	0.00573083	LOC_Os08g06380	CSLF6 - cellulose synthase-like family F; beta1,3;1,4 glucan synthase, expressed
Chr8	5806700	5806750	-	3'-UTR	0.0226044	LOC_Os08g10020	photosystem II 10 kDa polypeptide, chloroplast precursor, putative, expressed
Chr8	5807450	5807500	-	CDS	0.0174761	LOC_Os08g10020	photosystem II 10 kDa polypeptide, chloroplast precursor, putative, expressed
Chr8	5807900	5807950	-	CDS	0.0101717	LOC_Os08g10020	photosystem II 10 kDa polypeptide, chloroplast precursor, putative, expressed
Chr8	5808100	5808150	-	CDS	0.000321197	LOC_Os08g10020	photosystem II 10 kDa polypeptide, chloroplast precursor, putative, expressed
Chr8	7573150	7573200	-	CDS	0.00745309	LOC_Os08g12780	chloroplast envelope membrane protein, putative, expressed
Chr8	9249850	9249900	-	CDS	0.000180853	LOC_Os08g15236	uncharacterized protein ycf68, putative, expressed
Chr8	9249950	9250000	-	CDS	0.0444868	LOC_Os08g15236	uncharacterized protein ycf68, putative, expressed
Chr8	9250150	9250200	-	CDS	3.35981e-05	LOC_Os08g15236	uncharacterized protein ycf68, putative, expressed
Chr8	9269750	9269800	-	5'-UTR	0.0188481	LOC_Os08g15292	cytochrome b6-f complex subunit 4, putative, expressed
Chr8	9271700	9271750	-	3'-UTR	0.025026	LOC_Os08g15296	photosystem II reaction center protein H, putative, expressed
Chr8	9277350	9277400	-	CDS	0.0188481	LOC_Os08g15308	chloroplast 30S ribosomal protein S18, putative, expressed
Chr8	16240000	16240050	-	5'-UTR	0.00573083	LOC_Os08g26700	expressed protein
Chr8	16344900	16344950	-	5'-UTR	0.0121869	LOC_Os08g26870	wound responsive protein, putative, expressed
Chr8	17857000	17857050	-	CDS	0.0158981	LOC_Os08g29170	dehydrogenase, putative, expressed
Chr8	19887450	19887550	-	CDS	0.0096614	LOC_Os08g32080	CPuORF27 - conserved peptide uORF-containing transcript, expressed
Chr8	19887600	19887650	-	CDS	0.0188481	LOC_Os08g32080	CPuORF27 - conserved peptide uORF-containing transcript, expressed
Chr8	19887700	19887750	-	CDS	0.0121869	LOC_Os08g32080	CPuORF27 - conserved peptide uORF-containing transcript, expressed
Chr8	19888000	19888050	-	5'-UTR	0.0331094	LOC_Os08g32080	CPuORF27 - conserved peptide uORF-containing transcript, expressed
Chr8	19914950	19915000	-	CDS	0.0322474	LOC_Os08g32100	transposon protein, putative, CACTA, En/Spm sub-class, expressed
Chr8	19915100	19915150	-	CDS	0.0407379	LOC_Os08g32100	transposon protein, putative, CACTA, En/Spm sub-class, expressed
Chr8	19915350	19915400	-	CDS	0.000472845	LOC_Os08g32100	transposon protein, putative, CACTA, En/Spm sub-class, expressed
Chr8	19915500	19915550	-	CDS	0.0365497	LOC_Os08g32100	transposon protein, putative, CACTA, En/Spm sub-class, expressed
Chr8	19918550	19918600	-	CDS	0.0188481	LOC_Os08g32100	transposon protein, putative, CACTA, En/Spm sub-class, expressed
Chr8	20626400	20626450	-	CDS	0.0188481	LOC_Os08g33160	ZIM motif family protein, expressed
Chr8	21171700	21171800	-	CDS	0.00773983	LOC_Os08g33820	chlorophyll A-B binding protein, putative, expressed
Chr8	21171850	21171950	-	CDS	0.0137056	LOC_Os08g33820	chlorophyll A-B binding protein, putative, expressed
Chr8	21172400	21172500	-	CDS	0.026677	LOC_Os08g33820	chlorophyll A-B binding protein, putative, expressed
Chr8	22618550	22618600	-	CDS	0.0188481	LOC_Os08g35860	cytokinin dehydrogenase precursor, putative, expressed
Chr8	23053050	23053100	-	CDS	0.0188481	LOC_Os08g36500	nitrate reductase, putative, expressed
Chr8	23613550	23613600	-	CDS	0.029494	LOC_Os08g37370	mitochondrial carrier protein, putative, expressed
Chr8	23720500	23720550	-	CDS	0.00573083	LOC_Os08g37444	signal recognition particle receptor, putative, expressed
Chr8	23720650	23720700	-	CDS	0.0334401	LOC_Os08g37444	signal recognition particle receptor, putative, expressed
Chr8	23858850	23858900	-	3'-UTR	0.0188481	LOC_Os08g37670	plastocyanin-like domain containing protein, putative, expressed
Chr8	23859100	23859200	-	CDS	0.0170189	LOC_Os08g37670	plastocyanin-like domain containing protein, putative, expressed
Chr8	23859300	23859350	-	CDS	2.41716e-06	LOC_Os08g37670	plastocyanin-like domain containing protein, putative, expressed
Chr8	24043100	24043150	-	CDS	0.00573083	LOC_Os08g37960	RNA recognition motif containing protein, expressed
Chr8	24587750	24587800	-	5'-UTR	0.0176264	LOC_Os08g38900	caffeoyl-CoA O-methyltransferase, putative, expressed
Chr8	24696600	24696700	-	CDS	0.00627112	LOC_Os08g39090	coiled-coil domain containing 49, putative, expressed
Chr8	24720150	24720200	-	CDS	0.0188481	LOC_Os08g39140	heat shock protein, putative, expressed
Chr8	24828500	24828550	-	3'-UTR	0.00548247	LOC_Os08g39300	aminotransferase, putative, expressed
Chr8	24828650	24828700	-	3'-UTR	0.0422589	LOC_Os08g39300	aminotransferase, putative, expressed
Chr8	24828800	24828850	-	3'-UTR	0.00068881	LOC_Os08g39300	aminotransferase, putative, expressed
Chr8	24829150	24829200	-	3'-UTR	0.0303757	LOC_Os08g39300	aminotransferase, putative, expressed
Chr8	24829300	24829350	-	CDS	0.0145973	LOC_Os08g39300	aminotransferase, putative, expressed
Chr8	24829400	24829500	-	CDS	0.0143164	LOC_Os08g39300	aminotransferase, putative, expressed
Chr8	27548550	27548600	-	CDS	0.0334401	LOC_Os08g43550	MYB family transcription factor, putative, expressed
Chr8	27548650	27548700	-	CDS	0.0407379	LOC_Os08g43550	MYB family transcription factor, putative, expressed
Chr8	27548750	27548850	-	CDS	0.0111416	LOC_Os08g43550	MYB family transcription factor, putative, expressed
Chr8	28083550	28083650	-	3'-UTR	0.0208218	LOC_Os08g44680	photosystem I reaction center subunit II, chloroplast precursor, putative, expressed
Chr8	28083950	28084150	-	CDS	0.00651318	LOC_Os08g44680	photosystem I reaction center subunit II, chloroplast precursor, putative, expressed
Chr8	28172150	28172200	-	5'-UTR	0.0100418	LOC_Os08g44850	C2 domain containing protein, putative, expressed
Chr9	2360350	2360400	-	CDS	0.0121869	LOC_Os09g04440	DNA-binding protein, putative, expressed
Chr9	3054950	3055000	-	Intron	0.0121869	LOC_Os09g06464	CCT/B-box zinc finger protein, putative, expressed
Chr9	3057800	3057850	-	Intron	0.0188481	LOC_Os09g06464	CCT/B-box zinc finger protein, putative, expressed
Chr9	3595650	3595700	-	CDS	0.0188481	LOC_Os09g07300	BIG, putative, expressed
Chr9	4393000	4393050	-	Intron	0.0200682	LOC_Os09g08430	ribosomal protein L22, putative, expressed
Chr9	5327900	5327950	-	CDS	0.00342949	LOC_Os09g09830	heavy-metal-associated domain-containing protein, putative, expressed
Chr9	5479050	5479150	-	Intron	0.0173731	LOC_Os09g10054	disease resistance protein RPS2, putative, expressed
Chr9	6389550	6389600	-	CDS	0.0477713	LOC_Os09g11460	AP2 domain containing protein, expressed
Chr9	7016550	7016600	-	Intron	0.00745309	LOC_Os09g12300	serine/threonine-protein kinase NAK, putative, expressed
Chr9	8666650	8666700	-	CDS	0.0188481	LOC_Os09g14614	serine/arginine repetitive matrix protein 1, putative, expressed
Chr9	10606050	10606150	-	Intron	0.00278465	LOC_Os09g17329	expressed protein
Chr9	10607150	10607200	-	CDS	0.0188481	LOC_Os09g17329	expressed protein
Chr9	10610000	10610050	-	Intron	0.0136319	LOC_Os09g17329	expressed protein
Chr9	11496300	11496350	-	Intron	0.00167292	LOC_Os09g19229	protein kinase domain containing protein, expressed
Chr9	11551550	11551600	-	CDS	0.0188481	LOC_Os09g19300	retrotransposon protein, putative, unclassified, expressed
Chr9	11552350	11552400	-	CDS	0.0188481	LOC_Os09g19300	retrotransposon protein, putative, unclassified, expressed
Chr9	12550200	12550250	-	5'-UTR	0.0121869	LOC_Os09g20830	heat shock factor-binding protein 1, putative, expressed
Chr9	14506700	14506750	-	CDS	2.41716e-06	LOC_Os09g24406	uncharacterized protein ycf72, putative
Chr9	14696250	14696300	-	CDS	0.0188481	LOC_Os09g24700	expressed protein
Chr9	14696350	14696450	-	CDS	0.0238169	LOC_Os09g24700	expressed protein
Chr9	18470100	18470150	-	3'-UTR	0.0200055	LOC_Os09g30350	expressed protein
Chr9	18537300	18537350	-	CDS	0.0023234	LOC_Os09g30418	heat shock protein, putative, expressed
Chr9	19195950	19196000	-	CDS	0.021789	LOC_Os09g32169	expressed protein
Chr9	22570250	22570300	-	CDS	0.0188481	LOC_Os09g39270	ZOS9-20 - C2H2 zinc finger protein, expressed

## Sheet: Sheet3
Sheet3. Enriched RNAs with gene annotation in MHZ9-N vs GFP by RNA immunoprecipitation sequencing. Rep2
Chrosome	Bed_start	Bed_end	Strand	Annotation	P-value	Gene_id
Chr1	3986650	3986700	+	5'-UTR	0.023352	LOC_Os01g08200	ubiquitin carboxyl-terminal hydrolase 14, putative, expressed
Chr1	4095950	4096000	+	CDS	0.0324806	LOC_Os01g08350	ATP synthase subunit alpha, mitochondrial, putative, expressed
Chr1	4647150	4647250	+	CDS	0.0032374	LOC_Os01g09220	transposon protein, putative, CACTA, En/Spm sub-class, expressed
Chr1	5478600	5478650	+	5'-UTR	0.00993336	LOC_Os01g10400	expressed protein
Chr1	5478800	5478850	+	5'-UTR	0.0160908	LOC_Os01g10400	expressed protein
Chr1	5479350	5479400	+	CDS	0.00592641	LOC_Os01g10400	expressed protein
Chr1	6448500	6448550	+	CDS	0.0379345	LOC_Os01g11900	hhH-GPD superfamily base excision DNA repair protein, expressed
Chr1	6451800	6451850	+	CDS	0.00782765	LOC_Os01g11900	hhH-GPD superfamily base excision DNA repair protein, expressed
Chr1	6451950	6452000	+	CDS	0.00782765	LOC_Os01g11900	hhH-GPD superfamily base excision DNA repair protein, expressed
Chr1	6452100	6452150	+	CDS	0.023352	LOC_Os01g11900	hhH-GPD superfamily base excision DNA repair protein, expressed
Chr1	7517550	7517600	+	CDS	0.0440533	LOC_Os01g13480	glutaredoxin, putative, expressed
Chr1	7667450	7667500	+	CDS	0.0263865	LOC_Os01g13690	ligA, putative, expressed
Chr1	7667600	7667650	+	3'-UTR	0.0379345	LOC_Os01g13690	ligA, putative, expressed
Chr1	7712350	7712400	+	5'-UTR	0.023352	LOC_Os01g13760	dnaJ domain containing protein, expressed
Chr1	9875650	9875700	+	CDS	0.0445564	LOC_Os01g17170	magnesium-protoporphyrin IX monomethyl ester cyclase,chloroplast precursor, putative, expressed
Chr1	10134450	10134500	+	CDS	0.0171947	LOC_Os01g18080	retrotransposon protein, putative, unclassified, expressed
Chr1	11611600	11611650	+	CDS	0.0379345	LOC_Os01g20830	heavy metal-associated domain containing protein, expressed
Chr1	14451800	14451900	+	CDS	0.0260193	LOC_Os01g25484	ferredoxin--nitrite reductase, putative, expressed
Chr1	14451950	14452000	+	CDS	0.0440533	LOC_Os01g25484	ferredoxin--nitrite reductase, putative, expressed
Chr1	14452100	14452150	+	CDS	0.0149316	LOC_Os01g25484	ferredoxin--nitrite reductase, putative, expressed
Chr1	14452300	14452350	+	CDS	0.023352	LOC_Os01g25484	ferredoxin--nitrite reductase, putative, expressed
Chr1	16130650	16130700	+	CDS	0.023352	LOC_Os01g28790	PRAS-rich protein, putative, expressed
Chr1	16695950	16696000	+	Intron	0.0283433	LOC_Os01g29804	expressed protein
Chr1	17349350	17349400	+	5'-UTR	0.0013212	LOC_Os01g31690	oxygen-evolving enhancer protein 1, chloroplast precursor, putative, expressed
Chr1	17349450	17349500	+	CDS	0.0311029	LOC_Os01g31690	oxygen-evolving enhancer protein 1, chloroplast precursor, putative, expressed
Chr1	17349600	17349700	+	CDS	0.0178995	LOC_Os01g31690	oxygen-evolving enhancer protein 1, chloroplast precursor, putative, expressed
Chr1	17349750	17349800	+	CDS	0.00774163	LOC_Os01g31690	oxygen-evolving enhancer protein 1, chloroplast precursor, putative, expressed
Chr1	17350050	17350200	+	CDS	0.00768593	LOC_Os01g31690	oxygen-evolving enhancer protein 1, chloroplast precursor, putative, expressed
Chr1	17350500	17350550	+	3'-UTR	0.0459865	LOC_Os01g31690	oxygen-evolving enhancer protein 1, chloroplast precursor, putative, expressed
Chr1	18755350	18755450	+	5'-UTR	0.0379345	LOC_Os01g34060	MYB family transcription factor, putative, expressed
Chr1	19824800	19824850	+	5'-UTR	0.0149316	LOC_Os01g35789	expressed protein
Chr1	20034250	20034300	+	CDS	7.71403e-05	LOC_Os01g36220	bZIP transcription factor domain containing protein, expressed
Chr1	21415300	21415350	+	CDS	0.0283433	LOC_Os01g38229	peptidyl-prolyl isomerase, putative, expressed
Chr1	21424250	21424300	+	CDS	0.0440533	LOC_Os01g38229	peptidyl-prolyl isomerase, putative, expressed
Chr1	21881950	21882000	+	CDS	0.023352	LOC_Os01g38950	CK1_CaseinKinase_1.2 - CK1 includes the casein kinase 1 kinases, expressed
Chr1	21882850	21882900	+	CDS	0.00782765	LOC_Os01g38950	CK1_CaseinKinase_1.2 - CK1 includes the casein kinase 1 kinases, expressed
Chr1	22605000	22605050	+	CDS	0.0379345	LOC_Os01g40070	expressed protein
Chr1	23607500	23607600	+	CDS	0.0113107	LOC_Os01g41710	chlorophyll A-B binding protein, putative, expressed
Chr1	23607700	23607750	+	CDS	0.0310462	LOC_Os01g41710	chlorophyll A-B binding protein, putative, expressed
Chr1	23607800	23608100	+	CDS	0.00917494	LOC_Os01g41710	chlorophyll A-B binding protein, putative, expressed
Chr1	23608150	23608200	+	CDS	0.00891687	LOC_Os01g41710	chlorophyll A-B binding protein, putative, expressed
Chr1	24696750	24696800	+	3'-UTR	0.023352	LOC_Os01g43220	chitinase domain-containing protein 1 precursor, putative, expressed
Chr1	24995100	24995150	+	CDS	0.0379345	LOC_Os01g43630	adaptin, putative, expressed
Chr1	25696750	25696800	+	5'-UTR	0.0277857	LOC_Os01g45274	carbonic anhydrase, chloroplast precursor, putative, expressed
Chr1	25704100	25704150	+	CDS	0.0445564	LOC_Os01g45274	carbonic anhydrase, chloroplast precursor, putative, expressed
Chr1	25704300	25704450	+	CDS	0.022814	LOC_Os01g45274	carbonic anhydrase, chloroplast precursor, putative, expressed
Chr1	25704600	25704650	+	CDS	0.00326596	LOC_Os01g45274	carbonic anhydrase, chloroplast precursor, putative, expressed
Chr1	26260650	26260700	+	Intron	0.00782765	LOC_Os01g46169	GDSL-like lipase/acylhydrolase, putative, expressed
Chr1	27726700	27726800	+	CDS	0.023352	LOC_Os01g48380	PPR repeat domain containing protein, putative, expressed
Chr1	27922550	27922600	+	5'-UTR	0.023352	LOC_Os01g48690	ribosomal protein rpS20, putative, expressed
Chr1	28574150	28574200	+	CDS	0.0379345	LOC_Os01g49740	expressed protein
Chr1	28574600	28574650	+	CDS	0.023352	LOC_Os01g49740	expressed protein
Chr1	29560350	29560400	+	5'-UTR	0.0499542	LOC_Os01g51410	glycine dehydrogenase, putative, expressed
Chr1	30031000	30031050	+	5'-UTR	0.00877683	LOC_Os01g52240	chlorophyll A-B binding protein, putative, expressed
Chr1	30031100	30031150	+	CDS	0.0324806	LOC_Os01g52240	chlorophyll A-B binding protein, putative, expressed
Chr1	30031300	30031400	+	CDS	0.0436062	LOC_Os01g52240	chlorophyll A-B binding protein, putative, expressed
Chr1	30474750	30474800	+	CDS	0.023352	LOC_Os01g53020	heat shock protein DnaJ, putative, expressed
Chr1	30886100	30886150	+	3'-UTR	0.0379345	LOC_Os01g53720	expressed protein
Chr1	32472250	32472300	+	CDS	0.0379345	LOC_Os01g56350	PTAC12, putative, expressed
Chr1	32708850	32708900	+	3'-UTR	0.0130372	LOC_Os01g56670	glycosyl hydrolase family 47 domain contain protein, expressed
Chr1	32708950	32709050	+	3'-UTR	0.0331418	LOC_Os01g56670	glycosyl hydrolase family 47 domain contain protein, expressed
Chr1	32709100	32709150	+	3'-UTR	0.00789924	LOC_Os01g56670	glycosyl hydrolase family 47 domain contain protein, expressed
Chr1	33499000	33499050	+	CDS	0.0231063	LOC_Os01g57942	cytochrome b6, putative, expressed
Chr1	33499150	33499200	+	CDS	0.0458108	LOC_Os01g57942	cytochrome b6, putative, expressed
Chr1	33506150	33506300	+	5'-UTR	0.00303576	LOC_Os01g57960	retrotransposon protein, putative, unclassified, expressed
Chr1	33506500	33506650	+	5'-UTR	0.0180008	LOC_Os01g57960	retrotransposon protein, putative, unclassified, expressed
Chr1	33506750	33506800	+	5'-UTR	0.00254522	LOC_Os01g57960	retrotransposon protein, putative, unclassified, expressed
Chr1	33506900	33506950	+	5'-UTR	8.09067e-09	LOC_Os01g57960	retrotransposon protein, putative, unclassified, expressed
Chr1	33532000	33532100	+	5'-UTR	0.00903035	LOC_Os01g57968	expressed protein
Chr1	33532400	33532600	+	3'-UTR	0.00907103	LOC_Os01g57968	expressed protein
Chr1	33532650	33532800	+	3'-UTR	0.0022013	LOC_Os01g57968	expressed protein
Chr1	33532900	33533250	+	3'-UTR	0.00109375	LOC_Os01g57968	expressed protein
Chr1	33533350	33533450	+	3'-UTR	0.000975176	LOC_Os01g57968	expressed protein
Chr1	33533550	33533600	+	3'-UTR	0.0392306	LOC_Os01g57968	expressed protein
Chr1	33536200	33536250	+	Intron	0.00690444	LOC_Os01g57990	expressed protein
Chr1	33549500	33549550	+	CDS	0.0445564	LOC_Os01g58010	ATP synthase, A subunit family protein, putative, expressed
Chr1	33550000	33550050	+	Intron	0.00254522	LOC_Os01g58010	ATP synthase, A subunit family protein, putative, expressed
Chr1	33554350	33554400	+	CDS	2.06736e-06	LOC_Os01g58020	ribulose bisphosphate carboxylase large chain precursor, putative, expressed
Chr1	33554500	33554550	+	CDS	0.00897345	LOC_Os01g58020	ribulose bisphosphate carboxylase large chain precursor, putative, expressed
Chr1	33567400	33567450	+	CDS	0.023352	LOC_Os01g58035	expressed protein
Chr1	35848150	35848200	+	CDS	0.0379345	LOC_Os01g61930	SAC3/GANP family protein, putative, expressed
Chr1	39117250	39117300	+	3'-UTR	0.0459865	LOC_Os01g67364	retrotransposon protein, putative, Ty3-gypsy subclass, expressed
Chr1	39546300	39546350	+	Intron	0.00131602	LOC_Os01g68020	BTBZ2 - Bric-a-Brac, Tramtrack, and Broad Complex BTB domain with TAZ zinc finger and Calmodulin-binding domains, expressed
Chr1	39777850	39777900	+	5'-UTR	0.023352	LOC_Os01g68450	expressed protein
Chr1	41510250	41510300	+	5'-UTR	0.0445564	LOC_Os01g71630	#N/A
Chr1	41517200	41517250	+	5'-UTR	0.0284893	LOC_Os01g71630	#N/A
Chr1	43097300	43097400	+	CDS	0.0217957	LOC_Os01g74410	MYB family transcription factor, putative, expressed
Chr10	1534450	1534500	+	CDS	0.023352	LOC_Os10g03550	expressed protein
Chr10	1858350	1858450	+	5'-UTR	0.00203217	LOC_Os10g04050	transposon protein, putative, CACTA, En/Spm sub-class, expressed
Chr10	9315800	9315850	+	CDS	0.0458108	LOC_Os10g18340	expressed protein
Chr10	10023000	10023050	+	CDS	0.0379345	LOC_Os10g19970	expressed protein
Chr10	10790150	10790200	+	CDS	0.0149316	LOC_Os10g21190	#N/A
Chr10	10790250	10790300	+	Intron	0	LOC_Os10g21190	#N/A
Chr10	10790350	10790400	+	Intron	3.30173e-07	LOC_Os10g21190	#N/A
Chr10	10790450	10790500	+	Intron	0.00010458	LOC_Os10g21190	#N/A
Chr10	10790550	10790650	+	Intron	1.13828e-05	LOC_Os10g21190	#N/A
Chr10	10790700	10790750	+	Intron	0.000141736	LOC_Os10g21190	#N/A
Chr10	10790850	10791000	+	CDS	8.72485e-06	LOC_Os10g21190	#N/A
Chr10	10791050	10791100	+	CDS	5.12923e-14	LOC_Os10g21190	#N/A
Chr10	10839900	10839950	+	CDS	0.0306254	LOC_Os10g21238	ATP synthase B chain, putative, expressed
Chr10	10840050	10840200	+	Intron	0.00170635	LOC_Os10g21238	ATP synthase B chain, putative, expressed
Chr10	10840700	10840750	+	Intron	0.0112516	LOC_Os10g21238	ATP synthase B chain, putative, expressed
Chr10	10840850	10840900	+	CDS	0.00609364	LOC_Os10g21238	ATP synthase B chain, putative, expressed
Chr10	10840950	10841000	+	CDS	0.0149316	LOC_Os10g21238	ATP synthase B chain, putative, expressed
Chr10	10861300	10861350	+	CDS	0.046274	LOC_Os10g21268	ribulose bisphosphate carboxylase large chain precursor, putative, expressed
Chr10	10861700	10861750	+	CDS	0.00706622	LOC_Os10g21268	ribulose bisphosphate carboxylase large chain precursor, putative, expressed
Chr10	10861850	10862100	+	CDS	0.0107425	LOC_Os10g21268	ribulose bisphosphate carboxylase large chain precursor, putative, expressed
Chr10	10862200	10862450	+	CDS	0.0166498	LOC_Os10g21268	ribulose bisphosphate carboxylase large chain precursor, putative, expressed
Chr10	10862650	10862700	+	3'-UTR	0.0445564	LOC_Os10g21268	ribulose bisphosphate carboxylase large chain precursor, putative, expressed
Chr10	10876950	10877000	+	CDS	0.0179998	LOC_Os10g21310	photosystem II P680 chlorophyll A apoprotein, putative, expressed
Chr10	10878200	10878450	+	CDS	0.0066444	LOC_Os10g21322	photosystem II reaction center protein H, putative
Chr10	10888500	10888550	+	CDS	0.0459865	LOC_Os10g21356	uncharacterized protein ycf72, putative, expressed
Chr10	10910450	10910550	+	Intron	0.00543887	LOC_Os10g21396	NADPH-dependent oxidoreductase, putative, expressed
Chr10	15780800	15780850	+	5'-UTR	0.023352	LOC_Os10g30370	RNA recognition motif containing protein, putative, expressed
Chr10	17431450	17431500	+	CDS	0.0440533	LOC_Os10g33230	RNA recognition motif containing protein, putative, expressed
Chr10	18811300	18811350	+	CDS	0.023352	LOC_Os10g35210	expressed protein
Chr10	19130200	19130250	+	CDS	0.0440533	LOC_Os10g35770	E2F-related protein, putative, expressed
Chr10	19379950	19380000	+	5'-UTR	0.0379345	LOC_Os10g36260	expressed protein
Chr10	19380200	19380250	+	5'-UTR	0.00782765	LOC_Os10g36260	expressed protein
Chr10	19555100	19555150	+	5'-UTR	0.0379345	LOC_Os10g36550	CRP3 - Cysteine-rich family protein precursor, expressed
Chr10	19556400	19556500	+	CDS	0.0125426	LOC_Os10g36550	CRP3 - Cysteine-rich family protein precursor, expressed
Chr10	19556700	19556750	+	3'-UTR	0.0083506	LOC_Os10g36550	CRP3 - Cysteine-rich family protein precursor, expressed
Chr10	20455400	20455600	+	CDS	0.00282356	LOC_Os10g38196	uncharacterized protein ycf68, putative
Chr10	20470100	20470200	+	Intron	0.00136439	LOC_Os10g38216	photosystem I assembly protein ycf3, putative, expressed
Chr10	20470300	20470350	+	Intron	0.0123947	LOC_Os10g38216	photosystem I assembly protein ycf3, putative, expressed
Chr10	20470450	20470500	+	Intron	0.00609364	LOC_Os10g38216	photosystem I assembly protein ycf3, putative, expressed
Chr10	20470700	20470750	+	Intron	0.0168844	LOC_Os10g38216	photosystem I assembly protein ycf3, putative, expressed
Chr10	20470950	20471200	+	CDS	0.0177996	LOC_Os10g38216	photosystem I assembly protein ycf3, putative, expressed
Chr10	20471750	20471800	+	CDS	0.000175898	LOC_Os10g38216	photosystem I assembly protein ycf3, putative, expressed
Chr10	21327700	21327750	+	5'-UTR	0	LOC_Os10g39860	expressed protein
Chr10	22858450	22858500	+	CDS	0.006052	LOC_Os10g42430	transcription factor MYC7E, putative, expressed
Chr11	79600	79650	+	5'-UTR	0.0379345	LOC_Os11g01140	AGC_PVPK_like_kin82y.18 - ACG kinases include homologs to PKA, PKG and PKC, expressed
Chr11	4631000	4631050	+	3'-UTR	0.00782765	LOC_Os11g08670	NAD kinase, putative, expressed
Chr11	5401000	5401050	+	CDS	0.0379345	LOC_Os11g10060	transcriptional corepressor SEUSS, putative, expressed
Chr11	5420750	5420800	+	CDS	0.023352	LOC_Os11g10070	transcriptional corepressor SEUSS, putative, expressed
Chr11	6614286	6614336	+	CDS	0.0260264	LOC_Os11g11920	resistance protein, putative, expressed
Chr11	7661150	7661250	+	CDS	0.0374848	LOC_Os11g13890	chlorophyll A-B binding protein, putative, expressed
Chr11	7661650	7661850	+	3'-UTR	0.0114958	LOC_Os11g13890	chlorophyll A-B binding protein, putative, expressed
Chr11	7931800	7931850	+	5'-UTR	0.023352	LOC_Os11g14180	expressed protein
Chr11	8467450	8467500	+	5'-UTR	6.97928e-06	LOC_Os11g15040	S-adenosyl-L-methionine:benzoic acid/salicylic acid carboxyl methyltransferase, putative, expressed
Chr11	8467550	8467600	+	5'-UTR	0.0379345	LOC_Os11g15040	S-adenosyl-L-methionine:benzoic acid/salicylic acid carboxyl methyltransferase, putative, expressed
Chr11	8467700	8467750	+	5'-UTR	0.0175672	LOC_Os11g15040	S-adenosyl-L-methionine:benzoic acid/salicylic acid carboxyl methyltransferase, putative, expressed
Chr11	9629100	9629150	+	CDS	0.0239378	LOC_Os11g17290	expressed protein
Chr11	9630550	9630600	+	CDS	0.0397263	LOC_Os11g17290	expressed protein
Chr11	9630900	9630950	+	CDS	0.0249979	LOC_Os11g17290	expressed protein
Chr11	9631050	9631100	+	CDS	0.0370768	LOC_Os11g17290	expressed protein
Chr11	9631200	9631250	+	CDS	0.00762113	LOC_Os11g17290	expressed protein
Chr11	9633250	9633300	+	3'-UTR	0.023352	LOC_Os11g17290	expressed protein
Chr11	15438700	15438750	+	CDS	0.023352	LOC_Os11g26860	serine hydroxymethyltransferase, mitochondrial precursor, putative, expressed
Chr11	17230200	17230250	+	CDS	0.023352	LOC_Os11g29710	OsFBO4 - F-box and other domain containing protein, expressed
Chr11	17230400	17230450	+	CDS	0.023352	LOC_Os11g29710	OsFBO4 - F-box and other domain containing protein, expressed
Chr11	19758600	19758650	+	Intron	0.023352	LOC_Os11g33394	plant protein of unknown function domain containing protein, expressed
Chr11	23230650	23230700	+	CDS	0.0440533	LOC_Os11g39020	ABC transporter, ATP-binding protein, putative, expressed
Chr11	23231700	23231750	+	CDS	0.023352	LOC_Os11g39020	ABC transporter, ATP-binding protein, putative, expressed
Chr11	23231900	23231950	+	CDS	0.00782765	LOC_Os11g39020	ABC transporter, ATP-binding protein, putative, expressed
Chr11	23334500	23334550	+	5'-UTR	0.0171947	LOC_Os11g39190	NB-ARC domain containing protein, putative, expressed
Chr11	27400950	27401000	+	CDS	0.0379345	LOC_Os11g45280	protein kinase family protein, putative, expressed
Chr11	27725800	27725850	+	CDS	0.023352	LOC_Os11g45820	expressed protein
Chr11	28804300	28804400	+	5'-UTR	0.0200674	LOC_Os11g47760	DnaK family protein, putative, expressed
Chr11	28807500	28807550	+	CDS	0.023352	LOC_Os11g47760	DnaK family protein, putative, expressed
Chr11	28807600	28807650	+	CDS	0.0171477	LOC_Os11g47760	DnaK family protein, putative, expressed
Chr11	28900150	28900200	+	CDS	0.023352	LOC_Os11g47920	SCARECROW, putative, expressed
Chr12	81400	81450	+	CDS	0.0379345	LOC_Os12g01140	AGC_PVPK_like_kin82y.2 - ACG kinases include homologs to PKA, PKG and PKC, expressed
Chr12	126100	126150	+	CDS	0.00254522	LOC_Os12g01210	HCF152, putative, expressed
Chr12	653400	653450	+	CDS	0.023352	LOC_Os12g02140	hypothetical protein
Chr12	3542950	3543000	+	CDS	0.0168844	LOC_Os12g07210	expressed protein
Chr12	3543300	3543400	+	CDS	0.0189707	LOC_Os12g07210	expressed protein
Chr12	3543900	3543950	+	CDS	0.00150893	LOC_Os12g07210	expressed protein
Chr12	5614250	5614350	+	CDS	0.0374814	LOC_Os12g10580	ribulose bisphosphate carboxylase large chain precursor, putative, expressed
Chr12	5614700	5614750	+	CDS	0.000680938	LOC_Os12g10580	ribulose bisphosphate carboxylase large chain precursor, putative, expressed
Chr12	5615050	5615100	+	CDS	0.00664462	LOC_Os12g10580	ribulose bisphosphate carboxylase large chain precursor, putative, expressed
Chr12	5615200	5615300	+	CDS	0.0237369	LOC_Os12g10580	ribulose bisphosphate carboxylase large chain precursor, putative, expressed
Chr12	5653550	5653600	+	Intron	0.0129899	LOC_Os12g10604	retrotransposon protein, putative, unclassified
Chr12	5653650	5653700	+	Intron	0.0257373	LOC_Os12g10604	retrotransposon protein, putative, unclassified
Chr12	5768450	5768500	+	CDS	0.0171947	LOC_Os12g10740	leucine-rich repeat family protein, putative, expressed
Chr12	5768600	5768650	+	CDS	0.0379345	LOC_Os12g10740	leucine-rich repeat family protein, putative, expressed
Chr12	6641000	6641050	+	Intron	0.0171947	LOC_Os12g12110	expressed protein
Chr12	7710150	7710200	+	3'-UTR	0.0379345	LOC_Os12g13674	expressed protein
Chr12	9352750	9352800	+	CDS	0.0263865	LOC_Os12g16350	enoyl-CoA hydratase/isomerase family protein, putative, expressed
Chr12	10772550	10772600	+	5'-UTR	0.00782765	LOC_Os12g18650	Regulator of chromosome condensation domain containing protein, expressed
Chr12	10829750	10829800	+	Intron	0.0440533	LOC_Os12g18729	expressed protein
Chr12	10833050	10833100	+	CDS	0.023352	LOC_Os12g18729	expressed protein
Chr12	11320550	11320600	+	5'-UTR	0.00100755	LOC_Os12g19470	ribulose bisphosphate carboxylase small chain, chloroplast precursor, putative, expressed
Chr12	11321150	11321200	+	3'-UTR	0.0379345	LOC_Os12g19470	ribulose bisphosphate carboxylase small chain, chloroplast precursor, putative, expressed
Chr12	13105700	13105750	+	CDS	0.000808064	LOC_Os12g23180	3-beta hydroxysteroid dehydrogenase/isomerase family protein, putative, expressed
Chr12	13105800	13105850	+	CDS	0.0458108	LOC_Os12g23180	3-beta hydroxysteroid dehydrogenase/isomerase family protein, putative, expressed
Chr12	13116750	13116800	+	CDS	0.023352	LOC_Os12g23200	photosystem I reaction center subunit XI, chloroplast precursor, putative, expressed
Chr12	13116850	13116900	+	CDS	0.0284893	LOC_Os12g23200	photosystem I reaction center subunit XI, chloroplast precursor, putative, expressed
Chr12	13657150	13657200	+	5'-UTR	0.0379345	LOC_Os12g24020	rhodanese-like domain containing protein, putative, expressed
Chr12	13699400	13699450	+	CDS	0.00782765	LOC_Os12g24080	HECT-domain domain containing protein, expressed
Chr12	20499100	20499150	+	CDS	0.011911	LOC_Os12g33956	#N/A
Chr12	20499750	20499800	+	3'-UTR	0.00943396	LOC_Os12g33956	#N/A
Chr12	20503750	20503850	+	Intron	0.010262	LOC_Os12g33958	NADH-ubiquinone oxidoreductase 49 kDa subunit, putative, expressed
Chr12	20504200	20504300	+	CDS	0.0133166	LOC_Os12g33958	NADH-ubiquinone oxidoreductase 49 kDa subunit, putative, expressed
Chr12	20504400	20504800	+	Intron	0.0176415	LOC_Os12g33958	NADH-ubiquinone oxidoreductase 49 kDa subunit, putative, expressed
Chr12	20505450	20505550	+	Intron	0.0142469	LOC_Os12g33958	NADH-ubiquinone oxidoreductase 49 kDa subunit, putative, expressed
Chr12	20505900	20505950	+	CDS	0.0120405	LOC_Os12g33958	NADH-ubiquinone oxidoreductase 49 kDa subunit, putative, expressed
Chr12	20506000	20506050	+	CDS	0.023352	LOC_Os12g33958	NADH-ubiquinone oxidoreductase 49 kDa subunit, putative, expressed
Chr12	20506300	20506400	+	Intron	0.00750921	LOC_Os12g33958	NADH-ubiquinone oxidoreductase 49 kDa subunit, putative, expressed
Chr12	20506850	20506900	+	Intron	0.0283433	LOC_Os12g33958	NADH-ubiquinone oxidoreductase 49 kDa subunit, putative, expressed
Chr12	20507650	20507750	+	Intron	0.022029	LOC_Os12g33958	NADH-ubiquinone oxidoreductase 49 kDa subunit, putative, expressed
Chr12	20508950	20509000	+	CDS	0.00848976	LOC_Os12g33958	NADH-ubiquinone oxidoreductase 49 kDa subunit, putative, expressed
Chr12	20509150	20509200	+	CDS	0.00706622	LOC_Os12g33958	NADH-ubiquinone oxidoreductase 49 kDa subunit, putative, expressed
Chr12	20533200	20533300	+	CDS	0.0434078	LOC_Os12g34012	cytochrome c biosynthesis ccmC-like mitochondrial protein, putative, expressed
Chr12	20533650	20533700	+	CDS	0.0168844	LOC_Os12g34012	cytochrome c biosynthesis ccmC-like mitochondrial protein, putative, expressed
Chr12	20578200	20578250	+	5'-UTR	0.023352	LOC_Os12g34054	mitochondrial ribosomal protein S3, putative, expressed
Chr12	20578550	20578600	+	Intron	0.0380601	LOC_Os12g34054	mitochondrial ribosomal protein S3, putative, expressed
Chr12	20578900	20578950	+	Intron	0.0331278	LOC_Os12g34054	mitochondrial ribosomal protein S3, putative, expressed
Chr12	20581650	20581750	+	CDS	0.0102558	LOC_Os12g34054	mitochondrial ribosomal protein S3, putative, expressed
Chr12	20582150	20582200	+	CDS	0.023352	LOC_Os12g34056	mitochondrial 60S ribosomal protein L16, putative, expressed
Chr12	20618450	20618600	+	Intron	0.00907708	LOC_Os12g34094	NADH-ubiquinone oxidoreductase chain 4, putative, expressed
Chr12	20618650	20618700	+	Intron	0.0459865	LOC_Os12g34094	NADH-ubiquinone oxidoreductase chain 4, putative, expressed
Chr12	20618800	20618900	+	Intron	0.0113279	LOC_Os12g34094	NADH-ubiquinone oxidoreductase chain 4, putative, expressed
Chr12	20619200	20619250	+	Intron	0.0180432	LOC_Os12g34094	NADH-ubiquinone oxidoreductase chain 4, putative, expressed
Chr12	20619400	20619450	+	Intron	0.0344394	LOC_Os12g34094	NADH-ubiquinone oxidoreductase chain 4, putative, expressed
Chr12	20619500	20619550	+	Intron	0.0306254	LOC_Os12g34094	NADH-ubiquinone oxidoreductase chain 4, putative, expressed
Chr12	20620850	20620900	+	Intron	0.0379345	LOC_Os12g34094	NADH-ubiquinone oxidoreductase chain 4, putative, expressed
Chr12	20622050	20622150	+	Intron	0.000827146	LOC_Os12g34094	NADH-ubiquinone oxidoreductase chain 4, putative, expressed
Chr12	20622200	20622250	+	Intron	0.0379345	LOC_Os12g34094	NADH-ubiquinone oxidoreductase chain 4, putative, expressed
Chr12	20623550	20623600	+	Intron	0.0273783	LOC_Os12g34094	NADH-ubiquinone oxidoreductase chain 4, putative, expressed
Chr12	20675850	20675900	+	CDS	0.0427623	LOC_Os12g34124	mitochondrial ribosomal protein S3, putative, expressed
Chr12	20676050	20676100	+	Intron	0.0407221	LOC_Os12g34124	mitochondrial ribosomal protein S3, putative, expressed
Chr12	21108150	21108200	+	CDS	0.023352	LOC_Os12g34770	retrotransposon protein, putative, Ty1-copia subclass, expressed
Chr12	23635450	23635500	+	CDS	0.0379345	LOC_Os12g38490	SCARECROW, putative, expressed
Chr12	25055350	25055400	+	CDS	0.023352	LOC_Os12g40490	LIM domain-containing protein, putative, expressed
Chr12	27060300	27060350	+	5'-UTR	0.0499645	LOC_Os12g43600	RNA recognition motif containing protein, expressed
Chr12	27060400	27060450	+	CDS	0	LOC_Os12g43600	RNA recognition motif containing protein, expressed
Chr12	27060550	27060600	+	CDS	0.00326596	LOC_Os12g43600	RNA recognition motif containing protein, expressed
Chr12	27060700	27060850	+	CDS	0.0281485	LOC_Os12g43600	RNA recognition motif containing protein, expressed
Chr2	1116250	1116300	+	CDS	0.00782765	LOC_Os02g02890	peptidyl-prolyl cis-trans isomerase, putative, expressed
Chr2	1621550	1621600	+	CDS	0.023352	LOC_Os02g03840	expressed protein
Chr2	1873500	1873550	+	CDS	0.023352	LOC_Os02g04250	glycosyltransferase, putative, expressed
Chr2	2547300	2547350	+	CDS	0.023352	LOC_Os02g05310	splicing factor 3B subunit 1, putative, expressed
Chr2	4280700	4280750	+	CDS	0.0263865	LOC_Os02g08100	AMP-binding domain containing protein, expressed
Chr2	4543100	4543150	+	5'-UTR	0.00254522	LOC_Os02g08440	WRKY71, expressed
Chr2	4543250	4543300	+	5'-UTR	0.000808064	LOC_Os02g08440	WRKY71, expressed
Chr2	4543500	4543550	+	CDS	0.0440533	LOC_Os02g08440	WRKY71, expressed
Chr2	6569700	6569750	+	Intron	0.0171947	LOC_Os02g12570	pre-mRNA cleavage complex II protein Clp1, putative, expressed
Chr2	10490850	10490900	+	CDS	0.023352	LOC_Os02g18070	NB-ARC domain containing protein, expressed
Chr2	10743750	10743800	+	CDS	0.0379345	LOC_Os02g18450	GTP-binding protein typA/bipA, putative, expressed
Chr2	13966450	13966500	+	CDS	0.023352	LOC_Os02g24100	expressed protein
Chr2	14247750	14247900	+	CDS	0.0138473	LOC_Os02g24586	uncharacterized protein ycf68, putative, expressed
Chr2	15891600	15891650	+	5'-UTR	0.00664462	LOC_Os02g27030	cysteine proteinase 1 precursor, putative, expressed
Chr2	15894650	15894700	+	CDS	0.0440533	LOC_Os02g27030	cysteine proteinase 1 precursor, putative, expressed
Chr2	17580100	17580150	+	CDS	0.00782765	LOC_Os02g29550	AP2 domain containing protein, expressed
Chr2	18236450	18236500	+	CDS	0.023352	LOC_Os02g30630	thiamine pyrophosphate enzyme, C-terminal TPP binding domain containing protein, expressed
Chr2	19594850	19594900	+	CDS	0.023352	LOC_Os02g32970	hydrolase, alpha/beta fold family protein, putative, expressed
Chr2	20013500	20013550	+	3'-UTR	0.023352	LOC_Os02g33610	metallo-beta-lactamase, putative, expressed
Chr2	21060250	21060300	+	3'-UTR	0.00782765	LOC_Os02g35080	T-complex protein 11, putative, expressed
Chr2	23112050	23112100	+	CDS	0.00782765	LOC_Os02g38210	elongation factor Tu, putative, expressed
Chr2	23990650	23990700	+	CDS	0.0458108	LOC_Os02g39710	CCT/B-box zinc finger protein, putative, expressed
Chr2	24001100	24001150	+	CDS	0.023352	LOC_Os02g39740	psaB translation factor, putative, expressed
Chr2	25432100	25432150	+	CDS	0.00782765	LOC_Os02g42290	OsClp3 - Putative Clp protease homologue, expressed
Chr2	26263450	26263500	+	3'-UTR	0.00610598	LOC_Os02g43519	expressed protein
Chr2	27316900	27316950	+	CDS	0.0231063	LOC_Os02g45054	ZOS2-15 - C2H2 zinc finger protein, expressed
Chr2	27840200	27840250	+	CDS	0.023352	LOC_Os02g45750	protein kinase domain containing protein, expressed
Chr2	28702350	28702400	+	CDS	0.023352	LOC_Os02g47020	phosphoribulokinase/Uridine kinase family protein, expressed
Chr2	29757200	29757250	+	Intron	0.00213796	LOC_Os02g48610	mitochondrial import inner membrane translocase subunit Tim17, putative, expressed
Chr2	30382050	30382100	+	5'-UTR	0.0171947	LOC_Os02g49700	homeobox associated leucine zipper, putative, expressed
Chr2	30382850	30382900	+	CDS	0.006052	LOC_Os02g49700	homeobox associated leucine zipper, putative, expressed
Chr2	30383000	30383050	+	CDS	0.0427623	LOC_Os02g49700	homeobox associated leucine zipper, putative, expressed
Chr2	30472250	30472300	+	CDS	0.0379345	LOC_Os02g49870	expressed protein
Chr2	30860500	30860550	+	3'-UTR	0.0379345	LOC_Os02g50540	expressed protein
Chr2	31064200	31064300	+	5'-UTR	0.0155898	LOC_Os02g50840	BAH domain containing protein, putative, expressed
Chr2	31172450	31172500	+	CDS	0.023352	LOC_Os02g50970	protein kinase domain containing protein, expressed
Chr2	31248050	31248100	+	CDS	0.0471983	LOC_Os02g51080	FAD binding domain containing protein, expressed
Chr2	31248300	31248350	+	CDS	0.006052	LOC_Os02g51080	FAD binding domain containing protein, expressed
Chr2	31527300	31527350	+	CDS	0.00762113	LOC_Os02g51470	ATP synthase F1, delta subunit family protein, putative, expressed
Chr2	31649650	31649700	+	CDS	0.0438667	LOC_Os02g51670	ethylene-responsive transcription factor, putative, expressed
Chr2	33619250	33619300	+	CDS	0.023352	LOC_Os02g54890	UDP-glucuronate 4-epimerase, putative, expressed
Chr2	35092600	35092650	+	CDS	0.00462316	LOC_Os02g57280	CBS domain containing membrane protein, putative, expressed
Chr2	35553950	35554000	+	CDS	0.0379345	LOC_Os02g58090	PSP domain containing protein, expressed
Chr2	35558350	35558400	+	CDS	0.023352	LOC_Os02g58090	PSP domain containing protein, expressed
Chr3	718550	718600	+	CDS	0.00254522	LOC_Os03g02160	zinc finger C-x8-C-x5-C-x3-H type family protein, expressed
Chr3	1212350	1212400	+	5'-UTR	0.023352	LOC_Os03g02980	CAMK_CAMK_like_ULKh_APGy.1 - CAMK includes calcium/calmodulin depedent protein kinases, expressed
Chr3	1318250	1318300	+	5'-UTR	0.00782765	LOC_Os03g03130	ubiquitin-conjugating enzyme, putative, expressed
Chr3	1664050	1664100	+	CDS	0.023352	LOC_Os03g03720	glyceraldehyde-3-phosphate dehydrogenase, putative, expressed
Chr3	1664550	1664600	+	CDS	0.0440533	LOC_Os03g03720	glyceraldehyde-3-phosphate dehydrogenase, putative, expressed
Chr3	1664750	1664800	+	CDS	0.0184649	LOC_Os03g03720	glyceraldehyde-3-phosphate dehydrogenase, putative, expressed
Chr3	1664900	1664950	+	CDS	0.0458108	LOC_Os03g03720	glyceraldehyde-3-phosphate dehydrogenase, putative, expressed
Chr3	1665200	1665250	+	3'-UTR	0.0407221	LOC_Os03g03720	glyceraldehyde-3-phosphate dehydrogenase, putative, expressed
Chr3	2144100	2144150	+	Intron	0.0436445	LOC_Os03g04590	ribosomal protein, putative, expressed
Chr3	4096500	4096550	+	CDS	0.023352	LOC_Os03g08010	elongation factor Tu, putative, expressed
Chr3	4270750	4270800	+	CDS	0.00782765	LOC_Os03g08360	3-ketoacyl-CoA synthase 10, putative, expressed
Chr3	4661350	4661400	+	CDS	0.0379345	LOC_Os03g08970	expressed protein
Chr3	4924400	4924450	+	CDS	0.0379345	LOC_Os03g09900	membrane protein, putative, expressed
Chr3	5422900	5422950	+	CDS	0.0445564	LOC_Os03g10620	hydrolase, alpha/beta fold family domain containing protein, expressed
Chr3	5423000	5423050	+	CDS	0.03016	LOC_Os03g10620	hydrolase, alpha/beta fold family domain containing protein, expressed
Chr3	5423100	5423150	+	CDS	0.00706622	LOC_Os03g10620	hydrolase, alpha/beta fold family domain containing protein, expressed
Chr3	5423350	5423400	+	CDS	0.0386	LOC_Os03g10620	hydrolase, alpha/beta fold family domain containing protein, expressed
Chr3	5425200	5425250	+	Intron	0.0171947	LOC_Os03g10620	hydrolase, alpha/beta fold family domain containing protein, expressed
Chr3	5913250	5913300	+	CDS	0.0171947	LOC_Os03g11460	expressed protein
Chr3	6754300	6754350	+	5'-UTR	0.0171947	LOC_Os03g12670	expressed protein
Chr3	6754450	6754550	+	5'-UTR	0.0272898	LOC_Os03g12670	expressed protein
Chr3	6754650	6754700	+	5'-UTR	0.00715246	LOC_Os03g12670	expressed protein
Chr3	6948950	6949000	+	CDS	0.0379345	LOC_Os03g12890	aminotransferase domain containing protein, putative, expressed
Chr3	6949450	6949500	+	CDS	0.0379345	LOC_Os03g12890	aminotransferase domain containing protein, putative, expressed
Chr3	8504000	8504050	+	CDS	0.0379345	LOC_Os03g15480	heat shock protein DnaJ, putative, expressed
Chr3	8504100	8504150	+	CDS	0.0379345	LOC_Os03g15480	heat shock protein DnaJ, putative, expressed
Chr3	8782750	8782800	+	CDS	0.023352	LOC_Os03g15900	SH3 domain containing protein, expressed
Chr3	9248750	9248800	+	CDS	0.0263865	LOC_Os03g16700	initiator-binding protein, putative, expressed
Chr3	9403200	9403250	+	5'-UTR	0.023352	LOC_Os03g16910	SLT1 protein, putative, expressed
Chr3	9404150	9404200	+	CDS	0.023352	LOC_Os03g16910	SLT1 protein, putative, expressed
Chr3	9872550	9872600	+	CDS	0.0171947	LOC_Os03g17740	transporter, putative, expressed
Chr3	10120600	10120650	+	3'-UTR	0.0458108	LOC_Os03g18120	proteins of unknown function domain containing protein, expressed
Chr3	11373850	11373900	+	CDS	0.00782765	LOC_Os03g20140	transposon protein, putative, CACTA, En/Spm sub-class, expressed
Chr3	11523700	11523750	+	CDS	0.023352	LOC_Os03g20370	OsCam1-1 - Calmodulin, expressed
Chr3	11712400	11712450	+	5'-UTR	0.0440533	LOC_Os03g20700	magnesium-chelatase, putative, expressed
Chr3	11712850	11712900	+	CDS	0.0459865	LOC_Os03g20700	magnesium-chelatase, putative, expressed
Chr3	11713000	11713050	+	CDS	0.0379345	LOC_Os03g20700	magnesium-chelatase, putative, expressed
Chr3	11713500	11713550	+	CDS	0.0100928	LOC_Os03g20700	magnesium-chelatase, putative, expressed
Chr3	11715200	11715250	+	CDS	0.0379345	LOC_Os03g20700	magnesium-chelatase, putative, expressed
Chr3	11718950	11719000	+	3'-UTR	0.023352	LOC_Os03g20700	magnesium-chelatase, putative, expressed
Chr3	11771700	11771750	+	CDS	0.0379345	LOC_Os03g20780	ethylene-insensitive 3, putative, expressed
Chr3	11772000	11772150	+	CDS	0.00592916	LOC_Os03g20780	ethylene-insensitive 3, putative, expressed
Chr3	13283250	13283300	+	5'-UTR	0.0171947	LOC_Os03g23010	expressed protein
Chr3	13283400	13283450	+	5'-UTR	0.00782765	LOC_Os03g23010	expressed protein
Chr3	13283500	13283550	+	5'-UTR	0.000690321	LOC_Os03g23010	expressed protein
Chr3	13283700	13283750	+	CDS	0.0113594	LOC_Os03g23010	expressed protein
Chr3	13283950	13284050	+	3'-UTR	0.0409939	LOC_Os03g23010	expressed protein
Chr3	14034650	14034700	+	Intron	1.19084e-09	LOC_Os03g24640	terpene synthase, putative, expressed
Chr3	15470050	15470100	+	CDS	0.0458108	LOC_Os03g27019	expressed protein
Chr3	15604450	15604500	+	CDS	0.0171947	LOC_Os03g27230	phospho-2-dehydro-3-deoxyheptonate aldolase, chloroplast precursor, putative, expressed
Chr3	16136500	16136550	+	CDS	0.00782765	LOC_Os03g28080	ring-H2 zinc finger protein, putative, expressed
Chr3	16209300	16209350	+	CDS	0.00254522	LOC_Os03g28160	jacalin-like lectin domain containing protein, expressed
Chr3	17674250	17674300	+	5'-UTR	0.0379345	LOC_Os03g31026	retrotransposon protein, putative, unclassified, expressed
Chr3	18027000	18027050	+	CDS	0.023352	LOC_Os03g31594	jmjC domain containing protein, expressed
Chr3	18036950	18037000	+	CDS	0.023352	LOC_Os03g31594	jmjC domain containing protein, expressed
Chr3	22000050	22000150	+	5'-UTR	0.0178699	LOC_Os03g39610	chlorophyll A-B binding protein, putative, expressed
Chr3	22000200	22000250	+	5'-UTR	0.0288789	LOC_Os03g39610	chlorophyll A-B binding protein, putative, expressed
Chr3	22000300	22000350	+	5'-UTR	0.00761564	LOC_Os03g39610	chlorophyll A-B binding protein, putative, expressed
Chr3	22000650	22000700	+	CDS	0.0345874	LOC_Os03g39610	chlorophyll A-B binding protein, putative, expressed
Chr3	22000800	22000900	+	CDS	9.36128e-06	LOC_Os03g39610	chlorophyll A-B binding protein, putative, expressed
Chr3	23659450	23659500	+	Intron	0.0231063	LOC_Os03g42530	retrotransposon, putative, centromere-specific, expressed
Chr3	23659550	23659600	+	Intron	0.0188956	LOC_Os03g42530	retrotransposon, putative, centromere-specific, expressed
Chr3	26460500	26460700	+	CDS	0.0231551	LOC_Os03g46770	RNA recognition motif containing protein, expressed
Chr3	29473550	29473600	+	CDS	0.023352	LOC_Os03g51520	fip1 motif family protein, expressed
Chr3	29536250	29536300	+	CDS	0.0379345	LOC_Os03g51610	Inositol 1, 3, 4-trisphosphate 5/6-kinase, putative, expressed
Chr3	29950650	29950700	+	3'-UTR	0.0458108	LOC_Os03g52160	regulatory protein, putative, expressed
Chr3	29950850	29950900	+	3'-UTR	0.0279704	LOC_Os03g52160	regulatory protein, putative, expressed
Chr3	30406850	30406900	+	5'-UTR	0.00782765	LOC_Os03g53020	helix-loop-helix DNA-binding domain containing protein, expressed
Chr3	30778500	30778550	+	CDS	0.023352	LOC_Os03g53670	YT521-B-like family domain containing protein, expressed
Chr3	30778650	30778700	+	CDS	0.023352	LOC_Os03g53670	YT521-B-like family domain containing protein, expressed
Chr3	30886300	30886350	+	CDS	0.023352	LOC_Os03g53860	periplasmic beta-glucosidase precursor, putative, expressed
Chr3	31203750	31203800	+	5'-UTR	0.0440533	LOC_Os03g54890	ribosomal protein L13, putative, expressed
Chr3	31283550	31283600	+	Intron	0.023352	LOC_Os03g55010	UDP-glucoronosyl and UDP-glucosyl transferase domain containing protein, expressed
Chr3	31284250	31284300	+	CDS	0.0379345	LOC_Os03g55010	UDP-glucoronosyl and UDP-glucosyl transferase domain containing protein, expressed
Chr3	31316950	31317000	+	CDS	0.023352	LOC_Os03g55070	UDP-glucose 6-dehydrogenase, putative, expressed
Chr3	31644200	31644250	+	5'-UTR	0.0283433	LOC_Os03g55590	MYB family transcription factor, putative, expressed
Chr3	31644350	31644400	+	5'-UTR	0.00664462	LOC_Os03g55590	MYB family transcription factor, putative, expressed
Chr3	31644750	31644800	+	CDS	0.023352	LOC_Os03g55590	MYB family transcription factor, putative, expressed
Chr3	31720000	31720050	+	CDS	0.023352	LOC_Os03g55704	expressed protein
Chr3	31725200	31725250	+	5'-UTR	0.0283433	LOC_Os03g55720	cytochrome b6f complex subunit, putative, expressed
Chr3	32433300	32433350	+	CDS	0.023352	LOC_Os03g56950	phytochrome-interacting factor 4, putative, expressed
Chr3	32631250	32631300	+	CDS	0.0121644	LOC_Os03g57220	hydroxyacid oxidase 1, putative, expressed
Chr3	32631400	32631450	+	CDS	0.00437747	LOC_Os03g57220	hydroxyacid oxidase 1, putative, expressed
Chr3	32632150	32632200	+	3'-UTR	0.0379345	LOC_Os03g57220	hydroxyacid oxidase 1, putative, expressed
Chr3	33638650	33638700	+	5'-UTR	0.00848976	LOC_Os03g59090	retrotransposon protein, putative, unclassified, expressed
Chr3	33639050	33639100	+	CDS	0.0459865	LOC_Os03g59090	retrotransposon protein, putative, unclassified, expressed
Chr3	35086850	35086900	+	CDS	0.023352	LOC_Os03g61890	chloroplast protein import component Toc159, putative, expressed
Chr3	36133950	36134000	+	CDS	0.0083506	LOC_Os03g63950	plastid-specific 30S ribosomal protein 1, chloroplast precursor, putative, expressed
Chr3	36134200	36134250	+	3'-UTR	0.0284893	LOC_Os03g63950	plastid-specific 30S ribosomal protein 1, chloroplast precursor, putative, expressed
Chr4	9094200	9094250	+	5'-UTR	0	LOC_Os04g16722	uncharacterized protein ycf68, putative, expressed
Chr4	9094350	9094500	+	5'-UTR	1.89806e-08	LOC_Os04g16722	uncharacterized protein ycf68, putative, expressed
Chr4	9094600	9094650	+	5'-UTR	3.70304e-07	LOC_Os04g16722	uncharacterized protein ycf68, putative, expressed
Chr4	9094700	9094750	+	5'-UTR	0.00303774	LOC_Os04g16722	uncharacterized protein ycf68, putative, expressed
Chr4	9094800	9094850	+	5'-UTR	0.00421874	LOC_Os04g16722	uncharacterized protein ycf68, putative, expressed
Chr4	9094950	9095000	+	5'-UTR	0	LOC_Os04g16722	uncharacterized protein ycf68, putative, expressed
Chr4	9095050	9095250	+	5'-UTR	0.0114647	LOC_Os04g16722	uncharacterized protein ycf68, putative, expressed
Chr4	9095350	9095400	+	5'-UTR	3.45596e-06	LOC_Os04g16722	uncharacterized protein ycf68, putative, expressed
Chr4	9095450	9095500	+	5'-UTR	0	LOC_Os04g16722	uncharacterized protein ycf68, putative, expressed
Chr4	9095950	9096100	+	5'-UTR	0.000275258	LOC_Os04g16722	uncharacterized protein ycf68, putative, expressed
Chr4	9096150	9096400	+	CDS	0.0117592	LOC_Os04g16722	uncharacterized protein ycf68, putative, expressed
Chr4	9096450	9096500	+	CDS	0.00782765	LOC_Os04g16722	uncharacterized protein ycf68, putative, expressed
Chr4	9096550	9096600	+	3'-UTR	0.0269785	LOC_Os04g16722	uncharacterized protein ycf68, putative, expressed
Chr4	9096700	9096900	+	3'-UTR	0.00585127	LOC_Os04g16722	uncharacterized protein ycf68, putative, expressed
Chr4	9096950	9097050	+	3'-UTR	0.00111527	LOC_Os04g16722	uncharacterized protein ycf68, putative, expressed
Chr4	9097150	9097200	+	3'-UTR	2.59558e-06	LOC_Os04g16722	uncharacterized protein ycf68, putative, expressed
Chr4	9097300	9097350	+	3'-UTR	0.00249527	LOC_Os04g16722	uncharacterized protein ycf68, putative, expressed
Chr4	9097400	9097450	+	3'-UTR	0	LOC_Os04g16722	uncharacterized protein ycf68, putative, expressed
Chr4	9097500	9097550	+	3'-UTR	0	LOC_Os04g16722	uncharacterized protein ycf68, putative, expressed
Chr4	9097750	9097850	+	3'-UTR	0.00032858	LOC_Os04g16722	uncharacterized protein ycf68, putative, expressed
Chr4	9097950	9098050	+	3'-UTR	0.0162771	LOC_Os04g16722	uncharacterized protein ycf68, putative, expressed
Chr4	9098150	9098400	+	3'-UTR	0.00618558	LOC_Os04g16722	uncharacterized protein ycf68, putative, expressed
Chr4	9107100	9107150	+	CDS	0.0129899	LOC_Os04g16734	maturase K, putative, expressed
Chr4	9122250	9122450	+	CDS	0.00677371	LOC_Os04g16748	ATP synthase B chain, putative, expressed
Chr4	9122950	9123050	+	Intron	0.0272664	LOC_Os04g16748	ATP synthase B chain, putative, expressed
Chr4	9123500	9123550	+	CDS	0.00121483	LOC_Os04g16748	ATP synthase B chain, putative, expressed
Chr4	9123600	9123650	+	CDS	0.0326448	LOC_Os04g16740	ATP synthase subunit alpha, putative, expressed
Chr4	9124100	9124150	+	CDS	0.0121644	LOC_Os04g16740	ATP synthase subunit alpha, putative, expressed
Chr4	9136150	9136250	+	5'-UTR	0.015443	LOC_Os04g16770	photosynthetic reaction center protein, putative, expressed
Chr4	9136550	9136600	+	CDS	0.0180432	LOC_Os04g16770	photosynthetic reaction center protein, putative, expressed
Chr4	9136750	9136850	+	CDS	0.00127577	LOC_Os04g16770	photosynthetic reaction center protein, putative, expressed
Chr4	9137100	9137150	+	CDS	0.0205291	LOC_Os04g16770	photosynthetic reaction center protein, putative, expressed
Chr4	9146750	9146800	+	CDS	0.0100928	LOC_Os04g16798	chloroplast 30S ribosomal protein S7, putative, expressed
Chr4	9176400	9176450	+	CDS	0.023352	LOC_Os04g16872	#N/A
Chr4	9178150	9178200	+	CDS	0.023352	LOC_Os04g16874	photosystem II 44 kDa reaction center protein, putative, expressed
Chr4	9993650	9993700	+	CDS	0.0277857	LOC_Os04g18090	histone H1, putative, expressed
Chr4	9994000	9994050	+	CDS	0.0249979	LOC_Os04g18090	histone H1, putative, expressed
Chr4	11242500	11242550	+	3'-UTR	0.023352	LOC_Os04g20164	amine oxidase precursor, putative, expressed
Chr4	11243500	11243550	+	3'-UTR	0.0379345	LOC_Os04g20164	amine oxidase precursor, putative, expressed
Chr4	14927600	14927650	+	CDS	0.023352	LOC_Os04g25740	expressed protein
Chr4	18934500	18934550	+	5'-UTR	0.00762113	LOC_Os04g31620	#N/A
Chr4	18935000	18935050	+	CDS	0.011911	LOC_Os04g31620	#N/A
Chr4	20496450	20496550	+	CDS	0.0249992	LOC_Os04g33830	membrane protein, putative, expressed
Chr4	20496750	20496800	+	CDS	0.0432651	LOC_Os04g33830	membrane protein, putative, expressed
Chr4	21280800	21280850	+	3'-UTR	0.011911	LOC_Os04g35010	helix-loop-helix DNA-binding domain containing protein, expressed
Chr4	21842550	21842600	+	CDS	0.023352	LOC_Os04g35840	T-complex protein 11, putative, expressed
Chr4	21844400	21844450	+	CDS	0.0379345	LOC_Os04g35840	T-complex protein 11, putative, expressed
Chr4	22414500	22414550	+	5'-UTR	0.0263865	LOC_Os04g37690	RNA recognition motif containing protein, putative, expressed
Chr4	22482450	22482500	+	CDS	0.023352	LOC_Os04g37820	cytokinin-O-glucosyltransferase 2, putative, expressed
Chr4	22937550	22937600	+	CDS	0.0345874	LOC_Os04g38600	glyceraldehyde-3-phosphate dehydrogenase, putative, expressed
Chr4	24466450	24466500	+	CDS	0.00782765	LOC_Os04g41229	helix-loop-helix DNA-binding domain containing protein, expressed
Chr4	24916450	24916500	+	5'-UTR	0.0440533	LOC_Os04g42090	CPuORF7 - conserved peptide uORF-containing transcript, expressed
Chr4	26399300	26399350	+	CDS	0.0379345	LOC_Os04g44610	white-brown complex homolog protein 11, putative, expressed
Chr4	27508650	27508700	+	CDS	0.0171947	LOC_Os04g46390	chaperone protein dnaJ, putative, expressed
Chr4	27508800	27508850	+	CDS	0.0459865	LOC_Os04g46390	chaperone protein dnaJ, putative, expressed
Chr4	28047350	28047400	+	CDS	0.00782765	LOC_Os04g47220	aquaporin protein, putative, expressed
Chr4	29531800	29531850	+	CDS	0.0440533	LOC_Os04g49510	CAMK_CAMK_like.27 - CAMK includes calcium/calmodulin depedent protein kinases, expressed
Chr4	29531950	29532000	+	CDS	0.00254522	LOC_Os04g49510	CAMK_CAMK_like.27 - CAMK includes calcium/calmodulin depedent protein kinases, expressed
Chr4	29967500	29967550	+	CDS	0.023352	LOC_Os04g50204	protein transport protein-related, putative, expressed
Chr4	31701200	31701250	+	CDS	0.0263865	LOC_Os04g53230	aminomethyltransferase, putative, expressed
Chr4	31701300	31701350	+	CDS	0.006052	LOC_Os04g53230	aminomethyltransferase, putative, expressed
Chr4	32450800	32450850	+	5'-UTR	0.023352	LOC_Os04g54564	expressed protein
Chr4	32844650	32844700	+	CDS	0.0231063	LOC_Os04g55230	tetratricopeptide repeat domain containing protein, putative, expressed
Chr4	32845300	32845350	+	CDS	0.0459865	LOC_Os04g55230	tetratricopeptide repeat domain containing protein, putative, expressed
Chr4	32845550	32845600	+	CDS	0.0440533	LOC_Os04g55230	tetratricopeptide repeat domain containing protein, putative, expressed
Chr4	33531000	33531050	+	CDS	0.0379345	LOC_Os04g56240	lipase, putative, expressed
Chr4	33763050	33763100	+	Intron	0.00892522	LOC_Os04g56620	molybdopterin biosynthesis protein CNX1, putative, expressed
Chr4	34663500	34663550	+	5'-UTR	0.00762113	LOC_Os04g58200	protochlorophyllide reductase A, chloroplast precursor, putative, expressed
Chr4	34958900	34958950	+	5'-UTR	0.0379345	LOC_Os04g58780	pentatricopeptide repeat protein, putative, expressed
Chr4	34959250	34959300	+	5'-UTR	0.023352	LOC_Os04g58780	pentatricopeptide repeat protein, putative, expressed
Chr4	34980750	34980800	+	CDS	0.023352	LOC_Os04g58810	CAF1 family ribonuclease containing protein, putative, expressed
Chr4	35337850	35337900	+	CDS	0.023352	LOC_Os04g59440	chlorophyll A-B binding protein, putative, expressed
Chr4	35400100	35400150	+	CDS	0.00782765	LOC_Os04g59520	anthranilate phosphoribosyltransferase, putative, expressed
Chr5	185850	185900	+	CDS	0.0440533	LOC_Os05g01270	peptidyl-prolyl cis-trans isomerase, putative, expressed
Chr5	538750	538800	+	CDS	0.00782765	LOC_Os05g01940	zinc finger, RING-type, putative, expressed
Chr5	801300	801350	+	5'-UTR	0.023352	LOC_Os05g02420	expressed protein
Chr5	801400	801450	+	5'-UTR	0.0277857	LOC_Os05g02420	expressed protein
Chr5	1662350	1662400	+	CDS	0.00745575	LOC_Os05g03760	zinc finger family protein, putative, expressed
Chr5	1662500	1662550	+	CDS	0.0171947	LOC_Os05g03760	zinc finger family protein, putative, expressed
Chr5	1662650	1662700	+	CDS	0.0187416	LOC_Os05g03760	zinc finger family protein, putative, expressed
Chr5	1663050	1663100	+	CDS	0.0459865	LOC_Os05g03760	zinc finger family protein, putative, expressed
Chr5	1663350	1663400	+	CDS	0.0277857	LOC_Os05g03760	zinc finger family protein, putative, expressed
Chr5	1718150	1718200	+	5'-UTR	0.0263865	LOC_Os05g03860	CPuORF3 - conserved peptide uORF-containing transcript, expressed
Chr5	1718250	1718350	+	5'-UTR	0.0176037	LOC_Os05g03860	CPuORF3 - conserved peptide uORF-containing transcript, expressed
Chr5	2089050	2089100	+	5'-UTR	0.023352	LOC_Os05g04510	S-adenosylmethionine synthetase, putative, expressed
Chr5	2091500	2091550	+	CDS	0.0440533	LOC_Os05g04510	S-adenosylmethionine synthetase, putative, expressed
Chr5	2884200	2884250	+	3'-UTR	0.023352	LOC_Os05g05780	chromatin-remodeling complex ATPase chain, putative, expressed
Chr5	3763550	3763600	+	CDS	0.0231063	LOC_Os05g07130	6PF-2-K/Fru-2,6-P2ASE liver isozyme, putative, expressed
Chr5	3764150	3764200	+	CDS	0.0284893	LOC_Os05g07130	6PF-2-K/Fru-2,6-P2ASE liver isozyme, putative, expressed
Chr5	3769300	3769350	+	CDS	0.023352	LOC_Os05g07130	6PF-2-K/Fru-2,6-P2ASE liver isozyme, putative, expressed
Chr5	3770600	3770650	+	CDS	0.0459865	LOC_Os05g07130	6PF-2-K/Fru-2,6-P2ASE liver isozyme, putative, expressed
Chr5	3770800	3770850	+	CDS	0.023352	LOC_Os05g07130	6PF-2-K/Fru-2,6-P2ASE liver isozyme, putative, expressed
Chr5	5120350	5120400	+	Intron	0.0379345	LOC_Os05g09160	expressed protein
Chr5	13779800	13779850	+	CDS	0.0379345	LOC_Os05g23940	transcription initiation factor IIB, putative, expressed
Chr5	13781000	13781050	+	CDS	0.0379345	LOC_Os05g23940	transcription initiation factor IIB, putative, expressed
Chr5	16150400	16150450	+	CDS	0.00254522	LOC_Os05g27730	WRKY53, expressed
Chr5	16151300	16151350	+	CDS	0.00768438	LOC_Os05g27730	WRKY53, expressed
Chr5	16151600	16151650	+	CDS	0.0471983	LOC_Os05g27730	WRKY53, expressed
Chr5	16152050	16152100	+	CDS	0.0263865	LOC_Os05g27730	WRKY53, expressed
Chr5	16152350	16152400	+	3'-UTR	0.0458108	LOC_Os05g27730	WRKY53, expressed
Chr5	16860000	16860050	+	CDS	0.0100928	LOC_Os05g28740	universal stress protein domain containing protein, putative, expressed
Chr5	17135450	17135500	+	CDS	0.023352	LOC_Os05g29170	expressed protein
Chr5	19413400	19413450	+	3'-UTR	0.023352	LOC_Os05g33100	endo-1,3;1,4-beta-D-glucanase precursor, putative, expressed
Chr5	19870150	19870200	+	CDS	0.00254522	LOC_Os05g33730	gibberellin receptor GID1L2, putative, expressed
Chr5	20130150	20130200	+	CDS	0.0440533	LOC_Os05g34070	DIP1, putative, expressed
Chr5	20974100	20974150	+	CDS	0.0379345	LOC_Os05g35330	ribulose bisphosphate carboxylase large chain precursor, putative, expressed
Chr5	21526400	21526450	+	CDS	0.023352	LOC_Os05g36360	U-box domain containing protein, expressed
Chr5	22062400	22062450	+	CDS	0.023352	LOC_Os05g37690	OsFBL23 - F-box domain and LRR containing protein, expressed
Chr5	23598800	23598850	+	CDS	0.023352	LOC_Os05g40180	serine/threonine-protein kinase stt7, chloroplast precursor, putative, expressed
Chr5	23600550	23600600	+	CDS	0.0379345	LOC_Os05g40180	serine/threonine-protein kinase stt7, chloroplast precursor, putative, expressed
Chr5	24539450	24539500	+	3'-UTR	0.000808064	LOC_Os05g41900	translation initiation factor SUI1, putative, expressed
Chr5	25011200	25011250	+	CDS	0.023352	LOC_Os05g43060	retrotransposon, putative, centromere-specific, expressed
Chr5	25185300	25185350	+	CDS	0.023352	LOC_Os05g43280	MATH domain containing protein, expressed
Chr5	26464350	26464400	+	5'-UTR	0.023352	LOC_Os05g45660	plasminogen activator inhibitor 1 RNA-binding protein, putative, expressed
Chr5	27878950	27879050	+	CDS	0.0371559	LOC_Os05g48630	expressed protein
Chr5	27879150	27879200	+	CDS	0.0471983	LOC_Os05g48630	expressed protein
Chr5	27879350	27879400	+	3'-UTR	0.0440533	LOC_Os05g48630	expressed protein
Chr5	28082000	28082050	+	CDS	0.0379345	LOC_Os05g48960	splicing factor U2AF, putative, expressed
Chr6	523250	523300	+	CDS	0.0171947	LOC_Os06g01934	homeobox domain containing protein, expressed
Chr6	580850	580900	+	CDS	0.00782765	LOC_Os06g02019	cytochrome P450, putative, expressed
Chr6	891850	891900	+	3'-UTR	0.023352	LOC_Os06g02550	CPuORF21 - conserved peptide uORF-containing transcript, expressed
Chr6	923500	923550	+	Intron	0.0279662	LOC_Os06g02600	#N/A
Chr6	1784450	1784500	+	CDS	0.0149316	LOC_Os06g04230	expressed protein
Chr6	3828200	3828250	+	CDS	0.0379345	LOC_Os06g07869	cytochrome b-c1 complex subunit 8, putative, expressed
Chr6	7230650	7230700	+	3'-UTR	0.0459865	LOC_Os06g13190	expressed protein
Chr6	11281400	11281450	+	CDS	0.023352	LOC_Os06g19730	HEAT repeat family protein, putative, expressed
Chr6	11560200	11560250	+	CDS	0.0171947	LOC_Os06g20150	peroxidase precursor, putative, expressed
Chr6	12452700	12452750	+	5'-UTR	0.0273783	LOC_Os06g21590	chlorophyll A-B binding protein, putative, expressed
Chr6	12452950	12453000	+	CDS	0.00932922	LOC_Os06g21590	chlorophyll A-B binding protein, putative, expressed
Chr6	12453050	12453150	+	CDS	0.0139616	LOC_Os06g21590	chlorophyll A-B binding protein, putative, expressed
Chr6	12453250	12453300	+	CDS	0.00396297	LOC_Os06g21590	chlorophyll A-B binding protein, putative, expressed
Chr6	12453350	12453400	+	CDS	0.0155187	LOC_Os06g21590	chlorophyll A-B binding protein, putative, expressed
Chr6	12453450	12453500	+	CDS	0.0218302	LOC_Os06g21590	chlorophyll A-B binding protein, putative, expressed
Chr6	12453550	12453600	+	CDS	0.00782765	LOC_Os06g21590	chlorophyll A-B binding protein, putative, expressed
Chr6	12453650	12453750	+	3'-UTR	0.013667	LOC_Os06g21590	chlorophyll A-B binding protein, putative, expressed
Chr6	13946800	13946900	+	5'-UTR	0.0220301	LOC_Os06g23870	acyl-CoA dehydrogenase domain protein, putative, expressed
Chr6	13947100	13947200	+	5'-UTR	0.04396	LOC_Os06g23870	acyl-CoA dehydrogenase domain protein, putative, expressed
Chr6	13948600	13948650	+	5'-UTR	0.0171947	LOC_Os06g23870	acyl-CoA dehydrogenase domain protein, putative, expressed
Chr6	14078600	14078650	+	CDS	0.023352	LOC_Os06g24070	myb-like DNA-binding domain containing protein, expressed
Chr6	21373400	21373450	+	CDS	0.0440533	LOC_Os06g36390	expressed protein
Chr6	21480350	21480450	+	CDS	0.0306433	LOC_Os06g36560	inositol oxygenase, putative, expressed
Chr6	21481650	21481700	+	CDS	0.023352	LOC_Os06g36560	inositol oxygenase, putative, expressed
Chr6	22616750	22616800	+	5'-UTR	0.006052	LOC_Os06g38210	expressed protein
Chr6	23367750	23367800	+	CDS	0.0180588	LOC_Os06g39370	OsFBK16 - F-box domain and kelch repeat containing protein, expressed
Chr6	23575200	23575250	+	3'-UTR	0.0459865	LOC_Os06g39712	OsClp10 - Putative Clp protease homologue, expressed
Chr6	23737150	23737200	+	CDS	0.0445564	LOC_Os06g39912	expressed protein
Chr6	24228450	24228500	+	CDS	0.0284893	LOC_Os06g40640	fructose-bisphospate aldolase isozyme, putative, expressed
Chr6	26277500	26277550	+	CDS	0.00331695	LOC_Os06g43660	inorganic H+ pyrophosphatase, putative, expressed
Chr6	26277650	26277700	+	CDS	0.0379345	LOC_Os06g43660	inorganic H+ pyrophosphatase, putative, expressed
Chr6	27414600	27414650	+	CDS	0.023352	LOC_Os06g45350	protein kinase domain containing protein, expressed
Chr6	28403750	28403800	+	CDS	0.00782765	LOC_Os06g46770	ubiquitin family protein, putative, expressed
Chr6	29342650	29342750	+	CDS	0.0332297	LOC_Os06g48500	expressed protein
Chr6	29630650	29630700	+	CDS	0.023352	LOC_Os06g48940	GHMP kinases ATP-binding protein, putative, expressed
Chr6	29630950	29631000	+	CDS	0.023352	LOC_Os06g48940	GHMP kinases ATP-binding protein, putative, expressed
Chr6	30418000	30418100	+	CDS	0.0102016	LOC_Os06g50230	expressed protein
Chr6	30993350	30993400	+	5'-UTR	0.011911	LOC_Os06g51220	HMG1/2, putative, expressed
Chr6	30993500	30993550	+	5'-UTR	0.0288789	LOC_Os06g51220	HMG1/2, putative, expressed
Chr6	30994400	30994500	+	CDS	0.026716	LOC_Os06g51220	HMG1/2, putative, expressed
Chr6	30994800	30994850	+	3'-UTR	0.0121644	LOC_Os06g51220	HMG1/2, putative, expressed
Chr7	2546750	2546800	+	CDS	0.0155187	LOC_Os07g05480	photosystem I reaction center subunit, chloroplast precursor, putative, expressed
Chr7	2546900	2546950	+	CDS	0.00183613	LOC_Os07g05480	photosystem I reaction center subunit, chloroplast precursor, putative, expressed
Chr7	2800850	2800900	+	CDS	0.00782765	LOC_Os07g05820	hydroxyacid oxidase 1, putative, expressed
Chr7	3760150	3760200	+	CDS	0.023352	LOC_Os07g07540	SHOOT1 protein, putative, expressed
Chr7	3760800	3760850	+	CDS	0.023352	LOC_Os07g07540	SHOOT1 protein, putative, expressed
Chr7	3761000	3761050	+	CDS	0.00331695	LOC_Os07g07540	SHOOT1 protein, putative, expressed
Chr7	4740850	4740900	+	3'-UTR	0.023352	LOC_Os07g09060	aldehyde dehydrogenase, putative, expressed
Chr7	6134900	6134950	+	CDS	0.0231063	LOC_Os07g11110	NAD dependent epimerase/dehydratase family protein, putative, expressed
Chr7	6135600	6135650	+	CDS	0.0379345	LOC_Os07g11110	NAD dependent epimerase/dehydratase family protein, putative, expressed
Chr7	7717850	7717900	+	CDS	0.0459865	LOC_Os07g13460	expressed protein
Chr7	13592900	13592950	+	CDS	0.00782765	LOC_Os07g23990	tetratricopeptide repeat domain containing protein, putative, expressed
Chr7	13602450	13602500	+	3'-UTR	0.0440533	LOC_Os07g23990	tetratricopeptide repeat domain containing protein, putative, expressed
Chr7	14238400	14238450	+	CDS	0.0175672	LOC_Os07g25004	NADPH-dependent oxidoreductase, putative, expressed
Chr7	14239150	14239200	+	CDS	0.0218302	LOC_Os07g25004	NADPH-dependent oxidoreductase, putative, expressed
Chr7	14533400	14533500	+	CDS	0.0306407	LOC_Os07g25430	photosystem I reaction center subunit IV A, chloroplast precursor, putative, expressed
Chr7	17269000	17269050	+	CDS	0.023352	LOC_Os07g29410	thioredoxin, putative, expressed
Chr7	17269300	17269350	+	CDS	0.023352	LOC_Os07g29410	thioredoxin, putative, expressed
Chr7	20724850	20724900	+	CDS	0.023352	LOC_Os07g34570	FAD dependent oxidoreductase domain containing protein, expressed
Chr7	20725450	20725550	+	CDS	0.0125112	LOC_Os07g34570	FAD dependent oxidoreductase domain containing protein, expressed
Chr7	21575050	21575100	+	CDS	0.0279704	LOC_Os07g36080	oxygen evolving enhancer protein 3 domain containing protein, expressed
Chr7	22115200	22115250	+	5'-UTR	0.0379345	LOC_Os07g36940	eukaryotic translation initiation factor 4G, putative, expressed
Chr7	22186050	22186100	+	CDS	0.0369662	LOC_Os07g37030	cytochrome b6-f complex iron-sulfur subunit, chloroplast precursor, putative, expressed
Chr7	22488050	22488100	+	CDS	0.0345874	LOC_Os07g37550	chlorophyll A-B binding protein, putative, expressed
Chr7	22488150	22488200	+	CDS	0.00437747	LOC_Os07g37550	chlorophyll A-B binding protein, putative, expressed
Chr7	22488250	22488400	+	CDS	0.0124149	LOC_Os07g37550	chlorophyll A-B binding protein, putative, expressed
Chr7	23300150	23300200	+	CDS	0.00782765	LOC_Os07g38840	expressed protein
Chr7	23358000	23358050	+	CDS	0.0432651	LOC_Os07g38960	chlorophyll A-B binding protein, putative, expressed
Chr7	23358100	23358150	+	CDS	0.034818	LOC_Os07g38960	chlorophyll A-B binding protein, putative, expressed
Chr7	23358250	23358300	+	CDS	0.033063	LOC_Os07g38960	chlorophyll A-B binding protein, putative, expressed
Chr7	23358400	23358450	+	CDS	0.0401596	LOC_Os07g38960	chlorophyll A-B binding protein, putative, expressed
Chr7	23358500	23358550	+	CDS	0.0264883	LOC_Os07g38960	chlorophyll A-B binding protein, putative, expressed
Chr7	23358650	23358700	+	CDS	0.0237147	LOC_Os07g38960	chlorophyll A-B binding protein, putative, expressed
Chr7	23722950	23723000	+	CDS	0.023352	LOC_Os07g39590	spotted leaf 11, putative, expressed
Chr7	24985600	24985700	+	CDS	0.0253048	LOC_Os07g41694	acidic leucine-rich nuclear phosphoprotein 32-related protein 1, putative, expressed
Chr7	24988000	24988050	+	3'-UTR	0.0379345	LOC_Os07g41694	acidic leucine-rich nuclear phosphoprotein 32-related protein 1, putative, expressed
Chr7	27942300	27942350	+	CDS	0.023352	LOC_Os07g46750	elongation factor protein, putative, expressed
Chr7	28434550	28434600	+	CDS	0.023352	LOC_Os07g47530	AAA-type ATPase family protein, putative, expressed
Chr7	28434900	28434950	+	CDS	0.023352	LOC_Os07g47530	AAA-type ATPase family protein, putative, expressed
Chr7	28986000	28986050	+	5'-UTR	0.0440533	LOC_Os07g48450	no apical meristem protein, putative, expressed
Chr7	28987100	28987150	+	CDS	0.023352	LOC_Os07g48450	no apical meristem protein, putative, expressed
Chr7	29112850	29112900	+	5'-UTR	0.0427623	LOC_Os07g48620	expressed protein
Chr7	29626750	29626800	+	CDS	0.023352	LOC_Os07g49460	response regulator receiver domain containing protein, expressed
Chr8	1675050	1675100	+	5'-UTR	0.0231063	LOC_Os08g03579	expressed protein
Chr8	1676350	1676400	+	5'-UTR	0.0459865	LOC_Os08g03579	expressed protein
Chr8	2031000	2031050	+	CDS	0.023352	LOC_Os08g04180	tryptophan synthase beta chain 1, putative, expressed
Chr8	4354550	4354600	+	Intron	0.023352	LOC_Os08g07774	disease resistance protein RPM1, putative, expressed
Chr8	4686650	4686700	+	CDS	0.0379345	LOC_Os08g08205	expressed protein
Chr8	5951600	5951650	+	5'-UTR	0.0445564	LOC_Os08g10250	SHR5-receptor-like kinase, putative, expressed
Chr8	6016100	6016150	+	CDS	0.0379345	LOC_Os08g10310	SHR5-receptor-like kinase, putative, expressed
Chr8	6038450	6038500	+	CDS	0.0379345	LOC_Os08g10320	SHR5-receptor-like kinase, putative, expressed
Chr8	6730150	6730200	+	5'-UTR	0.023352	LOC_Os08g11470	transposon protein, putative, CACTA, En/Spm sub-class, expressed
Chr8	8969200	8969250	+	3'-UTR	0.023352	LOC_Os08g14880	transposon protein, putative, unclassified, expressed
Chr8	8969700	8969750	+	3'-UTR	0.023352	LOC_Os08g14880	transposon protein, putative, unclassified, expressed
Chr8	9255250	9255300	+	CDS	0.0459865	LOC_Os08g15246	chloroplast 30S ribosomal protein S7, putative, expressed
Chr8	9256700	9256750	+	Intron	0.0499542	LOC_Os08g15248	NADPH-dependent oxidoreductase, putative, expressed
Chr8	10568900	10568950	+	Intron	0.023352	LOC_Os08g17294	PSF3 - Putative GINS complex subunit, expressed
Chr8	10633000	10633050	+	CDS	0.00762113	LOC_Os08g17390	expressed protein
Chr8	12412300	12412350	+	CDS	0.023352	LOC_Os08g20660	sucrose-phosphate synthase, putative, expressed
Chr8	13363700	13363750	+	Intron	0.0171947	LOC_Os08g22149	CBS domain containing membrane protein, putative, expressed
Chr8	17766200	17766250	+	CDS	0.0279704	LOC_Os08g29020	wall-associated kinase-like 2, putative, expressed
Chr8	17766300	17766350	+	CDS	0.023352	LOC_Os08g29020	wall-associated kinase-like 2, putative, expressed
Chr8	17768150	17768200	+	3'-UTR	0.0379345	LOC_Os08g29020	wall-associated kinase-like 2, putative, expressed
Chr8	20848050	20848100	+	5'-UTR	0.0149316	LOC_Os08g33420	agenet domain containing protein, expressed
Chr8	22034850	22034900	+	CDS	0.000601972	LOC_Os08g34984	DUF581 domain containing protein, expressed
Chr8	22324500	22324650	+	CDS	0.00238711	LOC_Os08g35420	photosynthetic reaction center protein, putative, expressed
Chr8	22324850	22324900	+	CDS	0.023352	LOC_Os08g35420	photosynthetic reaction center protein, putative, expressed
Chr8	22325000	22325050	+	CDS	0.0014914	LOC_Os08g35420	photosynthetic reaction center protein, putative, expressed
Chr8	22325150	22325300	+	CDS	0.00911216	LOC_Os08g35420	photosynthetic reaction center protein, putative, expressed
Chr8	22325500	22325550	+	CDS	0.0013304	LOC_Os08g35420	photosynthetic reaction center protein, putative, expressed
Chr8	23037150	23037200	+	CDS	0.023352	LOC_Os08g36480	nitrate reductase, putative, expressed
Chr8	24884200	24884250	+	CDS	0.0440533	LOC_Os08g39370	citrate transporter, putative, expressed
Chr8	24943300	24943350	+	CDS	0.023352	LOC_Os08g39440	RNA recognition motif containing protein, putative, expressed
Chr8	25090100	25090150	+	CDS	0.000808064	LOC_Os08g39630	helix-loop-helix DNA-binding domain containing protein, expressed
Chr8	25091150	25091200	+	CDS	0.0440533	LOC_Os08g39630	helix-loop-helix DNA-binding domain containing protein, expressed
Chr8	25091350	25091400	+	CDS	0.0459865	LOC_Os08g39630	helix-loop-helix DNA-binding domain containing protein, expressed
Chr8	25127400	25127450	+	Intron	0.0364885	LOC_Os08g39694	cytochrome P450, putative, expressed
Chr8	25484450	25484500	+	CDS	0.0379345	LOC_Os08g40260	OsSPL15 - SBP-box gene family member, expressed
Chr8	25485000	25485050	+	CDS	0.023352	LOC_Os08g40260	OsSPL15 - SBP-box gene family member, expressed
Chr8	25485450	25485500	+	CDS	0.0459865	LOC_Os08g40260	OsSPL15 - SBP-box gene family member, expressed
Chr8	25644800	25644850	+	CDS	0.00354983	LOC_Os08g40510	KID-containing protein, putative, expressed
Chr8	26177600	26177650	+	5'-UTR	0.0171947	LOC_Os08g41460	expressed protein
Chr8	26993050	26993100	+	Intron	0.023352	LOC_Os08g42700	resistance protein, putative, expressed
Chr8	27316950	27317000	+	CDS	0.0440533	LOC_Os08g43190	dehydrogenase, putative, expressed
Chr8	28070700	28070750	+	CDS	0.00782765	LOC_Os08g44640	OsSCP41 - Putative Serine Carboxypeptidase homologue, expressed
Chr8	28071400	28071450	+	CDS	0.023352	LOC_Os08g44640	OsSCP41 - Putative Serine Carboxypeptidase homologue, expressed
Chr8	28071900	28071950	+	CDS	0.0379345	LOC_Os08g44640	OsSCP41 - Putative Serine Carboxypeptidase homologue, expressed
Chr8	28072150	28072200	+	CDS	0.023352	LOC_Os08g44640	OsSCP41 - Putative Serine Carboxypeptidase homologue, expressed
Chr8	28370650	28370700	+	CDS	0.023352	LOC_Os08g45180	kinase, pfkB family, putative, expressed
Chr9	3050	3100	+	5'-UTR	0.000123232	LOC_Os09g00999	#N/A
Chr9	3600	3650	+	CDS	0.0249979	LOC_Os09g00999	#N/A
Chr9	3750	3800	+	3'-UTR	0.0325122	LOC_Os09g00999	#N/A
Chr9	3850	3900	+	3'-UTR	0.0339781	LOC_Os09g00999	#N/A
Chr9	4000	4100	+	3'-UTR	0.000628096	LOC_Os09g00999	#N/A
Chr9	4250	4350	+	3'-UTR	3.12587e-05	LOC_Os09g00999	#N/A
Chr9	4400	4450	+	3'-UTR	0.000144982	LOC_Os09g00999	#N/A
Chr9	4600	4650	+	3'-UTR	0.000456017	LOC_Os09g00999	#N/A
Chr9	4750	4950	+	3'-UTR	0.0106487	LOC_Os09g00999	#N/A
Chr9	5050	5100	+	3'-UTR	0.000583239	LOC_Os09g00999	#N/A
Chr9	5300	5350	+	3'-UTR	0	LOC_Os09g00999	#N/A
Chr9	5400	5450	+	3'-UTR	0.0004586	LOC_Os09g00999	#N/A
Chr9	6400	6500	+	5'-UTR	0.00849709	LOC_Os09g01000	#N/A
Chr9	6600	6750	+	5'-UTR	0.00333847	LOC_Os09g01000	#N/A
Chr9	6950	7150	+	5'-UTR	0.0024025	LOC_Os09g01000	#N/A
Chr9	7250	7300	+	5'-UTR	1.46549e-14	LOC_Os09g01000	#N/A
Chr9	7350	7450	+	5'-UTR	0.0101476	LOC_Os09g01000	#N/A
Chr9	7500	7750	+	5'-UTR	0.0032737	LOC_Os09g01000	#N/A
Chr9	7800	7900	+	5'-UTR	0.00610541	LOC_Os09g01000	#N/A
Chr9	8100	8150	+	CDS	4.68978e-05	LOC_Os09g01000	#N/A
Chr9	8200	8300	+	3'-UTR	0.005449	LOC_Os09g01000	#N/A
Chr9	8350	8400	+	3'-UTR	0.00108338	LOC_Os09g01000	#N/A
Chr9	8450	8500	+	3'-UTR	2.95131e-12	LOC_Os09g01000	#N/A
Chr9	8550	8700	+	3'-UTR	7.94269e-07	LOC_Os09g01000	#N/A
Chr9	8750	8850	+	3'-UTR	0.000863033	LOC_Os09g01000	#N/A
Chr9	8900	9100	+	3'-UTR	0.000720015	LOC_Os09g01000	#N/A
Chr9	9200	9300	+	3'-UTR	0.00585372	LOC_Os09g01000	#N/A
Chr9	2496000	2496050	+	CDS	0.0458108	LOC_Os09g04680	photosystem II P680 chlorophyll A apoprotein, putative, expressed
Chr9	3796200	3796250	+	3'-UTR	0.0379345	LOC_Os09g07570	ferredoxin-thioredoxin reductase catalytic chain, chloroplast precursor, putative, expressed
Chr9	4729400	4729450	+	CDS	7.71403e-05	LOC_Os09g08910	ATP synthase, putative, expressed
Chr9	4729650	4729700	+	CDS	0.0149316	LOC_Os09g08910	ATP synthase, putative, expressed
Chr9	4729850	4729950	+	3'-UTR	0.0212788	LOC_Os09g08910	ATP synthase, putative, expressed
Chr9	5599350	5599400	+	CDS	0.0171947	LOC_Os09g10274	expressed protein
Chr9	6016850	6016900	+	CDS	0.0379345	LOC_Os09g10930	gamma response I protein, putative, expressed
Chr9	10130150	10130200	+	CDS	0.023352	LOC_Os09g16510	WRKY74, expressed
Chr9	10845800	10846050	+	5'-UTR	0.01353	LOC_Os09g17740	chlorophyll A-B binding protein, putative, expressed
Chr9	10846200	10846550	+	CDS	0.0104857	LOC_Os09g17740	chlorophyll A-B binding protein, putative, expressed
Chr9	10846600	10846650	+	3'-UTR	2.33343e-05	LOC_Os09g17740	chlorophyll A-B binding protein, putative, expressed
Chr9	12127600	12127650	+	3'-UTR	0.023352	LOC_Os09g20240	DUF581 domain containing protein, expressed
Chr9	12217600	12217650	+	CDS	0.0499542	LOC_Os09g20350	ethylene-responsive transcription factor, putative, expressed
Chr9	14507200	14507250	+	CDS	0.023352	LOC_Os09g24408	conserved hypothetical protein
Chr9	15959550	15959600	+	5'-UTR	0.0263865	LOC_Os09g26420	AP2 domain containing protein, expressed
Chr9	15962050	15962150	+	CDS	0.0345464	LOC_Os09g26420	AP2 domain containing protein, expressed
Chr9	16153550	16153600	+	CDS	0.023352	LOC_Os09g26620	auxin-repressed protein, putative, expressed
Chr9	16153750	16153800	+	CDS	0.0440533	LOC_Os09g26620	auxin-repressed protein, putative, expressed
Chr9	16439200	16439250	+	5'-UTR	0.0440533	LOC_Os09g27030	oryzain gamma chain precursor, putative, expressed
Chr9	16655050	16655100	+	CDS	0.023352	LOC_Os09g27420	formate--tetrahydrofolate ligase, putative, expressed
Chr9	18469800	18469850	+	CDS	0.0228755	LOC_Os09g30340	photosystem I reaction center subunit, chloroplast precursor, putative, expressed
Chr9	18469950	18470000	+	CDS	0.0427623	LOC_Os09g30340	photosystem I reaction center subunit, chloroplast precursor, putative, expressed
Chr9	19594250	19594300	+	CDS	0.023352	LOC_Os09g32870	OsFBX336 - F-box domain containing protein, expressed
Chr9	20784750	20784800	+	CDS	0.023352	LOC_Os09g36090	plus-3 domain containing protein, expressed
Chr9	21947500	21947550	+	CDS	0.0440533	LOC_Os09g38090	expressed protein
Chr9	22806800	22806850	+	3'-UTR	0.0379345	LOC_Os09g39760	pectinesterase, putative, expressed
Chr9	22934350	22934400	+	5'-UTR	0.023352	LOC_Os09g40000	AGAP005770-PA, putative, expressed
Chr9	22934550	22934600	+	5'-UTR	0.023352	LOC_Os09g40000	AGAP005770-PA, putative, expressed
Chr1	168750	168800	-	3'-UTR	0.023352	LOC_Os01g01340	light-induced protein 1-like, putative, expressed
Chr1	169100	169150	-	3'-UTR	0.0386	LOC_Os01g01340	light-induced protein 1-like, putative, expressed
Chr1	169650	169700	-	3'-UTR	0.0459865	LOC_Os01g01340	light-induced protein 1-like, putative, expressed
Chr1	169750	169800	-	CDS	0.0141595	LOC_Os01g01340	light-induced protein 1-like, putative, expressed
Chr1	516350	516400	-	CDS	0.023352	LOC_Os01g01960	transcriptional repressor, putative, expressed
Chr1	1091250	1091300	-	CDS	0.023352	LOC_Os01g02940	glycosyltransferase protein, putative, expressed
Chr1	1676800	1676850	-	CDS	0.023352	LOC_Os01g03914	cation efflux family protein, putative, expressed
Chr1	3855600	3855650	-	CDS	0.0171947	LOC_Os01g07970	expressed protein
Chr1	4331800	4331850	-	CDS	0.0228755	LOC_Os01g08700	GIGANTEA, putative, expressed
Chr1	4331950	4332000	-	CDS	0.023352	LOC_Os01g08700	GIGANTEA, putative, expressed
Chr1	4332300	4332350	-	CDS	0.0427623	LOC_Os01g08700	GIGANTEA, putative, expressed
Chr1	4333750	4333800	-	CDS	0.0184649	LOC_Os01g08700	GIGANTEA, putative, expressed
Chr1	4334000	4334050	-	CDS	0.00331695	LOC_Os01g08700	GIGANTEA, putative, expressed
Chr1	4334900	4334950	-	CDS	0.00447675	LOC_Os01g08700	GIGANTEA, putative, expressed
Chr1	4335350	4335400	-	CDS	0.00114162	LOC_Os01g08700	GIGANTEA, putative, expressed
Chr1	4336150	4336200	-	CDS	0.0386	LOC_Os01g08700	GIGANTEA, putative, expressed
Chr1	8546450	8546500	-	5'-UTR	0.000742779	LOC_Os01g15270	expressed protein
Chr1	8546650	8546700	-	5'-UTR	0.0440533	LOC_Os01g15270	expressed protein
Chr1	11203100	11203150	-	CDS	0.00331695	LOC_Os01g19740	calvin cycle protein CP12, putative, expressed
Chr1	12924300	12924400	-	3'-UTR	0.0231752	LOC_Os01g22990	acidic leucine-rich nuclear phosphoprotein 32-related protein 1, putative, expressed
Chr1	14344350	14344400	-	CDS	0.00782765	LOC_Os01g25386	multidrug resistance-associated protein, putative, expressed
Chr1	14703750	14703800	-	3'-UTR	0.023352	LOC_Os01g25920	expressed protein
Chr1	18401500	18401550	-	CDS	0.023352	LOC_Os01g33420	glycosyl hydrolase family protein 27, putative, expressed
Chr1	18685000	18685100	-	Intron	0.00166462	LOC_Os01g33960	transposon protein, putative, CACTA, En/Spm sub-class, expressed
Chr1	20601650	20601700	-	CDS	0.0311029	LOC_Os01g36950	N-rich protein, putative, expressed
Chr1	20601800	20601850	-	CDS	0.0362438	LOC_Os01g36950	N-rich protein, putative, expressed
Chr1	21687950	21688000	-	CDS	0.0440533	LOC_Os01g38610	helix-loop-helix DNA-binding domain containing protein, expressed
Chr1	24283600	24283650	-	CDS	0.023352	LOC_Os01g42700	expressed protein
Chr1	24696750	24696800	-	3'-UTR	0.023352	LOC_Os01g43230	expressed protein
Chr1	25351350	25351400	-	CDS	0.0459865	LOC_Os01g44210	50S ribosomal protein L31, putative, expressed
Chr1	26087700	26087750	-	3'-UTR	0.023352	LOC_Os01g45914	expressed protein
Chr1	27109600	27109650	-	CDS	0.0379345	LOC_Os01g47430	protein of unknown function DUF1296 domain containing protein, expressed
Chr1	28016800	28016850	-	3'-UTR	0.00254522	LOC_Os01g48830	expressed protein
Chr1	28018000	28018050	-	3'-UTR	0.000808064	LOC_Os01g48830	expressed protein
Chr1	29486100	29486150	-	CDS	0.023352	LOC_Os01g51290	protein kinase family protein, putative, expressed
Chr1	29488200	29488250	-	5'-UTR	0.0171947	LOC_Os01g51290	protein kinase family protein, putative, expressed
Chr1	29488350	29488400	-	5'-UTR	0.0263865	LOC_Os01g51290	protein kinase family protein, putative, expressed
Chr1	30031250	30031300	-	3'-UTR	0.0407221	LOC_Os01g52250	starch synthase, putative, expressed
Chr1	30031350	30031500	-	3'-UTR	0.0338328	LOC_Os01g52250	starch synthase, putative, expressed
Chr1	30031600	30031650	-	3'-UTR	0.0402836	LOC_Os01g52250	starch synthase, putative, expressed
Chr1	31376500	31376550	-	CDS	0.00782765	LOC_Os01g54560	trehalose synthase, putative, expressed
Chr1	31409700	31409750	-	CDS	0.0263865	LOC_Os01g54600	WRKY13, expressed
Chr1	31588200	31588250	-	Intron	0.0234296	LOC_Os01g54920	heat- and acid-stable phosphoprotein, putative, expressed
Chr1	32708850	32708900	-	CDS	0.0283433	LOC_Os01g56680	photosystem II reaction center W protein, chloroplast precursor, putative, expressed
Chr1	32708950	32709050	-	CDS	0.0320983	LOC_Os01g56680	photosystem II reaction center W protein, chloroplast precursor, putative, expressed
Chr1	32709100	32709150	-	5'-UTR	0.0106815	LOC_Os01g56680	photosystem II reaction center W protein, chloroplast precursor, putative, expressed
Chr1	32763250	32763300	-	CDS	0.023352	LOC_Os01g56780	plus-3 domain containing protein, expressed
Chr1	33523550	33523650	-	CDS	0.0240963	LOC_Os01g57962	photosystem I P700 chlorophyll a apoprotein A2, putative, expressed
Chr1	33524350	33524400	-	CDS	0.023352	LOC_Os01g57962	photosystem I P700 chlorophyll a apoprotein A2, putative, expressed
Chr1	33525950	33526000	-	CDS	0.0379345	LOC_Os01g57964	photosystem I P700 chlorophyll a apoprotein A1, putative, expressed
Chr1	33526900	33526950	-	CDS	0.023352	LOC_Os01g57964	photosystem I P700 chlorophyll a apoprotein A1, putative, expressed
Chr1	33527650	33527700	-	CDS	0.00447675	LOC_Os01g57966	photosystem I assembly protein ycf3, putative, expressed
Chr1	33528300	33528350	-	Intron	0.0263865	LOC_Os01g57966	photosystem I assembly protein ycf3, putative, expressed
Chr1	33528500	33528550	-	CDS	0.0321905	LOC_Os01g57966	photosystem I assembly protein ycf3, putative, expressed
Chr1	33529000	33529150	-	Intron	9.15767e-05	LOC_Os01g57966	photosystem I assembly protein ycf3, putative, expressed
Chr1	33529250	33529350	-	Intron	0.00563256	LOC_Os01g57966	photosystem I assembly protein ycf3, putative, expressed
Chr1	33540400	33540450	-	5'-UTR	0.00782765	LOC_Os01g58000	ATP synthase epsilon chain, putative, expressed
Chr1	34138750	34138800	-	CDS	0.023352	LOC_Os01g59080	expressed protein
Chr1	36736650	36736700	-	CDS	0.023352	LOC_Os01g63410	expressed protein
Chr1	38145900	38145950	-	5'-UTR	0.0379345	LOC_Os01g65690	4,5-DOPA dioxygenase extradiol, putative, expressed
Chr1	38262900	38262950	-	CDS	0.023352	LOC_Os01g65900	chitin-inducible gibberellin-responsive protein, putative, expressed
Chr1	38399500	38399550	-	3'-UTR	0.00270884	LOC_Os01g66120	No apical meristem protein, putative, expressed
Chr1	38400800	38400850	-	CDS	0.00932922	LOC_Os01g66120	No apical meristem protein, putative, expressed
Chr1	38660950	38661000	-	CDS	0.00782765	LOC_Os01g66580	RNA polymerase III RPC4 domain containing protein, expressed
Chr1	38661100	38661150	-	CDS	0.000251654	LOC_Os01g66580	RNA polymerase III RPC4 domain containing protein, expressed
Chr1	39029650	39029700	-	CDS	0.023352	LOC_Os01g67250	Rad21 / Rec8 like protein, putative, expressed
Chr1	39691050	39691100	-	CDS	0.023352	LOC_Os01g68320	DEAD-box ATP-dependent RNA helicase 30, putative, expressed
Chr1	39691800	39691850	-	CDS	0.00782765	LOC_Os01g68320	DEAD-box ATP-dependent RNA helicase 30, putative, expressed
Chr1	39692350	39692450	-	CDS	0.0158513	LOC_Os01g68320	DEAD-box ATP-dependent RNA helicase 30, putative, expressed
Chr1	39794750	39794800	-	3'-UTR	0.023352	LOC_Os01g68490	tetratricopeptide-like helical, putative, expressed
Chr1	40485650	40485700	-	CDS	0.0379345	LOC_Os01g69990	GYF domain containing protein, putative, expressed
Chr1	40488350	40488500	-	CDS	0.0212773	LOC_Os01g69990	GYF domain containing protein, putative, expressed
Chr1	40974150	40974200	-	CDS	0.0379345	LOC_Os01g70790	SRC2 protein, putative, expressed
Chr10	56500	56550	-	Intron	0.0379345	LOC_Os10g01044	isoflavone reductase, putative, expressed
Chr10	56900	56950	-	CDS	0.00782765	LOC_Os10g01044	isoflavone reductase, putative, expressed
Chr10	58150	58200	-	5'-UTR	0.023352	LOC_Os10g01044	isoflavone reductase, putative, expressed
Chr10	656550	656600	-	CDS	0.00782765	LOC_Os10g02040	peroxidase precursor, putative, expressed
Chr10	658450	658500	-	CDS	0.0440533	LOC_Os10g02040	peroxidase precursor, putative, expressed
Chr10	790750	790800	-	CDS	0.023352	LOC_Os10g02240	peptide transporter PTR2, putative, expressed
Chr10	1008500	1008550	-	CDS	0.0171947	LOC_Os10g02630	transposon protein, putative, CACTA, En/Spm sub-class, expressed
Chr10	1009200	1009250	-	CDS	0.0379345	LOC_Os10g02630	transposon protein, putative, CACTA, En/Spm sub-class, expressed
Chr10	5581950	5582000	-	5'-UTR	0.023352	LOC_Os10g10170	PPR repeat domain containing protein, putative, expressed
Chr10	10319900	10319950	-	CDS	0.00508936	LOC_Os10g20480	#N/A
Chr10	10320750	10320800	-	5'-UTR	0.0440533	LOC_Os10g20480	#N/A
Chr10	10322300	10322400	-	5'-UTR	0.0278137	LOC_Os10g20480	#N/A
Chr10	10322500	10322550	-	5'-UTR	0.018827	LOC_Os10g20480	#N/A
Chr10	10807300	10807350	-	CDS	0.0114516	LOC_Os10g21192	photosystem Q, putative, expressed
Chr10	10807600	10807700	-	CDS	8.52242e-08	LOC_Os10g21192	photosystem Q, putative, expressed
Chr10	10808200	10808350	-	CDS	0.00701007	LOC_Os10g21192	photosystem Q, putative, expressed
Chr10	10812050	10812300	-	Intron	0.00997826	LOC_Os10g21196	chloroplast 30S ribosomal protein S16, putative, expressed
Chr10	10812450	10812500	-	Intron	0.0334778	LOC_Os10g21196	chloroplast 30S ribosomal protein S16, putative, expressed
Chr10	10812600	10812750	-	CDS	0.0168793	LOC_Os10g21196	chloroplast 30S ribosomal protein S16, putative, expressed
Chr10	10844300	10844350	-	CDS	0.0231063	LOC_Os10g21248	photosystem I P700 chlorophyll a apoprotein A2, putative, expressed
Chr10	10844950	10845000	-	CDS	0.0198344	LOC_Os10g21248	photosystem I P700 chlorophyll a apoprotein A2, putative, expressed
Chr10	10847750	10847800	-	CDS	0.0277857	LOC_Os10g21250	photosystem I P700 chlorophyll a apoprotein A1, putative, expressed
Chr10	10849000	10849100	-	CDS	0.00304999	LOC_Os10g21254	photosystem I assembly protein ycf3, putative, expressed
Chr10	10849450	10849500	-	Intron	0.023352	LOC_Os10g21254	photosystem I assembly protein ycf3, putative, expressed
Chr10	10849650	10849700	-	Intron	0.0344394	LOC_Os10g21254	photosystem I assembly protein ycf3, putative, expressed
Chr10	10849750	10849850	-	Intron	0.0210686	LOC_Os10g21254	photosystem I assembly protein ycf3, putative, expressed
Chr10	10850450	10850500	-	Intron	1.75488e-06	LOC_Os10g21254	photosystem I assembly protein ycf3, putative, expressed
Chr10	10850650	10850700	-	Intron	2.35546e-06	LOC_Os10g21254	photosystem I assembly protein ycf3, putative, expressed
Chr10	10859750	10859800	-	CDS	0.0344394	LOC_Os10g21266	ATP synthase subunit beta, putative, expressed
Chr10	13258850	13258900	-	CDS	0.000362761	LOC_Os10g25570	expressed protein
Chr10	14172100	14172150	-	CDS	0.0228755	LOC_Os10g26940	BURP domain containing protein, expressed
Chr10	16086450	16086500	-	5'-UTR	0.023352	LOC_Os10g30850	zinc finger, RING-type, putative, expressed
Chr10	19161900	19161950	-	CDS	0.00782765	LOC_Os10g35840	shikimate/quinate 5-dehydrogenase, putative, expressed
Chr10	19162250	19162300	-	5'-UTR	0.0379345	LOC_Os10g35840	shikimate/quinate 5-dehydrogenase, putative, expressed
Chr10	19931150	19931200	-	5'-UTR	0.00782765	LOC_Os10g37240	expressed protein
Chr10	19931600	19931650	-	CDS	0.00782765	LOC_Os10g37240	expressed protein
Chr10	20412300	20412350	-	3'-UTR	0.0379345	LOC_Os10g38110	cytochrome P450, putative, expressed
Chr10	20480600	20480750	-	Intron	0.000735631	LOC_Os10g38272	ATP synthase B chain, putative, expressed
Chr10	20480800	20480900	-	CDS	0.0117937	LOC_Os10g38272	ATP synthase B chain, putative, expressed
Chr10	23197000	23197050	-	3'-UTR	0.023352	LOC_Os10g43075	#N/A
Chr11	260300	260350	-	CDS	0.0440533	LOC_Os11g01439	chloroplast unusual positioning protein, putative, expressed
Chr11	823750	823800	-	CDS	0.0445564	LOC_Os11g02610	BTBN20 - Bric-a-Brac, Tramtrack, Broad Complex BTB domain with non-phototropic hypocotyl 3 NPH3 and coiled-coil domains, expressed
Chr11	1837700	1837750	-	CDS	0.00782765	LOC_Os11g04409	expressed protein
Chr11	3465750	3465800	-	CDS	0.00782765	LOC_Os11g06980	#N/A
Chr11	3489150	3489200	-	3'-UTR	0.000742779	LOC_Os11g07020	fructose-bisphospate aldolase isozyme, putative, expressed
Chr11	3489250	3489300	-	3'-UTR	0.0180432	LOC_Os11g07020	fructose-bisphospate aldolase isozyme, putative, expressed
Chr11	3489600	3489650	-	3'-UTR	0.0096532	LOC_Os11g07020	fructose-bisphospate aldolase isozyme, putative, expressed
Chr11	3490150	3490200	-	5'-UTR	0.0198344	LOC_Os11g07020	fructose-bisphospate aldolase isozyme, putative, expressed
Chr11	3490500	3490600	-	5'-UTR	0.0369251	LOC_Os11g07020	fructose-bisphospate aldolase isozyme, putative, expressed
Chr11	3491350	3491400	-	5'-UTR	0.0397263	LOC_Os11g07020	fructose-bisphospate aldolase isozyme, putative, expressed
Chr11	5662350	5662400	-	CDS	0.023352	LOC_Os11g10420	phosphatidylinositol kinase, putative, expressed
Chr11	5662600	5662650	-	CDS	0.0440533	LOC_Os11g10420	phosphatidylinositol kinase, putative, expressed
Chr11	8104700	8104750	-	CDS	0.023352	LOC_Os11g14430	APOBEC1 complementation factor, putative, expressed
Chr11	8166100	8166150	-	CDS	0.0379345	LOC_Os11g14544	expressed protein
Chr11	13633550	13633600	-	3'-UTR	0.0459865	LOC_Os11g24050	expressed protein
Chr11	13633800	13633850	-	3'-UTR	0.023352	LOC_Os11g24050	expressed protein
Chr11	13633950	13634000	-	3'-UTR	0.023352	LOC_Os11g24050	expressed protein
Chr11	16507450	16507500	-	3'-UTR	0.023352	LOC_Os11g28600	expressed protein
Chr11	21994000	21994050	-	5'-UTR	0.0379345	LOC_Os11g37230	zinc finger, C3HC4 type domain containing protein, expressed
Chr11	26511000	26511050	-	3'-UTR	0.023352	LOC_Os11g43900	translationally-controlled tumor protein, putative, expressed
Chr11	26563100	26563150	-	CDS	0.023352	LOC_Os11g43970	AAA-type ATPase family protein, putative, expressed
Chr11	27116800	27116900	-	3'-UTR	0.012229	LOC_Os11g44810	auxin-repressed protein, putative, expressed
Chr11	27117100	27117150	-	3'-UTR	0.00979592	LOC_Os11g44810	auxin-repressed protein, putative, expressed
Chr11	27117800	27117850	-	CDS	0.0264883	LOC_Os11g44810	auxin-repressed protein, putative, expressed
Chr11	28934250	28934300	-	CDS	0.0402836	LOC_Os11g47970	AAA-type ATPase family protein, putative, expressed
Chr11	28934450	28934550	-	CDS	0.010506	LOC_Os11g47970	AAA-type ATPase family protein, putative, expressed
Chr11	28934650	28934850	-	CDS	0.00571035	LOC_Os11g47970	AAA-type ATPase family protein, putative, expressed
Chr11	28934900	28935000	-	CDS	0.0358048	LOC_Os11g47970	AAA-type ATPase family protein, putative, expressed
Chr11	28935300	28935400	-	CDS	0.00807013	LOC_Os11g47970	AAA-type ATPase family protein, putative, expressed
Chr11	28935500	28935600	-	CDS	0.0040686	LOC_Os11g47970	AAA-type ATPase family protein, putative, expressed
Chr11	28935650	28935700	-	CDS	0.00473225	LOC_Os11g47970	AAA-type ATPase family protein, putative, expressed
Chr11	28935900	28935950	-	Intron	0.0171052	LOC_Os11g47970	AAA-type ATPase family protein, putative, expressed
Chr12	127700	127750	-	3'-UTR	0.023352	LOC_Os12g01220	expressed protein
Chr12	281000	281050	-	CDS	0.0379345	LOC_Os12g01449	chloroplast unusual positioning protein, putative, expressed
Chr12	864800	864900	-	3'-UTR	0.00188943	LOC_Os12g02540	BTBN23 - Bric-a-Brac, Tramtrack, Broad Complex BTB domain with non-phototropic hypocotyl 3 NPH3 and coiled-coil domains, expressed
Chr12	3326400	3326450	-	CDS	0.023352	LOC_Os12g06850	transcription elongation factor protein, putative, expressed
Chr12	3327600	3327650	-	CDS	0.00762113	LOC_Os12g06850	transcription elongation factor protein, putative, expressed
Chr12	5612200	5612250	-	CDS	0.0344394	LOC_Os12g10570	ATP synthase subunit beta, putative, expressed
Chr12	6800050	6800150	-	CDS	0.0345464	LOC_Os12g12360	transposon protein, putative, Mutator sub-class, expressed
Chr12	6987100	6987150	-	CDS	0.0379345	LOC_Os12g12690	transposon protein, putative, Pong sub-class, expressed
Chr12	7097600	7097650	-	CDS	0.0171947	LOC_Os12g12850	ATP-dependent Clp protease ATP-binding subunit clpA homolog,chloroplast precursor, putative, expressed
Chr12	7098300	7098350	-	CDS	0.011911	LOC_Os12g12850	ATP-dependent Clp protease ATP-binding subunit clpA homolog,chloroplast precursor, putative, expressed
Chr12	7098450	7098500	-	CDS	0.0100928	LOC_Os12g12850	ATP-dependent Clp protease ATP-binding subunit clpA homolog,chloroplast precursor, putative, expressed
Chr12	7098550	7098600	-	CDS	0.023352	LOC_Os12g12850	ATP-dependent Clp protease ATP-binding subunit clpA homolog,chloroplast precursor, putative, expressed
Chr12	8541250	8541350	-	5'-UTR	0.000944635	LOC_Os12g14930	ATP synthase protein MI25, putative, expressed
Chr12	8672250	8672300	-	CDS	0.00782765	LOC_Os12g15222	expressed protein
Chr12	9304750	9304800	-	3'-UTR	0.0440533	LOC_Os12g16280	expressed protein
Chr12	10080700	10080800	-	3'-UTR	0.000407522	LOC_Os12g17600	ribulose bisphosphate carboxylase small chain, chloroplast precursor, putative, expressed
Chr12	10080850	10080900	-	CDS	0.0239378	LOC_Os12g17600	ribulose bisphosphate carboxylase small chain, chloroplast precursor, putative, expressed
Chr12	10080950	10081100	-	CDS	0.0128361	LOC_Os12g17600	ribulose bisphosphate carboxylase small chain, chloroplast precursor, putative, expressed
Chr12	10081200	10081300	-	CDS	0.00844034	LOC_Os12g17600	ribulose bisphosphate carboxylase small chain, chloroplast precursor, putative, expressed
Chr12	13371600	13371650	-	Intron	0.0113328	LOC_Os12g23590	#N/A
Chr12	13405800	13405850	-	Intron	0.00473225	LOC_Os12g23610	ATP synthase, A subunit family protein, putative, expressed
Chr12	20540150	20540200	-	3'-UTR	0.0171947	LOC_Os12g34018	ATP synthase protein YMF19, putative, expressed
Chr12	20660500	20660550	-	5'-UTR	0.000253983	LOC_Os12g34108	ATP synthase protein 9, mitochondrial, putative, expressed
Chr12	20700250	20700300	-	CDS	0.0379345	LOC_Os12g34154	ribosomal protein S2, putative, expressed
Chr12	22177350	22177400	-	CDS	0.00782765	LOC_Os12g36180	auxilin, putative, expressed
Chr12	22178150	22178200	-	CDS	0.023352	LOC_Os12g36180	auxilin, putative, expressed
Chr12	24876600	24876650	-	CDS	0.023352	LOC_Os12g40190	G-protein alpha subunit, putative, expressed
Chr12	26364650	26364700	-	CDS	0.0379345	LOC_Os12g42420	DNA binding protein, putative, expressed
Chr12	26426150	26426200	-	CDS	0.00762113	LOC_Os12g42550	methyl-CpG binding domain containing protein, putative, expressed
Chr12	27484800	27484850	-	CDS	0.0263865	LOC_Os12g44330	serine/threonine-protein kinase PRP4, putative, expressed
Chr12	27484950	27485000	-	CDS	0.0059818	LOC_Os12g44330	serine/threonine-protein kinase PRP4, putative, expressed
Chr12	27485300	27485350	-	CDS	0.023352	LOC_Os12g44330	serine/threonine-protein kinase PRP4, putative, expressed
Chr2	82200	82250	-	CDS	0.023352	LOC_Os02g01150	erythronate-4-phosphate dehydrogenase domain containing protein, expressed
Chr2	575200	575250	-	CDS	0.023352	LOC_Os02g02050	SNF2 family N-terminal domain containing protein, expressed
Chr2	755500	755550	-	CDS	0.023352	LOC_Os02g02290	SNF2 family N-terminal domain containing protein, expressed
Chr2	757700	757750	-	CDS	0.0440533	LOC_Os02g02290	SNF2 family N-terminal domain containing protein, expressed
Chr2	825950	826000	-	3'-UTR	0.0187416	LOC_Os02g02400	catalase isozyme A, putative, expressed
Chr2	826200	826300	-	3'-UTR	0.011612	LOC_Os02g02400	catalase isozyme A, putative, expressed
Chr2	826350	826400	-	3'-UTR	0.0386	LOC_Os02g02400	catalase isozyme A, putative, expressed
Chr2	826450	826500	-	CDS	0.00517834	LOC_Os02g02400	catalase isozyme A, putative, expressed
Chr2	826700	826750	-	CDS	0.0458108	LOC_Os02g02400	catalase isozyme A, putative, expressed
Chr2	826800	826850	-	CDS	0.0386	LOC_Os02g02400	catalase isozyme A, putative, expressed
Chr2	827000	827050	-	CDS	0.0279704	LOC_Os02g02400	catalase isozyme A, putative, expressed
Chr2	827150	827200	-	CDS	0.0440533	LOC_Os02g02400	catalase isozyme A, putative, expressed
Chr2	827550	827600	-	5'-UTR	0.0171947	LOC_Os02g02400	catalase isozyme A, putative, expressed
Chr2	839950	840000	-	CDS	0.0379345	LOC_Os02g02410	DnaK family protein, putative, expressed
Chr2	856050	856100	-	5'-UTR	0.0386	LOC_Os02g02424	ZOS2-02 - C2H2 zinc finger protein, expressed
Chr2	1124800	1124850	-	CDS	0.023352	LOC_Os02g02900	expressed protein
Chr2	1655050	1655100	-	CDS	0.0171947	LOC_Os02g03890	nuclear transport factor 2, putative, expressed
Chr2	1695950	1696000	-	CDS	0.0379345	LOC_Os02g03960	CPuORF1 - conserved peptide uORF-containing transcript, expressed
Chr2	1800100	1800150	-	CDS	0.0279704	LOC_Os02g04130	DUF1645 domain containing protein, putative, expressed
Chr2	2861550	2861650	-	CDS	0.023352	LOC_Os02g05790	expressed protein
Chr2	3233800	3233850	-	5'-UTR	5.61406e-05	LOC_Os02g06480	SCO1 protein homolog, mitochondrial precursor, putative, expressed
Chr2	3341500	3341550	-	CDS	0.0168844	LOC_Os02g06640	ubiquitin family protein, putative, expressed
Chr2	4150700	4150750	-	CDS	0.0459865	LOC_Os02g07930	B-box zinc finger family protein, putative, expressed
Chr2	5468950	5469050	-	CDS	0.0229054	LOC_Os02g10390	chlorophyll A-B binding protein, putative, expressed
Chr2	5469150	5469200	-	CDS	0.00462316	LOC_Os02g10390	chlorophyll A-B binding protein, putative, expressed
Chr2	5470050	5470100	-	CDS	0.0283658	LOC_Os02g10390	chlorophyll A-B binding protein, putative, expressed
Chr2	5470200	5470250	-	5'-UTR	0.0339781	LOC_Os02g10390	chlorophyll A-B binding protein, putative, expressed
Chr2	5630650	5630700	-	CDS	0.0459865	LOC_Os02g10700	OsFBL7 - F-box domain and LRR containing protein, expressed
Chr2	6095300	6095350	-	CDS	0.023352	LOC_Os02g11790	OsFBK4 - F-box domain and kelch repeat containing protein, expressed
Chr2	6223000	6223050	-	CDS	0.023352	LOC_Os02g12000	expressed protein
Chr2	6510500	6510550	-	3'-UTR	0.0171947	LOC_Os02g12480	expressed protein
Chr2	6511850	6511900	-	CDS	0.00303774	LOC_Os02g12480	expressed protein
Chr2	6512100	6512200	-	5'-UTR	0.0116219	LOC_Os02g12480	expressed protein
Chr2	6513650	6513700	-	5'-UTR	0.00370399	LOC_Os02g12480	expressed protein
Chr2	7634900	7634950	-	CDS	0.023352	LOC_Os02g13990	U2 small nuclear ribonucleoprotein A, putative, expressed
Chr2	8810900	8810950	-	CDS	0.0379345	LOC_Os02g15660	tetratricopeptide repeat, putative, expressed
Chr2	8811250	8811300	-	CDS	0.0379345	LOC_Os02g15660	tetratricopeptide repeat, putative, expressed
Chr2	8811850	8811900	-	CDS	0.00254522	LOC_Os02g15660	tetratricopeptide repeat, putative, expressed
Chr2	10089250	10089300	-	CDS	0.0379345	LOC_Os02g17534	xyloglucan fucosyltransferase, putative, expressed
Chr2	13951050	13951100	-	CDS	0.0440533	LOC_Os02g24080	SNARE domain containing protein, putative, expressed
Chr2	14286600	14286650	-	CDS	0.0149316	LOC_Os02g24632	photosystem II 44 kDa reaction center protein, putative, expressed
Chr2	14287950	14288000	-	CDS	0.0458108	LOC_Os02g24636	expressed protein
Chr2	17157100	17157150	-	CDS	0.0231063	LOC_Os02g28980	peptidyl-prolyl isomerase, putative, expressed
Chr2	19048350	19048400	-	CDS	0.0379345	LOC_Os02g32250	retrotransposon protein, putative, unclassified, expressed
Chr2	19048550	19048600	-	5'-UTR	0.023352	LOC_Os02g32250	retrotransposon protein, putative, unclassified, expressed
Chr2	19050500	19050550	-	5'-UTR	0.000251654	LOC_Os02g32250	retrotransposon protein, putative, unclassified, expressed
Chr2	19303900	19303950	-	CDS	0.023352	LOC_Os02g32580	expressed protein
Chr2	19326150	19326200	-	3'-UTR	0.023352	LOC_Os02g32610	protein kinase domain containing protein, expressed
Chr2	19326300	19326350	-	3'-UTR	0.023352	LOC_Os02g32610	protein kinase domain containing protein, expressed
Chr2	19414550	19414600	-	Intron	5.42119e-06	LOC_Os02g32690	pleiotropic drug resistance protein 15, putative, expressed
Chr2	20687300	20687350	-	CDS	0.023352	LOC_Os02g34510	vacuolar ATP synthase, putative, expressed
Chr2	20871350	20871400	-	CDS	0.0379345	LOC_Os02g34810	OsAPx8 - Thylakoid-bound Ascorbate Peroxidase encoding gene 5,8, expressed
Chr2	22742850	22742900	-	CDS	0.023352	LOC_Os02g37690	UDP-glucoronosyl and UDP-glucosyl transferase, putative, expressed
Chr2	23550350	23550400	-	3'-UTR	0.023352	LOC_Os02g38980	bromodomain domain containing protein, expressed
Chr2	23550700	23550750	-	CDS	0.011911	LOC_Os02g38980	bromodomain domain containing protein, expressed
Chr2	23551050	23551100	-	CDS	0.00762113	LOC_Os02g38980	bromodomain domain containing protein, expressed
Chr2	23551450	23551500	-	CDS	0.0440533	LOC_Os02g38980	bromodomain domain containing protein, expressed
Chr2	23768800	23768850	-	5'-UTR	0.0164896	LOC_Os02g39384	expressed protein
Chr2	24141600	24141650	-	CDS	0.023352	LOC_Os02g39920	AT hook motif family protein, expressed
Chr2	24974050	24974100	-	CDS	0.00254522	LOC_Os02g41630	phenylalanine ammonia-lyase, putative, expressed
Chr2	24974550	24974600	-	CDS	0.0440533	LOC_Os02g41630	phenylalanine ammonia-lyase, putative, expressed
Chr2	24974700	24974850	-	CDS	0.0269095	LOC_Os02g41630	phenylalanine ammonia-lyase, putative, expressed
Chr2	24974900	24974950	-	CDS	0.00462316	LOC_Os02g41630	phenylalanine ammonia-lyase, putative, expressed
Chr2	24975000	24975050	-	CDS	0.0364885	LOC_Os02g41630	phenylalanine ammonia-lyase, putative, expressed
Chr2	24975300	24975350	-	CDS	0.0231063	LOC_Os02g41630	phenylalanine ammonia-lyase, putative, expressed
Chr2	24989100	24989150	-	CDS	0.00782765	LOC_Os02g41650	phenylalanine ammonia-lyase, putative, expressed
Chr2	27137600	27137650	-	CDS	0.0379345	LOC_Os02g44820	rho-GTPase-activating protein-related, putative, expressed
Chr2	27336400	27336450	-	CDS	0.023352	LOC_Os02g45070	PINHEAD, putative, expressed
Chr2	28627050	28627100	-	3'-UTR	0.0379345	LOC_Os02g46920	expressed protein
Chr2	28627650	28627700	-	3'-UTR	0.0440533	LOC_Os02g46920	expressed protein
Chr2	29026700	29026750	-	CDS	0.0171947	LOC_Os02g47510	9-cis-epoxycarotenoid dioxygenase 1, chloroplast precursor, putative, expressed
Chr2	29382850	29382900	-	CDS	0.023352	LOC_Os02g48010	nuclear matrix constituent protein 1-like, putative, expressed
Chr2	29383050	29383100	-	CDS	0.00782765	LOC_Os02g48010	nuclear matrix constituent protein 1-like, putative, expressed
Chr2	29384700	29384750	-	CDS	0.023352	LOC_Os02g48010	nuclear matrix constituent protein 1-like, putative, expressed
Chr2	29726050	29726100	-	CDS	0.000808064	LOC_Os02g48560	fatty acid desaturase, putative, expressed
Chr2	29789300	29789350	-	CDS	0.023352	LOC_Os02g48640	expressed protein
Chr2	31996300	31996350	-	CDS	0.0379345	LOC_Os02g52250	SKIP/SNW domain containing protein, expressed
Chr2	33443100	33443150	-	CDS	0.00762113	LOC_Os02g54600	STE_MEK_ste7_MAP2K.5 - STE kinases include homologs to sterile 7, sterile 11 and sterile 20 from yeast, expressed
Chr2	34470000	34470050	-	CDS	0.023352	LOC_Os02g56310	calcium-dependent protein kinase isoform AK1, putative, expressed
Chr2	34890600	34890650	-	Intron	0.023352	LOC_Os02g56920	WAX2, putative, expressed
Chr2	35092400	35092450	-	3'-UTR	0.0284893	LOC_Os02g57290	cytochrome P450, putative, expressed
Chr2	35093100	35093150	-	3'-UTR	0.0386	LOC_Os02g57290	cytochrome P450, putative, expressed
Chr3	1788100	1788200	-	CDS	0.0344585	LOC_Os03g03910	catalase domain containing protein, expressed
Chr3	1788300	1788400	-	CDS	0.0190316	LOC_Os03g03910	catalase domain containing protein, expressed
Chr3	1788750	1788800	-	CDS	0.0408298	LOC_Os03g03910	catalase domain containing protein, expressed
Chr3	1789150	1789200	-	CDS	0.011911	LOC_Os03g03910	catalase domain containing protein, expressed
Chr3	1789800	1789850	-	CDS	0.023352	LOC_Os03g03910	catalase domain containing protein, expressed
Chr3	2653900	2653950	-	CDS	0.0171947	LOC_Os03g05390	Citrate transporter protein, putative, expressed
Chr3	2867600	2867650	-	CDS	0.023352	LOC_Os03g05750	heavy-metal-associated domain-containing protein, putative, expressed
Chr3	3126500	3126550	-	3'-UTR	0.023352	LOC_Os03g06240	YT521-B-like family domain containing protein, expressed
Chr3	3129400	3129450	-	CDS	0.00254522	LOC_Os03g06240	YT521-B-like family domain containing protein, expressed
Chr3	3550150	3550200	-	CDS	0.0379345	LOC_Os03g06950	ubiquitin carboxyl-terminal hydrolase domain containing protein, expressed
Chr3	4217150	4217200	-	3'-UTR	0.0459865	LOC_Os03g08284	expressed protein
Chr3	4372550	4372600	-	CDS	0.00782765	LOC_Os03g08500	AP2 domain containing protein, expressed
Chr3	4373250	4373300	-	CDS	0.0379345	LOC_Os03g08500	AP2 domain containing protein, expressed
Chr3	4683050	4683100	-	CDS	0.0171947	LOC_Os03g09020	dehydrogenase, putative, expressed
Chr3	4827700	4827750	-	CDS	0.00254522	LOC_Os03g09250	inositol-3-phosphate synthase, putative, expressed
Chr3	5081200	5081250	-	CDS	0.0379345	LOC_Os03g10060	S10/S20 domain containing ribosomal protein, putative, expressed
Chr3	5081450	5081500	-	CDS	0.00462316	LOC_Os03g10060	S10/S20 domain containing ribosomal protein, putative, expressed
Chr3	5467600	5467650	-	CDS	0.0083506	LOC_Os03g10700	expressed protein
Chr3	5468150	5468200	-	CDS	0.023352	LOC_Os03g10700	expressed protein
Chr3	5590800	5590850	-	CDS	0.0279704	LOC_Os03g10880	BTBN5 - Bric-a-Brac, Tramtrack, Broad Complex BTB domain with non-phototropic hypocotyl 3 NPH3 and coiled-coil domains, expressed
Chr3	7103450	7103500	-	Intron	3.44169e-15	LOC_Os03g13170	ubiquitin fusion protein, putative, expressed
Chr3	7103600	7103650	-	Intron	9.18808e-05	LOC_Os03g13170	ubiquitin fusion protein, putative, expressed
Chr3	7965850	7965900	-	CDS	0.0284893	LOC_Os03g14654	LTPL108 - Protease inhibitor/seed storage/LTP family protein precursor, expressed
Chr3	7977000	7977050	-	3'-UTR	0.0440533	LOC_Os03g14669	core histone H2A/H2B/H3/H4, putative, expressed
Chr3	8166050	8166100	-	3'-UTR	0.0459865	LOC_Os03g14980	lissencephaly type-1-like homology motif, putative, expressed
Chr3	8219450	8219500	-	CDS	0.0171947	LOC_Os03g15050	phosphoenolpyruvate carboxykinase, putative, expressed
Chr3	8219850	8219900	-	CDS	0.00782765	LOC_Os03g15050	phosphoenolpyruvate carboxykinase, putative, expressed
Chr3	8221750	8221800	-	5'-UTR	0.0231063	LOC_Os03g15050	phosphoenolpyruvate carboxykinase, putative, expressed
Chr3	8223600	8223650	-	CDS	0.0263865	LOC_Os03g15050	phosphoenolpyruvate carboxykinase, putative, expressed
Chr3	8223800	8223850	-	CDS	0.023352	LOC_Os03g15050	phosphoenolpyruvate carboxykinase, putative, expressed
Chr3	8790050	8790100	-	CDS	0.0440533	LOC_Os03g15920	expressed protein
Chr3	9452800	9452850	-	5'-UTR	0.00782765	LOC_Os03g17010	RNA recognition motif containing protein, putative, expressed
Chr3	9492200	9492250	-	CDS	0.000808064	LOC_Os03g17070	ATP synthase B chain, chloroplast precursor, putative, expressed
Chr3	9761050	9761100	-	3'-UTR	0.023352	LOC_Os03g17570	response regulator receiver domain containing protein, expressed
Chr3	9761300	9761350	-	3'-UTR	0.0427623	LOC_Os03g17570	response regulator receiver domain containing protein, expressed
Chr3	9761400	9761450	-	3'-UTR	0.0386	LOC_Os03g17570	response regulator receiver domain containing protein, expressed
Chr3	9761500	9761550	-	3'-UTR	0.0231063	LOC_Os03g17570	response regulator receiver domain containing protein, expressed
Chr3	9767550	9767600	-	CDS	0.0114516	LOC_Os03g17570	response regulator receiver domain containing protein, expressed
Chr3	10120650	10120700	-	CDS	0.0440533	LOC_Os03g18130	asparagine synthetase, putative, expressed
Chr3	10121350	10121400	-	CDS	0.0379345	LOC_Os03g18130	asparagine synthetase, putative, expressed
Chr3	10418950	10419000	-	3'-UTR	0.00762113	LOC_Os03g18600	cyclase/dehydrase family protein, putative, expressed
Chr3	10827100	10827150	-	CDS	0.0458108	LOC_Os03g19250	AMP-binding enzyme, putative, expressed
Chr3	10997100	10997150	-	CDS	0.00782765	LOC_Os03g19560	tetratricopeptide repeat domain containing protein, expressed
Chr3	11920500	11920550	-	CDS	0.0379345	LOC_Os03g21000	thioredoxin, putative, expressed
Chr3	11921100	11921150	-	CDS	0.00782765	LOC_Os03g21000	thioredoxin, putative, expressed
Chr3	12768600	12768650	-	CDS	0.0179998	LOC_Os03g22270	auxin-repressed protein, putative, expressed
Chr3	12906850	12906950	-	CDS	0.0250522	LOC_Os03g22490	heavy metal-associated domain containing protein, expressed
Chr3	12907000	12907050	-	CDS	0.0391838	LOC_Os03g22490	heavy metal-associated domain containing protein, expressed
Chr3	15118800	15118850	-	3'-UTR	0.023352	LOC_Os03g26460	CS domain containing protein, putative, expressed
Chr3	16920850	16920900	-	5'-UTR	0.00782765	LOC_Os03g29680	EARLY flowering protein, putative, expressed
Chr3	17021850	17021900	-	CDS	7.71403e-05	LOC_Os03g29864	retrotransposon protein, putative, unclassified, expressed
Chr3	21098700	21098750	-	Intron	0.0391838	LOC_Os03g38000	40S ribosomal protein S3-1, putative, expressed
Chr3	22169800	22169850	-	5'-UTR	1.26307e-07	LOC_Os03g39860	acyl carrier protein, putative, expressed
Chr3	22238750	22238800	-	5'-UTR	0.0440533	LOC_Os03g40020	PPR repeat containing protein, expressed
Chr3	26895050	26895100	-	Intron	0.0208305	LOC_Os03g47560	retrotransposon protein, putative, unclassified, expressed
Chr3	27418250	27418300	-	CDS	0.0379345	LOC_Os03g48180	peptide transporter PTR2, putative, expressed
Chr3	27591450	27591500	-	CDS	0.023352	LOC_Os03g48450	SCARECROW, putative, expressed
Chr3	28254900	28254950	-	CDS	0.0379345	LOC_Os03g49620	BRASSINOSTEROID INSENSITIVE 1-associated receptor kinase 1 precursor, putative, expressed
Chr3	28275100	28275150	-	CDS	0.023352	LOC_Os03g49640	STE_MEKK_ste11_MAP3K.14 - STE kinases include homologs to sterile 7, sterile 11 and sterile 20 from yeast, expressed
Chr3	29953500	29953550	-	CDS	0.023352	LOC_Os03g52170	4-hydroxy-3-methylbut-2-enyl diphosphate reductase, putative, expressed
Chr3	30207050	30207100	-	3'-UTR	0.0284893	LOC_Os03g52690	CBS domain containing membrane protein, putative, expressed
Chr3	30207900	30207950	-	CDS	0.000808064	LOC_Os03g52690	CBS domain containing membrane protein, putative, expressed
Chr3	31180800	31180850	-	Intron	0.000154821	LOC_Os03g54860	60S ribosomal protein L13a-2, putative, expressed
Chr3	31185050	31185100	-	Intron	0.00517834	LOC_Os03g54860	60S ribosomal protein L13a-2, putative, expressed
Chr3	31605650	31605700	-	CDS	0.0279704	LOC_Os03g55540	ZOS3-18 - C2H2 zinc finger protein, expressed
Chr3	31820150	31820200	-	Intron	0.023352	LOC_Os03g55874	ATP synthase subunit beta, putative, expressed
Chr3	32087800	32087850	-	CDS	0.0440533	LOC_Os03g56280	lactate/malate dehydrogenase, putative, expressed
Chr3	32273350	32273450	-	3'-UTR	0.0375307	LOC_Os03g56670	#N/A
Chr3	32273600	32273650	-	CDS	0.0438667	LOC_Os03g56670	#N/A
Chr3	32590500	32590550	-	CDS	0.0379345	LOC_Os03g57149	mTERF domain containing protein, expressed
Chr3	32879700	32879750	-	CDS	0.00254522	LOC_Os03g57690	aldehyde oxidase, putative, expressed
Chr3	32879850	32879900	-	CDS	0.00331695	LOC_Os03g57690	aldehyde oxidase, putative, expressed
Chr3	32880800	32880850	-	CDS	0.023352	LOC_Os03g57690	aldehyde oxidase, putative, expressed
Chr3	33475150	33475200	-	CDS	0.0379345	LOC_Os03g58780	expressed protein
Chr3	33749600	33749650	-	CDS	0.023352	LOC_Os03g59264	calreticulin family protein, expressed
Chr3	34560750	34560800	-	5'-UTR	0	LOC_Os03g60820	transporter, major facilitator superfamily domain containing protein, expressed
Chr3	34567700	34567750	-	CDS	0.0100928	LOC_Os03g60840	BBTI13 - Bowman-Birk type bran trypsin inhibitor precursor, expressed
Chr3	35714600	35714650	-	CDS	0.0231063	LOC_Os03g63200	powdery mildew resistance protein PM3b, putative, expressed
Chr4	8119950	8120000	-	CDS	0.023352	LOC_Os04g14510	expressed protein
Chr4	9075950	9076000	-	CDS	0.0379345	LOC_Os04g16680	fructose-1,6-bisphosphatase, putative, expressed
Chr4	9110750	9110800	-	CDS	0.0100928	LOC_Os04g16736	photosystem I assembly protein ycf3, putative, expressed
Chr4	9110850	9110900	-	CDS	0.00916483	LOC_Os04g16736	photosystem I assembly protein ycf3, putative, expressed
Chr4	9111250	9111300	-	Intron	0.00142204	LOC_Os04g16736	photosystem I assembly protein ycf3, putative, expressed
Chr4	9111350	9111400	-	Intron	6.97928e-06	LOC_Os04g16736	photosystem I assembly protein ycf3, putative, expressed
Chr4	9111750	9111850	-	CDS	0.0306433	LOC_Os04g16736	photosystem I assembly protein ycf3, putative, expressed
Chr4	9111900	9111950	-	Intron	0.0231063	LOC_Os04g16736	photosystem I assembly protein ycf3, putative, expressed
Chr4	9112100	9112250	-	Intron	0.00952263	LOC_Os04g16736	photosystem I assembly protein ycf3, putative, expressed
Chr4	9112350	9112450	-	Intron	0.00104785	LOC_Os04g16736	photosystem I assembly protein ycf3, putative, expressed
Chr4	9117400	9117450	-	Intron	0.0171947	LOC_Os04g16742	NADPH-dependent oxidoreductase, putative, expressed
Chr4	9117500	9117600	-	Intron	0.0300243	LOC_Os04g16742	NADPH-dependent oxidoreductase, putative, expressed
Chr4	9130450	9130500	-	CDS	0.0440533	LOC_Os04g16760	photosystem I P700 chlorophyll a apoprotein A1, putative, expressed
Chr4	9131750	9131800	-	Intron	0.018827	LOC_Os04g16762	photosystem I assembly protein ycf3, putative
Chr4	9131850	9132100	-	Intron	0.00995183	LOC_Os04g16762	photosystem I assembly protein ycf3, putative
Chr4	9132600	9132750	-	Intron	1.66036e-06	LOC_Os04g16762	photosystem I assembly protein ycf3, putative
Chr4	9153500	9153550	-	CDS	0.0440533	LOC_Os04g16816	uncharacterized protein ycf72, putative
Chr4	9162800	9162850	-	CDS	0.00641703	LOC_Os04g16846	cytochrome b6, putative, expressed
Chr4	9164900	9164950	-	CDS	0.0379345	LOC_Os04g16854	NADPH-dependent oxidoreductase, putative, expressed
Chr4	9165400	9165450	-	CDS	0.0117074	LOC_Os04g16854	NADPH-dependent oxidoreductase, putative, expressed
Chr4	9165850	9165900	-	Intron	0.0291616	LOC_Os04g16854	NADPH-dependent oxidoreductase, putative, expressed
Chr4	9166150	9166200	-	CDS	0.0112795	LOC_Os04g16854	NADPH-dependent oxidoreductase, putative, expressed
Chr4	9167200	9167300	-	CDS	0.0294335	LOC_Os04g16856	chloroplast 30S ribosomal protein S7, putative, expressed
Chr4	9199550	9199600	-	CDS	0.00335426	LOC_Os04g16886	chloroplast 30S ribosomal protein S7, putative, expressed
Chr4	13653050	13653100	-	CDS	0.0171947	LOC_Os04g23890	AGC_PVPK_like_kin82y.10 - ACG kinases include homologs to PKA, PKG and PKC, expressed
Chr4	13653200	13653250	-	CDS	0.0129487	LOC_Os04g23890	AGC_PVPK_like_kin82y.10 - ACG kinases include homologs to PKA, PKG and PKC, expressed
Chr4	13653400	13653450	-	CDS	0.0344394	LOC_Os04g23890	AGC_PVPK_like_kin82y.10 - ACG kinases include homologs to PKA, PKG and PKC, expressed
Chr4	14743200	14743250	-	CDS	0.00782765	LOC_Os04g25440	cytokinin-O-glucosyltransferase 2, putative, expressed
Chr4	16648250	16648300	-	5'-UTR	0.023352	LOC_Os04g28180	ribosomal protein, putative, expressed
Chr4	16865500	16865550	-	Intron	0.023352	LOC_Os04g28480	retrotransposon protein, putative, unclassified, expressed
Chr4	18607150	18607200	-	5'-UTR	0.023352	LOC_Os04g31120	OsFBK14 - F-box domain and kelch repeat containing protein, expressed
Chr4	19605600	19605650	-	CDS	0.023352	LOC_Os04g32560	ATP-dependent Clp protease ATP-binding subunit clpA homolog CD4B,chloroplast precursor, putative, expressed
Chr4	19615100	19615150	-	CDS	0.0324806	LOC_Os04g32590	transcription factor, putative, expressed
Chr4	19941550	19941600	-	CDS	0.023352	LOC_Os04g32980	protein binding protein, putative, expressed
Chr4	20890250	20890300	-	CDS	0.023352	LOC_Os04g34500	retrotransposon protein, putative, unclassified, expressed
Chr4	20890400	20890450	-	CDS	0.023352	LOC_Os04g34500	retrotransposon protein, putative, unclassified, expressed
Chr4	21234450	21234500	-	CDS	0.023352	LOC_Os04g34940	protein of unknown function domain containing protein, expressed
Chr4	22836200	22836250	-	3'-UTR	0.00354983	LOC_Os04g38410	chlorophyll A-B binding protein, putative, expressed
Chr4	22836550	22836600	-	CDS	0.0186346	LOC_Os04g38410	chlorophyll A-B binding protein, putative, expressed
Chr4	22836850	22836900	-	CDS	0.00935503	LOC_Os04g38410	chlorophyll A-B binding protein, putative, expressed
Chr4	24326000	24326050	-	3'-UTR	0.0171947	LOC_Os04g40990	malate synthase, glyoxysomal, putative, expressed
Chr4	24326250	24326300	-	CDS	0.0379345	LOC_Os04g40990	malate synthase, glyoxysomal, putative, expressed
Chr4	24326500	24326550	-	CDS	0.0440533	LOC_Os04g40990	malate synthase, glyoxysomal, putative, expressed
Chr4	24327550	24327600	-	CDS	0.0379345	LOC_Os04g40990	malate synthase, glyoxysomal, putative, expressed
Chr4	24648500	24648550	-	3'-UTR	0.0379345	LOC_Os04g41560	B-box zinc finger family protein, putative, expressed
Chr4	24648750	24648800	-	CDS	0.0083506	LOC_Os04g41560	B-box zinc finger family protein, putative, expressed
Chr4	31504000	31504050	-	3'-UTR	0.023352	LOC_Os04g52900	ABC transporter family protein, putative, expressed
Chr4	31504200	31504250	-	3'-UTR	0.023352	LOC_Os04g52900	ABC transporter family protein, putative, expressed
Chr4	32333650	32333700	-	CDS	0.023352	LOC_Os04g54300	wound induced protein, putative, expressed
Chr4	33031700	33031750	-	5'-UTR	0.023352	LOC_Os04g55520	AP2 domain containing protein, expressed
Chr4	33624450	33624500	-	3'-UTR	0.023352	LOC_Os04g56400	glutamine synthetase, catalytic domain containing protein, expressed
Chr4	33625250	33625300	-	CDS	0.0279704	LOC_Os04g56400	glutamine synthetase, catalytic domain containing protein, expressed
Chr4	33625400	33625450	-	CDS	0.0427623	LOC_Os04g56400	glutamine synthetase, catalytic domain containing protein, expressed
Chr4	33625500	33625550	-	CDS	0.00762113	LOC_Os04g56400	glutamine synthetase, catalytic domain containing protein, expressed
Chr4	33628300	33628350	-	3'-UTR	0.006052	LOC_Os04g56400	glutamine synthetase, catalytic domain containing protein, expressed
Chr4	33628400	33628500	-	CDS	0.0244243	LOC_Os04g56400	glutamine synthetase, catalytic domain containing protein, expressed
Chr4	33628800	33628850	-	CDS	0.0407221	LOC_Os04g56400	glutamine synthetase, catalytic domain containing protein, expressed
Chr4	33629450	33629500	-	CDS	0.0458108	LOC_Os04g56400	glutamine synthetase, catalytic domain containing protein, expressed
Chr4	33630600	33630650	-	CDS	0.0408298	LOC_Os04g56400	glutamine synthetase, catalytic domain containing protein, expressed
Chr4	34115100	34115150	-	CDS	0.023352	LOC_Os04g57300	phosphatidylinositol 3- and 4-kinase family protein, putative, expressed
Chr4	34695600	34695650	-	CDS	0.0471983	LOC_Os04g58280	stem-specific protein TSJT1, putative, expressed
Chr4	34695700	34695750	-	CDS	0.000531076	LOC_Os04g58280	stem-specific protein TSJT1, putative, expressed
Chr4	34908850	34908900	-	CDS	0.023352	LOC_Os04g58710	AMP-binding domain containing protein, expressed
Chr4	34909800	34909900	-	CDS	0.00794622	LOC_Os04g58710	AMP-binding domain containing protein, expressed
Chr4	34923300	34923350	-	Intron	0.00782765	LOC_Os04g58730	AT hook motif domain containing protein, expressed
Chr4	34924350	34924450	-	CDS	0.0248693	LOC_Os04g58730	AT hook motif domain containing protein, expressed
Chr4	35001700	35001750	-	CDS	0.0279704	LOC_Os04g58850	harpin-induced protein 1 domain containing protein, expressed
Chr4	35215550	35215600	-	CDS	0.00254522	LOC_Os04g59200	peroxidase precursor, putative, expressed
Chr4	35216000	35216050	-	CDS	0.0459865	LOC_Os04g59200	peroxidase precursor, putative, expressed
Chr4	35216150	35216200	-	CDS	0.0379345	LOC_Os04g59200	peroxidase precursor, putative, expressed
Chr4	35216350	35216400	-	CDS	0.0459865	LOC_Os04g59200	peroxidase precursor, putative, expressed
Chr5	407700	407750	-	CDS	0.0279704	LOC_Os05g01675	photosystem I P700 chlorophyll a apoprotein A1, putative, expressed
Chr5	1001050	1001100	-	CDS	0.0279704	LOC_Os05g02780	glycine-rich protein A3, putative, expressed
Chr5	1001900	1001950	-	CDS	0.0459865	LOC_Os05g02780	glycine-rich protein A3, putative, expressed
Chr5	1156550	1156600	-	3'-UTR	0.0263865	LOC_Os05g03040	AP2 domain containing protein, expressed
Chr5	1159000	1159050	-	CDS	0.00508936	LOC_Os05g03040	AP2 domain containing protein, expressed
Chr5	1159450	1159500	-	CDS	0.0445564	LOC_Os05g03040	AP2 domain containing protein, expressed
Chr5	1505750	1505800	-	CDS	0.0379345	LOC_Os05g03550	MYB family transcription factor, putative, expressed
Chr5	1507750	1507800	-	CDS	0.00782765	LOC_Os05g03550	MYB family transcription factor, putative, expressed
Chr5	2220200	2220250	-	CDS	0.0379345	LOC_Os05g04700	OsRCI2-6 - Hydrophobic protein LTI6B, expressed
Chr5	2820000	2820050	-	3'-UTR	0.023352	LOC_Os05g05670	1-aminocyclopropane-1-carboxylate oxidase, putative, expressed
Chr5	2976050	2976100	-	CDS	0.023352	LOC_Os05g05950	TOC159, putative, expressed
Chr5	3705000	3705050	-	CDS	0.023352	LOC_Os05g07050	pre-mRNA-processing-splicing factor 8, putative, expressed
Chr5	4998600	4998650	-	CDS	0.023352	LOC_Os05g09020	WRKY67, expressed
Chr5	4999350	4999400	-	5'-UTR	0.0171947	LOC_Os05g09020	WRKY67, expressed
Chr5	4999500	4999550	-	5'-UTR	0.023352	LOC_Os05g09020	WRKY67, expressed
Chr5	7746950	7747000	-	CDS	4.49331e-09	LOC_Os05g13940	retrotransposon protein, putative, unclassified, expressed
Chr5	7747550	7747600	-	CDS	6.62086e-05	LOC_Os05g13940	retrotransposon protein, putative, unclassified, expressed
Chr5	7747650	7747800	-	CDS	0.00685843	LOC_Os05g13940	retrotransposon protein, putative, unclassified, expressed
Chr5	7850100	7850150	-	CDS	0.00142204	LOC_Os05g14040	G-patch domain containing protein, expressed
Chr5	12889100	12889150	-	CDS	0.00762113	LOC_Os05g22718	chloroplast 30S ribosomal protein S8, putative, expressed
Chr5	12959250	12959400	-	CDS	0.000850988	LOC_Os05g22840	expressed protein
Chr5	12959650	12959750	-	Intron	0.00223838	LOC_Os05g22840	expressed protein
Chr5	12960000	12960050	-	Intron	0.00369125	LOC_Os05g22840	expressed protein
Chr5	12960100	12960150	-	Intron	5.28121e-06	LOC_Os05g22840	expressed protein
Chr5	12960300	12960500	-	CDS	0.00659142	LOC_Os05g22840	expressed protein
Chr5	13073700	13073750	-	CDS	0.023352	LOC_Os05g22940	acetyl-CoA carboxylase, putative, expressed
Chr5	16179250	16179300	-	CDS	0.00254522	LOC_Os05g27780	expressed protein
Chr5	16305150	16305200	-	CDS	0.023352	LOC_Os05g27940	40S ribosomal protein S7, putative, expressed
Chr5	19330100	19330150	-	Intron	0.00782765	LOC_Os05g32970	expressed protein
Chr5	19783200	19783250	-	CDS	0.0379345	LOC_Os05g33630	inosine-uridine preferring nucleoside hydrolase family protein, putative, expressed
Chr5	19783350	19783400	-	CDS	0.0459865	LOC_Os05g33630	inosine-uridine preferring nucleoside hydrolase family protein, putative, expressed
Chr5	19961900	19961950	-	CDS	0.0171947	LOC_Os05g33840	transketolase, putative, expressed
Chr5	19962100	19962150	-	CDS	0.00253717	LOC_Os05g33840	transketolase, putative, expressed
Chr5	20971850	20971950	-	CDS	0.00293109	LOC_Os05g35320	ATP synthase like protein, putative, expressed
Chr5	20972000	20972050	-	CDS	0.0438667	LOC_Os05g35320	ATP synthase like protein, putative, expressed
Chr5	21079150	21079250	-	CDS	0.0305307	LOC_Os05g35470	dienelactone hydrolase family protein, expressed
Chr5	23239950	23240000	-	3'-UTR	0.00782765	LOC_Os05g39580	bet v I allergen family protein, putative, expressed
Chr5	23240050	23240100	-	CDS	0.0231063	LOC_Os05g39580	bet v I allergen family protein, putative, expressed
Chr5	23484550	23484600	-	Intron	0.023352	LOC_Os05g39960	40S ribosomal protein S26, putative, expressed
Chr5	23572050	23572150	-	CDS	0.019953	LOC_Os05g40120	expressed protein
Chr5	24325250	24325300	-	3'-UTR	0.0459865	LOC_Os05g41550	expressed protein
Chr5	24328300	24328350	-	5'-UTR	0.00782765	LOC_Os05g41550	expressed protein
Chr5	24329450	24329500	-	5'-UTR	0.0445564	LOC_Os05g41550	expressed protein
Chr5	27247050	27247100	-	CDS	0.0440533	LOC_Os05g47560	serine/threonine-protein kinase SNT7, chloroplast precursor, putative, expressed
Chr5	27249050	27249100	-	CDS	0.00782765	LOC_Os05g47560	serine/threonine-protein kinase SNT7, chloroplast precursor, putative, expressed
Chr6	149500	149550	-	3'-UTR	0.023352	LOC_Os06g01210	plastocyanin, chloroplast precursor, putative, expressed
Chr6	149650	149700	-	3'-UTR	0.0401596	LOC_Os06g01210	plastocyanin, chloroplast precursor, putative, expressed
Chr6	150050	150100	-	CDS	0.0459865	LOC_Os06g01210	plastocyanin, chloroplast precursor, putative, expressed
Chr6	479550	479600	-	CDS	0.0440533	LOC_Os06g01850	ferredoxin--NADP reductase, chloroplast precursor, putative, expressed
Chr6	812850	812900	-	CDS	0.0458108	LOC_Os06g02380	T-complex protein, putative, expressed
Chr6	813700	813750	-	CDS	0.023352	LOC_Os06g02380	T-complex protein, putative, expressed
Chr6	1645700	1645750	-	3'-UTR	0.023352	LOC_Os06g04030	histone H3, putative, expressed
Chr6	1646000	1646050	-	CDS	0.0231063	LOC_Os06g04030	histone H3, putative, expressed
Chr6	1674650	1674700	-	3'-UTR	0.00331695	LOC_Os06g04070	pyridoxal-dependent decarboxylase protein, putative, expressed
Chr6	1675850	1675900	-	CDS	0.0459865	LOC_Os06g04070	pyridoxal-dependent decarboxylase protein, putative, expressed
Chr6	1812000	1812050	-	CDS	0.000808064	LOC_Os06g04270	transketolase, chloroplast precursor, putative, expressed
Chr6	2640900	2640950	-	CDS	0.00254522	LOC_Os06g05800	RNA recognition motif containing protein, putative, expressed
Chr6	3992900	3992950	-	Intron	6.06736e-09	LOC_Os06g08240	expressed protein
Chr6	4269750	4269800	-	5'-UTR	0.023352	LOC_Os06g08570	PPR repeat domain containing protein, putative, expressed
Chr6	4270300	4270350	-	5'-UTR	0.0440533	LOC_Os06g08570	PPR repeat domain containing protein, putative, expressed
Chr6	4797400	4797450	-	CDS	0.023352	LOC_Os06g09450	sucrose synthase, putative, expressed
Chr6	5040800	5040850	-	5'-UTR	0.0171947	LOC_Os06g09890	smr domain containing protein, expressed
Chr6	5045400	5045450	-	CDS	0.0171947	LOC_Os06g09900	expressed protein
Chr6	5045850	5045900	-	5'-UTR	0.0364885	LOC_Os06g09900	expressed protein
Chr6	6819300	6819350	-	CDS	0.0379345	LOC_Os06g12580	pro-resilin precursor, putative, expressed
Chr6	6932300	6932350	-	5'-UTR	0.0379345	LOC_Os06g12690	DCN1-like protein 2, putative, expressed
Chr6	7987400	7987450	-	5'-UTR	0.0440533	LOC_Os06g14324	caleosin related protein, putative, expressed
Chr6	7987650	7987700	-	5'-UTR	0.0171947	LOC_Os06g14324	caleosin related protein, putative, expressed
Chr6	8752350	8752400	-	CDS	0.0440533	LOC_Os06g15400	expressed protein
Chr6	16056550	16056600	-	Intron	0.0171947	LOC_Os06g28250	expressed protein
Chr6	16479050	16479100	-	5'-UTR	0.0379345	LOC_Os06g28880	retrotransposon protein, putative, unclassified, expressed
Chr6	23583150	23583200	-	CDS	0.0379345	LOC_Os06g39738	apocytochrome f precursor, putative, expressed
Chr6	23879450	23879500	-	CDS	0.0379345	LOC_Os06g40120	SPX domain containing protein, putative, expressed
Chr6	24403850	24403900	-	CDS	0.00762113	LOC_Os06g40940	glycine dehydrogenase, putative, expressed
Chr6	24403950	24404000	-	CDS	0.011911	LOC_Os06g40940	glycine dehydrogenase, putative, expressed
Chr6	24405750	24405850	-	CDS	0.0135868	LOC_Os06g40940	glycine dehydrogenase, putative, expressed
Chr6	25202550	25202600	-	CDS	0.023352	LOC_Os06g41990	M16 domain containing zinc peptidase, putative, expressed
Chr6	25210150	25210200	-	CDS	0.0379345	LOC_Os06g41990	M16 domain containing zinc peptidase, putative, expressed
Chr6	26877950	26878000	-	CDS	2.88169e-06	LOC_Os06g44500	OsFBK17 - F-box domain and kelch repeat containing protein, expressed
Chr6	26878750	26878800	-	CDS	0.023352	LOC_Os06g44500	OsFBK17 - F-box domain and kelch repeat containing protein, expressed
Chr6	27402900	27402950	-	CDS	0.0379345	LOC_Os06g45340	peptidyl-prolyl cis-trans isomerase, FKBP-type, putative, expressed
Chr6	27496050	27496150	-	3'-UTR	0.023352	LOC_Os06g45480	hydrolase, putative, expressed
Chr6	28639700	28639750	-	3'-UTR	0.00254522	LOC_Os06g47230	coiled-coil domain-containing protein 72, putative, expressed
Chr6	28641300	28641350	-	5'-UTR	0.0168844	LOC_Os06g47230	coiled-coil domain-containing protein 72, putative, expressed
Chr6	29761650	29761700	-	5'-UTR	0.023352	LOC_Os06g49110	delta-aminolevulinic acid dehydratase, chloroplast precursor, putative, expressed
Chr6	30877500	30877550	-	CDS	0.0171947	LOC_Os06g51029	OsFtsH1 FtsH protease, homologue of AtFtsH1/5, expressed
Chr7	446650	446700	-	CDS	0.0440533	LOC_Os07g01760	aminotransferase, classes I and II, domain containing protein, expressed
Chr7	450750	450800	-	CDS	0.0231063	LOC_Os07g01760	aminotransferase, classes I and II, domain containing protein, expressed
Chr7	450950	451000	-	CDS	0.0263865	LOC_Os07g01760	aminotransferase, classes I and II, domain containing protein, expressed
Chr7	760300	760350	-	CDS	0.023352	LOC_Os07g02300	tetratricopeptide repeat domain containing protein, expressed
Chr7	2137150	2137200	-	CDS	0.0180432	LOC_Os07g04840	PsbP, putative, expressed
Chr7	2138000	2138200	-	CDS	0.0127853	LOC_Os07g04840	PsbP, putative, expressed
Chr7	3654500	3654550	-	CDS	0.023352	LOC_Os07g07310	polynucleotide phosphorylase, putative, expressed
Chr7	4776350	4776400	-	CDS	0.023352	LOC_Os07g09150	expressed protein
Chr7	5892300	5892350	-	CDS	0.006052	LOC_Os07g10840	uncharacterized glycosyltransferase, putative, expressed
Chr7	7583200	7583300	-	CDS	0.0236599	LOC_Os07g13234	expressed protein
Chr7	10115850	10115900	-	3'-UTR	0.023352	LOC_Os07g17184	expressed protein
Chr7	14231750	14231900	-	CDS	0.00278353	LOC_Os07g24992	uncharacterized protein ycf68, putative
Chr7	14232000	14232200	-	CDS	0.0151476	LOC_Os07g24992	uncharacterized protein ycf68, putative
Chr7	14243600	14243700	-	CDS	0.0135868	LOC_Os07g25018	uncharacterized protein ycf72, putative
Chr7	17307400	17307450	-	CDS	0.023352	LOC_Os07g29480	transposon protein, putative, CACTA, En/Spm sub-class, expressed
Chr7	18335100	18335150	-	3'-UTR	0.0440533	LOC_Os07g30970	nucleoside diphosphate kinase, putative, expressed
Chr7	19656500	19656550	-	CDS	0.0379345	LOC_Os07g32880	ATP synthase gamma chain, putative, expressed
Chr7	19656700	19656750	-	CDS	0.0121644	LOC_Os07g32880	ATP synthase gamma chain, putative, expressed
Chr7	19657100	19657150	-	CDS	0.0149316	LOC_Os07g32880	ATP synthase gamma chain, putative, expressed
Chr7	19657350	19657400	-	CDS	0.00782765	LOC_Os07g32880	ATP synthase gamma chain, putative, expressed
Chr7	19907100	19907150	-	3'-UTR	0.0459865	LOC_Os07g33300	expressed protein
Chr7	21521700	21521750	-	CDS	0.0277857	LOC_Os07g35979	expressed protein
Chr7	21575100	21575150	-	3'-UTR	0.0130372	LOC_Os07g36090	ribosomal protein L28 protein, putative, expressed
Chr7	22316650	22316750	-	CDS	0.0308954	LOC_Os07g37240	chlorophyll A-B binding protein, putative, expressed
Chr7	22316850	22316900	-	CDS	0.0100928	LOC_Os07g37240	chlorophyll A-B binding protein, putative, expressed
Chr7	22317700	22317850	-	CDS	0.0209486	LOC_Os07g37240	chlorophyll A-B binding protein, putative, expressed
Chr7	22490250	22490300	-	CDS	0.023352	LOC_Os07g37560	myosin-Vb, putative, expressed
Chr7	22890000	22890050	-	CDS	0.0458108	LOC_Os07g38170	remorin, putative, expressed
Chr7	23050550	23050600	-	CDS	0.023352	LOC_Os07g38360	expressed protein
Chr7	23052300	23052350	-	CDS	0.000808064	LOC_Os07g38360	expressed protein
Chr7	23055200	23055250	-	CDS	0.0379345	LOC_Os07g38360	expressed protein
Chr7	23597250	23597300	-	CDS	0.023352	LOC_Os07g39390	retrotransposon protein, putative, unclassified, expressed
Chr7	24356050	24356100	-	Intron	0.023352	LOC_Os07g40640	expressed protein
Chr7	24762850	24762900	-	CDS	0.023352	LOC_Os07g41330	mitochondrial import inner membrane translocase subunit Tim17, putative, expressed
Chr7	26888400	26888450	-	CDS	0.0379345	LOC_Os07g45064	Phosphatidylinositol kinase and FAT containing domain protein, putative, expressed
Chr7	27725850	27725900	-	CDS	0.023352	LOC_Os07g46460	ferredoxin-dependent glutamate synthase, chloroplast precursor, putative, expressed
Chr7	27738000	27738050	-	CDS	0.00782765	LOC_Os07g46460	ferredoxin-dependent glutamate synthase, chloroplast precursor, putative, expressed
Chr7	27890900	27891000	-	CDS	0.0155898	LOC_Os07g46670	early response to dehydration 15, putative, expressed
Chr7	27901200	27901350	-	5'-UTR	0.00126723	LOC_Os07g46680	expressed protein
Chr7	28471550	28471600	-	CDS	0.023352	LOC_Os07g47630	RNA recognition motif containing protein, expressed
Chr7	28474750	28474800	-	3'-UTR	0.0083506	LOC_Os07g47640	ultraviolet-B-repressible protein, putative, expressed
Chr7	28851900	28851950	-	5'-UTR	0.023352	LOC_Os07g48280	expressed protein
Chr7	29117600	29117650	-	CDS	0.0231063	LOC_Os07g48630	ethylene-insensitive 3, putative, expressed
Chr7	29547750	29547800	-	CDS	0.0260264	LOC_Os07g49330	phospholipase C, putative, expressed
Chr8	242100	242200	-	3'-UTR	1.05487e-08	LOC_Os08g01380	2Fe-2S iron-sulfur cluster binding domain containing protein, expressed
Chr8	1090100	1090150	-	CDS	0.00303774	LOC_Os08g02630	photosystem II core complex proteins psbY, chloroplast precursor, putative, expressed
Chr8	2179900	2179950	-	CDS	0.023352	LOC_Os08g04450	DAG protein, chloroplast precursor, putative, expressed
Chr8	3338150	3338200	-	CDS	0.0379345	LOC_Os08g06100	O-methyltransferase, putative, expressed
Chr8	3340450	3340500	-	CDS	0.0440533	LOC_Os08g06100	O-methyltransferase, putative, expressed
Chr8	3518000	3518050	-	CDS	0.0427623	LOC_Os08g06344	transposon protein, putative, CACTA, En/Spm sub-class, expressed
Chr8	3518550	3518600	-	CDS	0.0440533	LOC_Os08g06344	transposon protein, putative, CACTA, En/Spm sub-class, expressed
Chr8	5806750	5806800	-	3'-UTR	0.0499645	LOC_Os08g10020	photosystem II 10 kDa polypeptide, chloroplast precursor, putative, expressed
Chr8	5807450	5807500	-	CDS	0.034781	LOC_Os08g10020	photosystem II 10 kDa polypeptide, chloroplast precursor, putative, expressed
Chr8	5808100	5808150	-	CDS	0.0229253	LOC_Os08g10020	photosystem II 10 kDa polypeptide, chloroplast precursor, putative, expressed
Chr8	8680800	8680850	-	3'-UTR	0.0379345	LOC_Os08g14460	expressed protein
Chr8	9249750	9249800	-	CDS	0.0379345	LOC_Os08g15236	uncharacterized protein ycf68, putative, expressed
Chr8	9249850	9250000	-	CDS	0.0029723	LOC_Os08g15236	uncharacterized protein ycf68, putative, expressed
Chr8	9250100	9250250	-	CDS	0.00629671	LOC_Os08g15236	uncharacterized protein ycf68, putative, expressed
Chr8	9269700	9269750	-	5'-UTR	0.0379345	LOC_Os08g15292	cytochrome b6-f complex subunit 4, putative, expressed
Chr8	9271700	9271750	-	3'-UTR	0.0018521	LOC_Os08g15296	photosystem II reaction center protein H, putative, expressed
Chr8	15336550	15336600	-	Intron	0.023352	LOC_Os08g25250	retrotransposon protein, putative, unclassified, expressed
Chr8	15336850	15336900	-	Intron	0.0379345	LOC_Os08g25250	retrotransposon protein, putative, unclassified, expressed
Chr8	19887250	19887300	-	CDS	0.0440533	LOC_Os08g32080	CPuORF27 - conserved peptide uORF-containing transcript, expressed
Chr8	19887350	19887400	-	CDS	0.0379345	LOC_Os08g32080	CPuORF27 - conserved peptide uORF-containing transcript, expressed
Chr8	20657750	20657800	-	CDS	0.0440533	LOC_Os08g33190	linker histone H1 and H5 family protein, expressed
Chr8	20657850	20657900	-	CDS	0.0379345	LOC_Os08g33190	linker histone H1 and H5 family protein, expressed
Chr8	21171650	21171700	-	3'-UTR	0.0184649	LOC_Os08g33820	chlorophyll A-B binding protein, putative, expressed
Chr8	21171750	21171800	-	CDS	0.00666994	LOC_Os08g33820	chlorophyll A-B binding protein, putative, expressed
Chr8	21171850	21171900	-	CDS	0.00627595	LOC_Os08g33820	chlorophyll A-B binding protein, putative, expressed
Chr8	21172150	21172200	-	CDS	0.0380601	LOC_Os08g33820	chlorophyll A-B binding protein, putative, expressed
Chr8	21172400	21172450	-	CDS	0.036618	LOC_Os08g33820	chlorophyll A-B binding protein, putative, expressed
Chr8	21172500	21172550	-	CDS	0.0239378	LOC_Os08g33820	chlorophyll A-B binding protein, putative, expressed
Chr8	22618950	22619000	-	CDS	0.00782765	LOC_Os08g35860	cytokinin dehydrogenase precursor, putative, expressed
Chr8	23613550	23613600	-	CDS	0.0440533	LOC_Os08g37370	mitochondrial carrier protein, putative, expressed
Chr8	24587400	24587450	-	5'-UTR	0.0379345	LOC_Os08g38900	caffeoyl-CoA O-methyltransferase, putative, expressed
Chr8	24698550	24698600	-	CDS	0.023352	LOC_Os08g39090	coiled-coil domain containing 49, putative, expressed
Chr8	24828400	24828450	-	3'-UTR	0.023352	LOC_Os08g39300	aminotransferase, putative, expressed
Chr8	24828950	24829000	-	3'-UTR	0.025125	LOC_Os08g39300	aminotransferase, putative, expressed
Chr8	24829400	24829450	-	CDS	0.0120405	LOC_Os08g39300	aminotransferase, putative, expressed
Chr8	25222650	25222700	-	CDS	0.0440533	LOC_Os08g39840	lipoxygenase, chloroplast precursor, putative, expressed
Chr8	25872550	25872600	-	CDS	0.023352	LOC_Os08g40900	auxin response factor, putative, expressed
Chr8	27216450	27216500	-	CDS	0.023352	LOC_Os08g43060	expressed protein
Chr8	27548750	27548800	-	CDS	0.00297331	LOC_Os08g43550	MYB family transcription factor, putative, expressed
Chr8	28083550	28083600	-	3'-UTR	0.00930715	LOC_Os08g44680	photosystem I reaction center subunit II, chloroplast precursor, putative, expressed
Chr8	28083700	28083750	-	CDS	0.00354983	LOC_Os08g44680	photosystem I reaction center subunit II, chloroplast precursor, putative, expressed
Chr8	28083900	28083950	-	CDS	0.0344646	LOC_Os08g44680	photosystem I reaction center subunit II, chloroplast precursor, putative, expressed
Chr8	28084000	28084050	-	CDS	0.00700769	LOC_Os08g44680	photosystem I reaction center subunit II, chloroplast precursor, putative, expressed
Chr8	28172000	28172050	-	CDS	0.011911	LOC_Os08g44850	C2 domain containing protein, putative, expressed
Chr8	28172100	28172150	-	CDS	0.0231063	LOC_Os08g44850	C2 domain containing protein, putative, expressed
Chr8	28297750	28297800	-	CDS	0.023352	LOC_Os08g45080	expressed protein
Chr9	4393000	4393050	-	Intron	0.00615063	LOC_Os09g08430	ribosomal protein L22, putative, expressed
Chr9	5479800	5479850	-	Intron	0.00762113	LOC_Os09g10054	disease resistance protein RPS2, putative, expressed
Chr9	5482450	5482500	-	CDS	0.023352	LOC_Os09g10054	disease resistance protein RPS2, putative, expressed
Chr9	9087950	9088000	-	5'-UTR	0.0231063	LOC_Os09g15044	expressed protein
Chr9	9088100	9088150	-	5'-UTR	0.0440533	LOC_Os09g15044	expressed protein
Chr9	9321700	9321750	-	5'-UTR	0.0379345	LOC_Os09g15284	expressed protein
Chr9	10606050	10606100	-	Intron	0.00635819	LOC_Os09g17329	expressed protein
Chr9	10610850	10610950	-	Intron	0.0249228	LOC_Os09g17329	expressed protein
Chr9	10618700	10618750	-	CDS	0.00782765	LOC_Os09g17329	expressed protein
Chr9	10619400	10619450	-	5'-UTR	0.00303774	LOC_Os09g17329	expressed protein
Chr9	10621550	10621650	-	CDS	0.0227377	LOC_Os09g17329	expressed protein
Chr9	11551750	11551800	-	CDS	0.023352	LOC_Os09g19300	retrotransposon protein, putative, unclassified, expressed
Chr9	13577400	13577450	-	CDS	0.0288789	LOC_Os09g22505	expressed protein
Chr9	14506650	14506700	-	CDS	0.00401029	LOC_Os09g24406	uncharacterized protein ycf72, putative
Chr9	14696300	14696350	-	CDS	0.00782765	LOC_Os09g24700	expressed protein
Chr9	14696450	14696500	-	CDS	0.0379345	LOC_Os09g24700	expressed protein
Chr9	14697200	14697250	-	CDS	0.0171947	LOC_Os09g24700	expressed protein
Chr9	18469800	18469850	-	3'-UTR	0.0397263	LOC_Os09g30350	expressed protein
Chr9	18470100	18470150	-	3'-UTR	0.00893849	LOC_Os09g30350	expressed protein
Chr9	18517200	18517250	-	CDS	0.0379345	LOC_Os09g30412	heat shock protein, putative, expressed
Chr9	18537550	18537600	-	CDS	0.0379345	LOC_Os09g30418	heat shock protein, putative, expressed
Chr9	18538600	18538650	-	CDS	0.00782765	LOC_Os09g30418	heat shock protein, putative, expressed
Chr9	19196100	19196150	-	5'-UTR	0.0379345	LOC_Os09g32169	expressed protein
Chr9	20950700	20950750	-	CDS	0.00782765	LOC_Os09g36300	OsLonP4 - Putative Lon protease homologue, expressed
Chr9	21349050	21349100	-	CDS	0.023352	LOC_Os09g37012	eukaryotic aspartyl protease domain containing protein, expressed
Chr9	22702850	22702900	-	5'-UTR	0.023352	LOC_Os09g39540	40S ribosomal protein S25, putative, expressed
